# Supplementary material for: Living on the edge: environmental variability of a shallow late Holocene cold-water coral mound
Source: Coral Reefs. 2022 Apr 12;41(4):1255–71. doi: 10.1007/s00338-022-02249-4 (PMC9325858; doi:10.1007/s00338-022-02249-4)
Supplement: Supplementary file 3 — Supplementary file3 (XLSX 367 kb) [file 338_2022_2249_MOESM3_ESM.xlsx]

## Sheet: Sheet1
Computed Tomography results on sediment core POS 576-1 for details please see text.
Section	Depth	Slice	Exterior	Matrix	Coral	Sum (Coral + Matrix)	Coral Volume %
2	0	1281	9061.6	8808.83	202.869	9011.7	2.25118
2	0.09	1280	9061.6	8769.39	242.308	9011.7	2.68881
2	0.18	1279	9061.6	8773.87	237.826	9011.7	2.63908
2	0.27	1278	9061.6	8787.62	224.082	9011.7	2.48657
2	0.36	1277	9061.6	8798.97	212.729	9011.7	2.36059
2	0.45	1276	9061.6	8803.45	208.247	9011.7	2.31085
2	0.54	1275	9061.6	8822.28	189.424	9011.7	2.10198
2	0.63	1274	9061.6	8842.59	169.108	9011.7	1.87653
2	0.72	1273	9061.6	8886.51	125.187	9011.7	1.38917
2	0.81	1272	9061.6	8903.54	108.157	9011.7	1.20019
2	0.9	1271	9061.6	8885.62	126.084	9011.7	1.39911
2	0.99	1270	9061.6	8845.88	165.821	9011.7	1.84006
2	1.08	1269	9061.6	8857.83	153.87	9011.7	1.70745
2	1.17	1268	9061.6	8862.31	149.388	9011.7	1.65772
2	1.26	1267	9061.6	8882.93	128.773	9011.7	1.42895
2	1.35	1266	9061.6	8875.16	136.541	9011.7	1.51515
2	1.44	1265	9061.6	8869.18	142.516	9011.7	1.58146
2	1.53	1264	9061.6	8869.78	141.919	9011.7	1.57483
2	1.62	1263	9061.6	8883.82	127.876	9011.7	1.419
2	1.71	1262	9061.6	8891.29	120.407	9011.7	1.33612
2	1.8	1261	9061.6	8899.06	112.639	9011.7	1.24992
2	1.89	1260	9061.6	8876.65	135.047	9011.7	1.49857
2	1.98	1259	9061.6	8860.82	150.882	9011.7	1.67429
2	2.07	1258	9061.6	8853.95	157.754	9011.7	1.75055
2	2.16	1257	9061.6	8825.86	185.839	9011.7	2.0622
2	2.25	1256	9061.6	8795.09	216.613	9011.7	2.40369
2	2.34	1255	9061.6	8820.78	190.918	9011.7	2.11856
2	2.43	1254	9061.6	8831.54	180.162	9011.7	1.9992
2	2.52	1253	9061.6	8830.94	180.76	9011.7	2.00584
2	2.61	1252	9061.6	8828.55	183.15	9011.7	2.03236
2	2.7	1251	9061.6	8860.82	150.882	9011.7	1.67429
2	2.79	1250	9061.6	8878.74	132.956	9011.7	1.47537
2	2.88	1249	9061.6	8887.71	123.992	9011.7	1.3759
2	2.97	1248	9061.6	8893.98	117.718	9011.7	1.30628
2	3.06	1247	9061.6	8888.6	123.096	9011.7	1.36596
2	3.15	1246	9061.6	8857.23	154.468	9011.7	1.71408
2	3.24	1245	9061.6	8866.2	145.504	9011.7	1.61461
2	3.33	1244	9061.6	8862.61	149.09	9011.7	1.6544
2	3.42	1243	9061.6	8828.85	182.851	9011.7	2.02904
2	3.51	1242	9061.6	8825.56	186.138	9011.7	2.06551
2	3.6	1241	9061.6	8843.49	168.211	9011.7	1.86659
2	3.69	1240	9061.6	8864.1	147.596	9011.7	1.63782
2	3.78	1239	9061.6	8826.46	185.242	9011.7	2.05557
2	3.87	1238	9061.6	8815.11	196.595	9011.7	2.18155
2	3.96	1237	9061.6	8792.4	219.302	9011.7	2.43353
2	4.05	1236	9061.6	8807.04	204.662	9011.7	2.27107
2	4.14	1235	9061.6	8839.6	172.095	9011.7	1.90969
2	4.23	1234	9061.6	8874.26	137.437	9011.7	1.5251
2	4.32	1233	9061.6	8863.81	147.894	9011.7	1.64114
2	4.41	1232	9061.6	8844.09	167.614	9011.7	1.85996
2	4.5	1231	9061.6	8873.67	138.035	9011.7	1.53173
2	4.59	1230	9061.6	8889.8	121.901	9011.7	1.3527
2	4.68	1229	9061.6	8917.29	94.4134	9011.7	1.04768
2	4.77	1228	9061.6	8897.27	114.431	9011.7	1.26981
2	4.86	1227	9061.6	8911.61	100.09	9011.7	1.11067
2	4.95	1226	9061.6	8923.86	87.8403	9011.7	0.974736
2	5.04	1225	9061.6	8896.67	115.029	9011.7	1.27644
2	5.13	1224	9061.6	8888.6	123.096	9011.7	1.36596
2	5.22	1223	9061.6	8878.74	132.956	9011.7	1.47537
2	5.31	1222	9061.6	8831.54	180.162	9011.7	1.9992
2	5.4	1221	9061.6	8786.42	225.278	9011.7	2.49983
2	5.49	1220	9061.6	8730.25	281.448	9011.7	3.12313
2	5.58	1219	9061.6	8672.29	339.41	9011.7	3.76633
2	5.67	1218	9061.6	8654.06	357.636	9011.7	3.96857
2	5.76	1217	9061.6	8651.38	360.325	9011.7	3.99841
2	5.85	1216	9061.6	8601.48	410.22	9011.7	4.55209
2	5.94	1215	9061.6	8546.21	465.494	9011.7	5.16544
2	6.03	1214	9061.6	8559.95	451.75	9011.7	5.01293
2	6.12	1213	9061.6	8626.58	385.123	9011.7	4.27359
2	6.21	1212	9061.6	8670.2	341.502	9011.7	3.78954
2	6.3	1211	9061.6	8654.36	357.337	9011.7	3.96525
2	6.39	1210	9061.6	8628.07	383.629	9011.7	4.25701
2	6.48	1209	9061.6	8667.21	344.489	9011.7	3.82269
2	6.57	1208	9061.6	8707.84	303.856	9011.7	3.37179
2	6.66	1207	9061.6	8753.26	258.442	9011.7	2.86785
2	6.75	1206	9061.6	8757.74	253.96	9011.7	2.81812
2	6.84	1205	9061.6	8744.29	267.405	9011.7	2.96731
2	6.93	1204	9061.6	8742.8	268.899	9011.7	2.98389
2	7.02	1203	9061.6	8742.8	268.899	9011.7	2.98389
2	7.11	1202	9061.6	8784.33	227.369	9011.7	2.52304
2	7.2	1201	9061.6	8773.58	238.125	9011.7	2.6424
2	7.29	1200	9061.6	8798.67	213.028	9011.7	2.3639
2	7.38	1199	9061.6	8831.84	179.864	9011.7	1.99589
2	7.47	1198	9061.6	8865.9	145.803	9011.7	1.61793
2	7.56	1197	9061.6	8902.65	109.053	9011.7	1.21013
2	7.65	1196	9061.6	8926.55	85.1513	9011.7	0.944898
2	7.74	1195	9061.6	8945.97	65.7309	9011.7	0.729395
2	7.83	1194	9061.6	8923.26	88.4379	9011.7	0.981367
2	7.92	1193	9061.6	8871.87	139.827	9011.7	1.55162
2	8.01	1192	9061.6	8884.12	127.578	9011.7	1.41569
2	8.1	1191	9061.6	8923.26	88.4379	9011.7	0.981367
2	8.19	1190	9061.6	8931.63	80.0721	9011.7	0.888535
2	8.28	1189	9061.6	8926.25	85.4501	9011.7	0.948213
2	8.37	1188	9061.6	8937.01	74.6942	9011.7	0.828858
2	8.46	1187	9061.6	8968.08	43.6214	9011.7	0.484053
2	8.55	1186	9061.6	8969.57	42.1275	9011.7	0.467476
2	8.64	1185	9061.6	8939.99	71.7064	9011.7	0.795703
2	8.73	1184	9061.6	8924.46	87.2428	9011.7	0.968106
2	8.82	1183	9061.6	8902.95	108.755	9011.7	1.20682
2	8.91	1182	9061.6	8876.35	135.346	9011.7	1.50189
2	9	1181	9061.6	8854.25	157.455	9011.7	1.74723
2	9.09	1180	9061.6	8840.5	171.199	9011.7	1.89974
2	9.18	1179	9061.6	8856.34	155.364	9011.7	1.72402
2	9.27	1178	9061.6	8886.51	125.187	9011.7	1.38917
2	9.36	1177	9061.6	8856.34	155.364	9011.7	1.72402
2	9.45	1176	9061.6	8799.27	212.43	9011.7	2.35727
2	9.54	1175	9061.6	8711.43	300.271	9011.7	3.33201
2	9.63	1174	9061.6	8715.31	296.386	9011.7	3.28891
2	9.72	1173	9061.6	8743.1	268.6	9011.7	2.98057
2	9.81	1172	9061.6	8680.95	330.746	9011.7	3.67018
2	9.9	1171	9061.6	8622.1	389.605	9011.7	4.32332
2	9.99	1170	9061.6	8601.78	409.922	9011.7	4.54877
2	10.08	1169	9061.6	8533.36	478.341	9011.7	5.308
2	10.17	1168	9061.6	8558.75	452.945	9011.7	5.02619
2	10.26	1167	9061.6	8575.19	436.513	9011.7	4.84384
2	10.35	1166	9061.6	8611.34	400.361	9011.7	4.44268
2	10.44	1165	9061.6	8629.86	381.837	9011.7	4.23712
2	10.53	1164	9061.6	8614.33	397.373	9011.7	4.40952
2	10.62	1163	9061.6	8574.89	436.811	9011.7	4.84716
2	10.71	1162	9061.6	8553.68	458.025	9011.7	5.08255
2	10.8	1161	9061.6	8559.05	452.647	9011.7	5.02288
2	10.89	1160	9061.6	8587.44	424.263	9011.7	4.70791
2	10.98	1159	9061.6	8546.8	464.896	9011.7	5.15881
2	11.07	1158	9061.6	8529.77	481.927	9011.7	5.34779
2	11.16	1157	9061.6	8582.66	429.043	9011.7	4.76096
2	11.25	1156	9061.6	8651.97	359.727	9011.7	3.99178
2	11.34	1155	9061.6	8659.74	351.959	9011.7	3.90558
2	11.43	1154	9061.6	8603.87	407.83	9011.7	4.52556
2	11.52	1153	9061.6	8458.07	553.633	9011.7	6.14349
2	11.61	1152	9061.6	8357.08	654.62	9011.7	7.26411
2	11.7	1151	9061.6	8280.29	731.405	9011.7	8.11617
2	11.79	1150	9061.6	8279.4	732.301	9011.7	8.12612
2	11.88	1149	9061.6	8159.89	851.812	9011.7	9.45229
2	11.97	1148	9061.6	8099.83	911.866	9011.7	10.1187
2	12.06	1147	9061.6	8055.62	956.085	9011.7	10.6094
2	12.15	1146	9061.6	8068.16	943.537	9011.7	10.4701
2	12.24	1145	9061.6	8084.3	927.403	9011.7	10.2911
2	12.33	1144	9061.6	8045.76	965.945	9011.7	10.7188
2	12.42	1143	9061.6	7960.31	1051.39	9011.7	11.667
2	12.51	1142	9061.6	7899.65	1112.05	9011.7	12.34
2	12.6	1141	9061.6	7798.07	1213.63	9011.7	13.4673
2	12.69	1140	9061.6	7783.13	1228.57	9011.7	13.633
2	12.78	1139	9061.6	7804.64	1207.06	9011.7	13.3943
2	12.87	1138	9061.6	7798.07	1213.63	9011.7	13.4673
2	12.96	1137	9061.6	7744.89	1266.81	9011.7	14.0574
2	13.05	1136	9061.6	7713.22	1298.48	9011.7	14.4089
2	13.14	1135	9061.6	7622.39	1389.31	9011.7	15.4167
2	13.23	1134	9061.6	7614.62	1397.08	9011.7	15.503
2	13.32	1133	9061.6	7662.13	1349.57	9011.7	14.9758
2	13.41	1132	9061.6	7705.75	1305.95	9011.7	14.4917
2	13.5	1131	9061.6	7816.59	1195.11	9011.7	13.2617
2	13.59	1130	9061.6	7844.98	1166.72	9011.7	12.9468
2	13.68	1129	9061.6	7941.18	1070.52	9011.7	11.8792
2	13.77	1128	9061.6	8033.8	977.896	9011.7	10.8514
2	13.86	1127	9061.6	8049.34	962.359	9011.7	10.679
2	13.95	1126	9061.6	8070.55	941.146	9011.7	10.4436
2	14.04	1125	9061.6	8142.26	869.44	9011.7	9.6479
2	14.13	1124	9061.6	8008.11	1003.59	9011.7	11.1365
2	14.22	1123	9061.6	7905.93	1105.77	9011.7	12.2704
2	14.31	1122	9061.6	7877.25	1134.45	9011.7	12.5887
2	14.4	1121	9061.6	7877.84	1133.86	9011.7	12.5821
2	14.49	1120	9061.6	7888.9	1122.8	9011.7	12.4594
2	14.58	1119	9061.6	7842.59	1169.11	9011.7	12.9733
2	14.67	1118	9061.6	7763.71	1247.99	9011.7	13.8486
2	14.76	1117	9061.6	7684.83	1326.87	9011.7	14.7238
2	14.85	1116	9061.6	7685.13	1326.57	9011.7	14.7205
2	14.94	1115	9061.6	7701.86	1309.84	9011.7	14.5348
2	15.03	1114	9061.6	7753.85	1257.85	9011.7	13.958
2	15.12	1113	9061.6	7758.03	1253.67	9011.7	13.9115
2	15.21	1112	9061.6	7692.6	1319.1	9011.7	14.6376
2	15.3	1111	9061.6	7586.83	1424.87	9011.7	15.8113
2	15.39	1110	9061.6	7550.38	1461.32	9011.7	16.2158
2	15.48	1109	9061.6	7592.81	1418.89	9011.7	15.745
2	15.57	1108	9061.6	7690.51	1321.19	9011.7	14.6608
2	15.66	1107	9061.6	7715.31	1296.39	9011.7	14.3857
2	15.75	1106	9061.6	7740.7	1271	9011.7	14.1038
2	15.84	1105	9061.6	7776.26	1235.44	9011.7	13.7093
2	15.93	1104	9061.6	7795.98	1215.72	9011.7	13.4905
2	16.02	1103	9061.6	7684.53	1327.17	9011.7	14.7271
2	16.11	1102	9061.6	7671.99	1339.71	9011.7	14.8664
2	16.2	1101	9061.6	7679.75	1331.95	9011.7	14.7802
2	16.29	1100	9061.6	7702.16	1309.54	9011.7	14.5315
2	16.38	1099	9061.6	7743.09	1268.61	9011.7	14.0773
2	16.47	1098	9061.6	7758.03	1253.67	9011.7	13.9115
2	16.56	1097	9061.6	7716.8	1294.9	9011.7	14.3691
2	16.65	1096	9061.6	7606.25	1405.45	9011.7	15.5958
2	16.74	1095	9061.6	7638.82	1372.88	9011.7	15.2344
2	16.83	1094	9061.6	7683.34	1328.36	9011.7	14.7404
2	16.92	1093	9061.6	7750.27	1261.43	9011.7	13.9977
2	17.01	1092	9061.6	7677.66	1334.04	9011.7	14.8034
2	17.1	1091	9061.6	7490.63	1521.07	9011.7	16.8789
2	17.19	1090	9061.6	7548.59	1463.11	9011.7	16.2357
2	17.28	1089	9061.6	7841.99	1169.71	9011.7	12.9799
2	17.37	1088	9061.6	7994.37	1017.33	9011.7	11.289
2	17.46	1087	9061.6	7957.62	1054.08	9011.7	11.6968
2	17.55	1086	9061.6	7935.21	1076.49	9011.7	11.9455
2	17.64	1085	9061.6	7903.84	1107.86	9011.7	12.2936
2	17.73	1084	9061.6	7907.42	1104.28	9011.7	12.2538
2	17.82	1083	9061.6	7973.45	1038.25	9011.7	11.5211
2	17.91	1082	9061.6	8053.22	958.475	9011.7	10.6359
2	18	1081	9061.6	8202.61	809.087	9011.7	8.97818
2	18.09	1080	9061.6	8319.73	691.967	9011.7	7.67854
2	18.18	1079	9061.6	8428.49	583.212	9011.7	6.47172
2	18.27	1078	9061.6	8509.16	502.542	9011.7	5.57655
2	18.36	1077	9061.6	8539.63	472.067	9011.7	5.23838
2	18.45	1076	9061.6	8563.83	447.866	9011.7	4.96983
2	18.54	1075	9061.6	8600.88	410.818	9011.7	4.55872
2	18.63	1074	9061.6	8592.22	419.482	9011.7	4.65486
2	18.72	1073	9061.6	8539.04	472.665	9011.7	5.24501
2	18.81	1072	9061.6	8471.51	540.188	9011.7	5.9943
2	18.9	1071	9061.6	8432.97	578.73	9011.7	6.42199
2	18.99	1070	9061.6	8504.38	507.323	9011.7	5.6296
2	19.08	1069	9061.6	8524.4	487.305	9011.7	5.40747
2	19.17	1068	9061.6	8470.62	541.084	9011.7	6.00424
2	19.26	1067	9061.6	8414.45	597.254	9011.7	6.62755
2	19.35	1066	9061.6	8470.32	541.383	9011.7	6.00756
2	19.44	1065	9061.6	8450.6	561.102	9011.7	6.22638
2	19.53	1064	9061.6	8393.53	618.169	9011.7	6.85962
2	19.62	1063	9061.6	8356.18	655.516	9011.7	7.27405
2	19.71	1062	9061.6	8305.09	706.607	9011.7	7.84099
2	19.8	1061	9061.6	8199.92	811.776	9011.7	9.00802
2	19.89	1060	9061.6	8121.35	890.354	9011.7	9.87998
2	19.98	1059	9061.6	8150.03	861.672	9011.7	9.5617
2	20.07	1058	9061.6	8215.16	796.538	9011.7	8.83894
2	20.16	1057	9061.6	8231.59	780.106	9011.7	8.65659
2	20.25	1056	9061.6	8200.82	810.88	9011.7	8.99808
2	20.34	1055	9061.6	8020.66	991.042	9011.7	10.9973
2	20.43	1054	9061.6	7888	1123.7	9011.7	12.4693
2	20.52	1053	9061.6	7829.44	1182.26	9011.7	13.1192
2	20.61	1052	9061.6	7788.51	1223.19	9011.7	13.5734
2	20.7	1051	9061.6	7677.66	1334.04	9011.7	14.8034
2	20.79	1050	9061.6	7571.6	1440.1	9011.7	15.9804
2	20.88	1049	9061.6	7342.44	1669.26	9011.7	18.5233
2	20.97	1048	9061.6	7261.47	1750.23	9011.7	19.4218
2	21.06	1047	9061.6	7312.26	1699.44	9011.7	18.8582
2	21.15	1046	9061.6	7516.92	1494.78	9011.7	16.5871
2	21.24	1045	9061.6	7711.72	1299.98	9011.7	14.4254
2	21.33	1044	9061.6	7831.23	1180.47	9011.7	13.0993
2	21.42	1043	9061.6	7939.99	1071.71	9011.7	11.8924
2	21.51	1042	9061.6	8004.82	1006.88	9011.7	11.173
2	21.6	1041	9061.6	7927.44	1084.26	9011.7	12.0317
2	21.69	1040	9061.6	7731.14	1280.56	9011.7	14.2099
2	21.78	1039	9061.6	7649.88	1361.82	9011.7	15.1117
2	21.87	1038	9061.6	7564.43	1447.27	9011.7	16.0599
2	21.96	1037	9061.6	7583.85	1427.85	9011.7	15.8444
2	22.05	1036	9061.6	7487.04	1524.66	9011.7	16.9186
2	22.14	1035	9061.6	7502.28	1509.42	9011.7	16.7496
2	22.23	1034	9061.6	7415.04	1596.66	9011.7	17.7177
2	22.32	1033	9061.6	7248.92	1762.78	9011.7	19.561
2	22.41	1032	9061.6	7260.27	1751.43	9011.7	19.4351
2	22.5	1031	9061.6	7324.81	1686.89	9011.7	18.7189
2	22.59	1030	9061.6	7346.02	1665.68	9011.7	18.4835
2	22.68	1029	9061.6	7272.22	1739.48	9011.7	19.3024
2	22.77	1028	9061.6	7441.03	1570.67	9011.7	17.4292
2	22.86	1027	9061.6	7680.65	1331.05	9011.7	14.7702
2	22.95	1026	9061.6	7853.34	1158.36	9011.7	12.8539
2	23.04	1025	9061.6	7946.56	1065.14	9011.7	11.8195
2	23.13	1024	9061.6	8078.62	933.079	9011.7	10.3541
2	23.22	1023	9061.6	8103.12	908.58	9011.7	10.0822
2	23.31	1022	9061.6	8091.77	919.933	9011.7	10.2082
2	23.4	1021	9061.6	8028.73	982.975	9011.7	10.9078
2	23.49	1020	9061.6	8017.97	993.731	9011.7	11.0271
2	23.58	1019	9061.6	8003.93	1007.77	9011.7	11.1829
2	23.67	1018	9061.6	7934.91	1076.79	9011.7	11.9488
2	23.76	1017	9061.6	7850.06	1161.64	9011.7	12.8904
2	23.85	1016	9061.6	7875.15	1136.55	9011.7	12.6119
2	23.94	1015	9061.6	7925.65	1086.05	9011.7	12.0516
2	24.03	1014	9061.6	7886.21	1125.49	9011.7	12.4892
2	24.12	1013	9061.6	7881.73	1129.97	9011.7	12.539
2	24.21	1012	9061.6	7890.69	1121.01	9011.7	12.4395
2	24.3	1011	9061.6	7882.03	1129.67	9011.7	12.5356
2	24.39	1010	9061.6	7798.97	1212.73	9011.7	13.4573
2	24.48	1009	9061.6	7784.33	1227.37	9011.7	13.6198
2	24.57	1008	9061.6	7829.44	1182.26	9011.7	13.1192
2	24.66	1007	9061.6	7755.64	1256.06	9011.7	13.9381
2	24.75	1006	9061.6	7767	1244.7	9011.7	13.8121
2	24.84	1005	9061.6	7764.61	1247.09	9011.7	13.8386
2	24.93	1004	9061.6	7756.84	1254.86	9011.7	13.9248
2	25.02	1003	9061.6	7901.45	1110.25	9011.7	12.3201
2	25.11	1002	9061.6	8006.32	1005.38	9011.7	11.1564
2	25.2	1001	9061.6	8001.24	1010.46	9011.7	11.2128
2	25.29	1000	9061.6	8002.73	1008.97	9011.7	11.1962
2	25.38	999	9061.6	8075.04	936.665	9011.7	10.3939
2	25.47	998	9061.6	8112.98	898.72	9011.7	9.97281
2	25.56	997	9061.6	8072.94	938.756	9011.7	10.4171
2	25.65	996	9061.6	7954.93	1056.77	9011.7	11.7267
2	25.74	995	9061.6	7895.47	1116.23	9011.7	12.3864
2	25.83	994	9061.6	7856.03	1155.67	9011.7	12.8241
2	25.92	993	9061.6	7775.06	1236.64	9011.7	13.7226
2	26.01	992	9061.6	7666.91	1344.79	9011.7	14.9228
2	26.1	991	9061.6	7643.3	1368.4	9011.7	15.1847
2	26.19	990	9061.6	7667.21	1344.49	9011.7	14.9194
2	26.28	989	9061.6	7793.59	1218.11	9011.7	13.517
2	26.37	988	9061.6	7897.86	1113.84	9011.7	12.3599
2	26.46	987	9061.6	7929.83	1081.87	9011.7	12.0052
2	26.55	986	9061.6	7931.32	1080.38	9011.7	11.9886
2	26.64	985	9061.6	7927.74	1083.96	9011.7	12.0284
2	26.73	984	9061.6	8032.31	979.39	9011.7	10.868
2	26.82	983	9061.6	8055.02	956.683	9011.7	10.616
2	26.91	982	9061.6	8052.33	959.372	9011.7	10.6458
2	27	981	9061.6	8066.07	945.628	9011.7	10.4933
2	27.09	980	9061.6	8045.16	966.542	9011.7	10.7254
2	27.18	979	9061.6	7991.98	1019.72	9011.7	11.3156
2	27.27	978	9061.6	7912.8	1098.9	9011.7	12.1942
2	27.36	977	9061.6	7834.52	1177.18	9011.7	13.0628
2	27.45	976	9061.6	7859.32	1152.38	9011.7	12.7876
2	27.54	975	9061.6	7954.03	1057.67	9011.7	11.7366
2	27.63	974	9061.6	7948.65	1063.05	9011.7	11.7963
2	27.72	973	9061.6	7960.01	1051.69	9011.7	11.6703
2	27.81	972	9061.6	8005.72	1005.98	9011.7	11.1631
2	27.9	971	9061.6	8055.62	956.085	9011.7	10.6094
2	27.99	970	9061.6	8102.52	909.177	9011.7	10.0889
2	28.08	969	9061.6	8121.94	889.757	9011.7	9.87335
2	28.17	968	9061.6	8104.91	906.787	9011.7	10.0623
2	28.26	967	9061.6	8094.46	917.244	9011.7	10.1784
2	28.35	966	9061.6	8205.6	806.099	9011.7	8.94503
2	28.44	965	9061.6	8285.67	726.027	9011.7	8.05649
2	28.53	964	9061.6	8261.77	749.929	9011.7	8.32173
2	28.62	963	9059.5	8280	733.795	9013.79	8.14081
2	28.71	962	9059.5	8296.13	717.661	9013.79	7.96182
2	28.8	961	9059.5	8397.12	616.675	9013.79	6.84146
2	28.89	960	9059.5	8452.39	561.401	9013.79	6.22825
2	28.98	959	9059.5	8483.46	530.328	9013.79	5.88352
2	29.07	958	9059.5	8483.16	530.627	9013.79	5.88684
2	29.16	957	9059.5	8505.57	508.219	9013.79	5.63824
2	29.25	956	9059.5	8474.8	538.993	9013.79	5.97965
2	29.34	955	9059.5	8466.13	547.658	9013.79	6.07577
2	29.43	954	9059.5	8468.52	545.267	9013.79	6.04926
2	29.52	953	9059.5	8475.4	538.395	9013.79	5.97302
2	29.61	952	9059.5	8540.53	473.262	9013.79	5.25042
2	29.7	951	9059.5	8599.09	414.702	9013.79	4.60075
2	29.79	950	9059.5	8653.47	360.325	9013.79	3.99748
2	29.88	949	9059.5	8706.95	306.844	9013.79	3.40416
2	29.97	948	9059.5	8751.76	262.027	9013.79	2.90696
2	30.06	947	9059.5	8793.29	220.497	9013.79	2.44622
2	30.15	946	9059.5	8795.98	217.808	9013.79	2.41639
2	30.24	945	9059.5	8753.86	259.936	9013.79	2.88375
2	30.33	944	9059.5	8760.73	253.064	9013.79	2.80752
2	30.42	943	9059.5	8817.5	196.296	9013.79	2.17773
2	30.51	942	9059.5	8817.79	195.997	9013.79	2.17442
2	30.6	941	9059.5	8840.2	173.589	9013.79	1.92582
2	30.69	940	9059.5	8836.62	177.175	9013.79	1.96559
2	30.78	939	9059.5	8816.3	197.491	9013.79	2.19099
2	30.87	938	9059.5	8789.71	224.082	9013.79	2.486
2	30.96	937	9059.5	8790.31	223.485	9013.79	2.47937
2	31.05	936	9059.5	8793.59	220.198	9013.79	2.44291
2	31.14	935	9059.5	8796.28	217.509	9013.79	2.41307
2	31.23	934	9059.5	8809.73	204.064	9013.79	2.26391
2	31.32	933	9059.5	8837.51	176.278	9013.79	1.95565
2	31.41	932	9059.5	8853.95	159.845	9013.79	1.77334
2	31.5	931	9059.5	8885.62	128.175	9013.79	1.42199
2	31.59	930	9059.5	8900.26	113.535	9013.79	1.25957
2	31.68	929	9059.5	8911.01	102.779	9013.79	1.14024
2	31.77	928	9059.5	8931.63	82.1636	9013.79	0.911532
2	31.86	927	9059.5	8927.45	86.3464	9013.79	0.957937
2	31.95	926	9059.5	8919.68	94.1146	9013.79	1.04412
2	32.04	925	9059.5	8899.96	113.834	9013.79	1.26289
2	32.13	924	9059.5	8885.02	128.773	9013.79	1.42862
2	32.22	923	9059.5	8897.57	116.224	9013.79	1.2894
2	32.31	922	9059.5	8912.51	101.285	9013.79	1.12367
2	32.4	921	9059.5	8896.97	116.822	9013.79	1.29603
2	32.49	920	9059.5	8902.05	111.742	9013.79	1.23968
2	32.58	919	9059.5	8908.92	104.871	9013.79	1.16345
2	32.67	918	9059.5	8942.38	71.4076	9013.79	0.792204
2	32.76	917	9059.5	8958.82	54.9749	9013.79	0.609898
2	32.85	916	9059.5	8965.09	48.7006	9013.79	0.54029
2	32.94	915	9059.5	8969.57	44.2189	9013.79	0.49057
2	33.03	914	9059.5	8970.77	43.0238	9013.79	0.477311
2	33.12	913	9059.5	8974.05	39.7373	9013.79	0.44085
2	33.21	912	9059.5	8976.44	37.3471	9013.79	0.414333
2	33.3	911	9059.5	8957.92	55.8712	9013.79	0.619842
2	33.39	910	9059.5	8939.99	73.7978	9013.79	0.818721
2	33.48	909	9059.5	8930.43	83.3587	9013.79	0.92479
2	33.57	908	9059.5	8936.11	77.6819	9013.79	0.861812
2	33.66	907	9059.5	8914	99.7914	9013.79	1.1071
2	33.75	906	9059.5	8870.68	143.114	9013.79	1.58772
2	33.84	905	9059.5	8867.69	146.102	9013.79	1.62087
2	33.93	904	9059.5	8883.53	130.267	9013.79	1.44519
2	34.02	903	9059.5	8914.3	99.4926	9013.79	1.10378
2	34.11	902	9059.5	8948.96	64.8345	9013.79	0.719281
2	34.2	901	9059.5	8975.25	38.5422	9013.79	0.427591
2	34.29	900	9059.5	8974.65	39.1397	9013.79	0.434221
2	34.38	899	9059.5	8978.24	35.5544	9013.79	0.394445
2	34.47	898	9059.5	8990.19	23.6034	9013.79	0.261858
2	34.56	897	9059.5	8976.44	37.3471	9013.79	0.414333
2	34.65	896	9059.5	8938.5	75.2917	9013.79	0.835295
2	34.74	895	9059.5	8922.07	91.7244	9013.79	1.0176
2	34.83	894	9059.5	8935.51	78.2795	9013.79	0.868441
2	34.92	893	9059.5	8941.19	72.6027	9013.79	0.805463
2	35.01	892	9059.5	8931.63	82.1636	9013.79	0.911532
2	35.1	891	9059.5	8951.95	61.8468	9013.79	0.686135
2	35.19	890	9059.5	8967.48	46.3104	9013.79	0.513772
2	35.28	889	9059.5	8976.44	37.3471	9013.79	0.414333
2	35.37	888	9059.5	8977.34	36.4507	9013.79	0.404389
2	35.46	887	9059.5	8974.95	38.841	9013.79	0.430906
2	35.55	886	9059.5	8982.12	31.6703	9013.79	0.351354
2	35.64	885	9059.5	8987.8	25.9936	9013.79	0.288375
2	35.73	884	9059.5	8989.89	23.9021	9013.79	0.265173
2	35.82	883	9059.5	8991.98	21.8107	9013.79	0.24197
2	35.91	882	9059.5	8997.36	16.4327	9013.79	0.182306
2	36	881	9059.5	9002.74	11.0547	9013.79	0.122642
2	36.09	880	9059.5	9001.84	11.9511	9013.79	0.132586
2	36.18	879	9059.5	8984.81	28.9813	9013.79	0.321522
2	36.27	878	9059.5	8990.79	23.0058	9013.79	0.255229
2	36.36	877	9059.5	8994.07	19.7193	9013.79	0.218768
2	36.45	876	9059.5	8997.36	16.4327	9013.79	0.182306
2	36.54	875	9059.5	9003.04	10.756	9013.79	0.119328
2	36.63	874	9059.5	9003.33	10.4572	9013.79	0.116013
2	36.72	873	9059.5	9001.84	11.9511	9013.79	0.132586
2	36.81	872	9059.5	9002.14	11.6523	9013.79	0.129272
2	36.9	871	9059.5	9006.92	6.87186	9013.79	0.0762372
2	36.99	870	9059.5	9008.71	5.0792	9013.79	0.0563492
2	37.08	869	9059.5	9006.92	6.87186	9013.79	0.0762372
2	37.17	868	9059.5	8994.37	19.4205	9013.79	0.215453
2	37.26	867	9059.5	8986.9	26.8899	9013.79	0.298319
2	37.35	866	9059.5	8984.21	29.5789	9013.79	0.328151
2	37.44	865	9059.5	8985.11	28.6826	9013.79	0.318207
2	37.53	864	9059.5	8979.13	34.6581	9013.79	0.384501
2	37.62	863	9059.5	8951.35	62.4443	9013.79	0.692764
2	37.71	862	9059.5	8966.29	47.5055	9013.79	0.527031
2	37.8	861	9059.5	8984.81	28.9813	9013.79	0.321522
2	37.89	860	9059.5	8987.8	25.9936	9013.79	0.288375
2	37.98	859	9059.5	8979.73	34.0605	9013.79	0.377871
2	38.07	858	9059.5	8974.95	38.841	9013.79	0.430906
2	38.16	857	9059.5	8968.38	45.414	9013.79	0.503828
2	38.25	856	9062.49	8969.27	41.5299	9010.8	0.460891
2	38.34	855	9062.49	8979.73	31.0728	9010.8	0.344839
2	38.43	854	9062.49	8975.55	35.2556	9010.8	0.39126
2	38.52	853	9062.49	8963.9	46.9079	9010.8	0.520574
2	38.61	852	9062.49	8955.23	55.5724	9010.8	0.616731
2	38.7	851	9062.49	8943.28	67.5235	9010.8	0.749362
2	38.79	850	9062.49	8956.73	54.0786	9010.8	0.600153
2	38.88	849	9062.49	8972.26	38.5422	9010.8	0.427733
2	38.97	848	9062.49	8977.64	33.1642	9010.8	0.368049
2	39.06	847	9062.49	8979.13	31.6703	9010.8	0.351471
2	39.15	846	9062.49	8971.37	39.4385	9010.8	0.43768
2	39.24	845	9062.49	8965.39	45.414	9010.8	0.503995
2	39.33	844	9062.49	8961.8	48.9994	9010.8	0.543785
2	39.42	843	9062.49	8966.88	43.9202	9010.8	0.487417
2	39.51	842	9062.49	8970.47	40.3348	9010.8	0.447628
2	39.6	841	9062.49	8975.25	35.5544	9010.8	0.394575
2	39.69	840	9062.49	8971.07	39.7373	9010.8	0.440996
2	39.78	839	9062.49	8972.26	38.5422	9010.8	0.427733
2	39.87	838	9062.49	8991.68	19.1217	9010.8	0.212209
2	39.96	837	9062.49	9003.63	7.17064	9010.8	0.0795782
2	40.05	836	9062.49	9009.61	1.19511	9010.8	0.013263
2	40.14	835	9062.49	8996.76	14.0425	9010.8	0.155841
2	40.23	834	9062.49	8987.8	23.0058	9010.8	0.255313
2	40.32	833	9062.49	8962.1	48.7006	9010.8	0.540469
2	40.41	832	9062.49	8915.2	95.6085	9010.8	1.06104
2	40.5	831	9062.49	8899.96	110.846	9010.8	1.23015
2	40.59	830	9062.49	8914	96.8036	9010.8	1.07431
2	40.68	829	9062.49	8942.98	67.8223	9010.8	0.752677
2	40.77	828	9062.49	8962.4	48.4018	9010.8	0.537153
2	40.86	827	9062.49	8979.73	31.0728	9010.8	0.344839
2	40.95	826	9062.49	8977.34	33.463	9010.8	0.371365
2	41.04	825	9062.49	8995.57	15.2376	9010.8	0.169104
2	41.13	824	9062.49	9010.8	0	9010.8	0
2	41.22	823	9062.49	9010.8	0	9010.8	0
2	41.31	822	9062.49	9009.01	1.79266	9010.8	0.0198946
2	41.4	821	9062.49	8997.66	13.1462	9010.8	0.145893
2	41.49	820	9062.49	8993.47	17.329	9010.8	0.192314
2	41.58	819	9062.49	9001.54	9.26208	9010.8	0.102789
2	41.67	818	9062.49	9005.43	5.37798	9010.8	0.0596837
2	41.76	817	9062.49	9007.52	3.28654	9010.8	0.0364734
2	41.85	816	9062.49	9008.12	2.68899	9010.8	0.0298418
2	41.94	815	9062.49	8968.68	42.1275	9010.8	0.467522
2	42.03	814	9062.49	8967.78	43.0238	9010.8	0.477469
2	42.12	813	9062.49	8982.12	28.6826	9010.8	0.318313
2	42.21	812	9062.49	8997.36	13.4449	9010.8	0.149209
2	42.3	811	9062.49	9000.05	10.756	9010.8	0.119367
2	42.39	810	9062.49	9006.62	4.18287	9010.8	0.0464206
2	42.48	809	9062.49	9006.62	4.18287	9010.8	0.0464206
2	42.57	808	9062.49	9007.82	2.98777	9010.8	0.0331576
2	42.66	807	9062.49	9003.63	7.17064	9010.8	0.0795782
2	42.75	806	9062.49	9001.24	9.56085	9010.8	0.106104
2	42.84	805	9062.49	9000.65	10.1584	9010.8	0.112736
2	42.93	804	9062.49	8999.45	11.3535	9010.8	0.125999
2	43.02	803	9062.49	9002.44	8.36575	9010.8	0.0928413
2	43.11	802	9062.49	9006.62	4.18287	9010.8	0.0464206
2	43.2	801	9062.49	9008.41	2.39021	9010.8	0.0265261
2	43.29	800	9062.49	9010.5	0.298777	9010.8	0.00331576
2	43.38	799	9062.49	9008.12	2.68899	9010.8	0.0298418
2	43.47	798	9062.49	9006.02	4.78043	9010.8	0.0530522
2	43.56	797	9062.49	9004.83	5.97553	9010.8	0.0663152
2	43.65	796	9062.49	9010.21	0.597553	9010.8	0.00663152
2	43.74	795	9062.49	9007.82	2.98777	9010.8	0.0331576
2	43.83	794	9062.49	9009.01	1.79266	9010.8	0.0198946
2	43.92	793	9062.49	9009.01	1.79266	9010.8	0.0198946
2	44.01	792	9062.49	9008.71	2.09144	9010.8	0.0232103
2	44.1	791	9062.49	9006.62	4.18287	9010.8	0.0464206
2	44.19	790	9062.49	9006.02	4.78043	9010.8	0.0530522
2	44.28	789	9062.49	9007.52	3.28654	9010.8	0.0364734
2	44.37	788	9062.49	9008.41	2.39021	9010.8	0.0265261
2	44.46	787	9062.49	9009.61	1.19511	9010.8	0.013263
2	44.55	786	9062.49	8996.46	14.3413	9010.8	0.159156
2	44.64	785	9062.49	8985.11	25.6948	9010.8	0.285155
2	44.73	784	9062.49	8999.75	11.0547	9010.8	0.122683
2	44.82	783	9062.49	9008.71	2.09144	9010.8	0.0232103
2	44.91	782	9062.49	9008.41	2.39021	9010.8	0.0265261
2	45	781	9062.49	9000.05	10.756	9010.8	0.119367
2	45.09	780	9062.49	8993.77	17.0303	9010.8	0.188998
2	45.18	779	9062.49	8979.43	31.3715	9010.8	0.348155
2	45.27	778	9062.49	8967.48	43.3226	9010.8	0.480785
2	45.36	777	9062.49	8968.08	42.7251	9010.8	0.474154
2	45.45	776	9062.49	8975.55	35.2556	9010.8	0.39126
2	45.54	775	9062.49	8991.38	19.4205	9010.8	0.215524
2	45.63	774	9062.49	8986.01	24.7985	9010.8	0.275208
2	45.72	773	9062.49	8970.17	40.6336	9010.8	0.450943
2	45.81	772	9062.49	8967.18	43.6214	9010.8	0.484101
2	45.9	771	9062.49	8981.82	28.9813	9010.8	0.321629
2	45.99	770	9062.49	8990.49	20.3168	9010.8	0.225472
2	46.08	769	9062.49	8971.66	39.1397	9010.8	0.434365
2	46.17	768	9062.49	8965.69	45.1153	9010.8	0.50068
2	46.26	767	9062.49	8969.27	41.5299	9010.8	0.460891
2	46.35	766	9062.49	8968.08	42.7251	9010.8	0.474154
2	46.44	765	9062.49	8974.65	36.152	9010.8	0.401207
2	46.53	764	9062.49	8975.25	35.5544	9010.8	0.394575
2	46.62	763	9062.49	8964.49	46.3104	9010.8	0.513943
2	46.71	762	9062.49	8974.35	36.4507	9010.8	0.404523
2	46.8	761	9062.49	8977.94	32.8654	9010.8	0.364734
2	46.89	760	9062.49	8984.51	26.2923	9010.8	0.291787
2	46.98	759	9062.49	8991.08	19.7193	9010.8	0.21884
2	47.07	758	9062.49	9002.74	8.06697	9010.8	0.0895255
2	47.16	757	9062.49	9001.24	9.56085	9010.8	0.106104
2	47.25	756	9062.49	8991.08	19.7193	9010.8	0.21884
2	47.34	755	9062.49	8988.1	22.707	9010.8	0.251998
2	47.43	754	9062.49	8991.08	19.7193	9010.8	0.21884
2	47.52	753	9062.49	8990.79	20.018	9010.8	0.222156
2	47.61	752	9062.49	8986.3	24.4997	9010.8	0.271892
2	47.7	751	9062.49	8969.27	41.5299	9010.8	0.460891
2	47.79	750	9062.49	8955.23	55.5724	9010.8	0.616731
2	47.88	749	9062.49	8924.16	86.6452	9010.8	0.96157
2	47.97	748	9062.49	8907.43	103.377	9010.8	1.14725
2	48.06	747	9062.49	8901.75	109.053	9010.8	1.21025
2	48.15	746	9062.49	8867.69	143.114	9010.8	1.58825
2	48.24	745	9062.49	8808.83	201.973	9010.8	2.24145
2	48.33	744	9062.49	8795.68	215.119	9010.8	2.38735
2	48.42	743	9062.49	8813.31	197.491	9010.8	2.19172
2	48.51	742	9062.49	8821.98	188.827	9010.8	2.09556
2	48.6	741	9062.49	8796.88	213.924	9010.8	2.37408
2	48.69	740	9062.49	8796.28	214.522	9010.8	2.38072
2	48.78	739	9062.49	8752.36	258.442	9010.8	2.86813
2	48.87	738	9062.49	8622.1	388.708	9010.8	4.3138
2	48.96	737	9062.49	8592.82	417.988	9010.8	4.63875
2	49.05	736	9062.49	8598.19	412.611	9010.8	4.57906
2	49.14	735	9062.49	8607.75	403.05	9010.8	4.47296
2	49.23	734	9062.49	8606.56	404.245	9010.8	4.48622
2	49.32	733	9062.49	8663.03	347.776	9010.8	3.85954
2	49.41	732	9062.49	8723.08	287.722	9010.8	3.19308
2	49.5	731	9062.49	8737.72	273.082	9010.8	3.0306
2	49.59	730	9062.49	8732.04	278.759	9010.8	3.0936
2	49.68	729	9062.49	8736.83	273.978	9010.8	3.04055
2	49.77	728	9062.49	8758.34	252.466	9010.8	2.80182
2	49.86	727	9062.49	8811.82	198.985	9010.8	2.2083
2	49.95	726	9062.49	8787.92	222.887	9010.8	2.47356
2	50.04	725	9062.49	8770.59	240.216	9010.8	2.66587
2	50.13	724	9062.49	8811.82	198.985	9010.8	2.2083
2	50.22	723	9062.49	8805.54	205.26	9010.8	2.27793
2	50.31	722	9062.49	8811.52	199.284	9010.8	2.21161
2	50.4	721	9062.49	8837.51	173.29	9010.8	1.92314
2	50.49	720	9062.49	8886.51	124.291	9010.8	1.37936
2	50.58	719	9062.49	8940.89	69.9137	9010.8	0.775888
2	50.67	718	9062.49	8947.16	63.6394	9010.8	0.706257
2	50.76	717	9062.49	8926.55	84.255	9010.8	0.935044
2	50.85	716	9062.49	8936.11	74.6942	9010.8	0.82894
2	50.94	715	9062.49	8953.74	57.0663	9010.8	0.63331
2	51.03	714	9062.49	8949.85	60.9504	9010.8	0.676415
2	51.12	713	9062.49	8942.68	68.1211	9010.8	0.755993
2	51.21	712	9062.49	8957.62	53.1822	9010.8	0.590205
2	51.3	711	9062.49	8931.33	79.4746	9010.8	0.881992
2	51.39	710	9062.49	8897.87	112.938	9010.8	1.25336
2	51.48	709	9062.49	8926.55	84.255	9010.8	0.935044
2	51.57	708	9062.49	8933.42	77.3831	9010.8	0.858782
2	51.66	707	9062.49	8938.8	72.0052	9010.8	0.799098
2	51.75	706	9062.49	8946.57	64.237	9010.8	0.712888
2	51.84	705	9062.49	8948.36	62.4443	9010.8	0.692994
2	51.93	704	9062.49	8892.49	118.316	9010.8	1.31304
2	52.02	703	9062.49	8818.09	192.711	9010.8	2.13867
2	52.11	702	9062.49	8769.39	241.411	9010.8	2.67913
2	52.2	701	9062.49	8758.64	252.167	9010.8	2.7985
2	52.29	700	9062.49	8795.68	215.119	9010.8	2.38735
2	52.38	699	9062.49	8878.45	132.358	9010.8	1.46888
2	52.47	698	9062.49	8909.82	100.987	9010.8	1.12073
2	52.56	697	9062.49	8915.49	95.3097	9010.8	1.05773
2	52.65	696	9062.49	8917.88	92.9195	9010.8	1.0312
2	52.74	695	9062.49	8901.75	109.053	9010.8	1.21025
2	52.83	694	9062.49	8879.64	131.163	9010.8	1.45562
2	52.92	693	9062.49	8885.92	124.889	9010.8	1.38599
2	53.01	692	9062.49	8911.91	98.8951	9010.8	1.09752
2	53.1	691	9062.49	8950.75	60.0541	9010.8	0.666468
2	53.19	690	9062.49	8945.37	65.4321	9010.8	0.726151
2	53.28	689	9062.49	8916.39	94.4134	9010.8	1.04778
2	53.37	688	9062.49	8891.89	118.913	9010.8	1.31967
2	53.46	687	9062.49	8859.32	151.48	9010.8	1.68109
2	53.55	686	9062.49	8868.59	142.218	9010.8	1.5783
2	53.64	685	9062.49	8862.91	147.894	9010.8	1.6413
2	53.73	684	9062.49	8816	194.802	9010.8	2.16188
2	53.82	683	9062.49	8782.24	228.564	9010.8	2.53656
2	53.91	682	9062.49	8749.67	261.131	9010.8	2.89797
2	54	681	9062.49	8755.65	255.155	9010.8	2.83166
2	54.09	680	9062.49	8781.94	228.863	9010.8	2.53987
2	54.18	679	9062.49	8814.81	195.997	9010.8	2.17514
2	54.27	678	9062.49	8822.87	187.93	9010.8	2.08561
2	54.36	677	9062.49	8812.12	198.686	9010.8	2.20498
2	54.45	676	9062.49	8785.23	225.576	9010.8	2.5034
2	54.54	675	9062.49	8789.41	221.393	9010.8	2.45698
2	54.63	674	9062.49	8775.97	234.838	9010.8	2.60619
2	54.72	673	9062.49	8744	266.808	9010.8	2.96097
2	54.81	672	9062.49	8737.42	273.381	9010.8	3.03392
2	54.9	671	9062.49	8712.62	298.179	9010.8	3.30913
2	54.99	670	9062.49	8697.09	313.715	9010.8	3.48155
2	55.08	669	9062.49	8651.38	359.428	9010.8	3.98886
2	55.17	668	9062.49	8544.12	466.689	9010.8	5.17922
2	55.26	667	9062.49	8497.51	513.298	9010.8	5.69648
2	55.35	666	9062.49	8491.23	519.573	9010.8	5.76611
2	55.44	665	9062.49	8479.88	530.926	9010.8	5.89211
2	55.53	664	9062.49	8415.64	595.163	9010.8	6.60499
2	55.62	663	9062.49	8376.8	634.004	9010.8	7.03604
2	55.71	662	9062.49	8419.82	590.98	9010.8	6.55857
2	55.8	661	9062.49	8496.61	514.195	9010.8	5.70642
2	55.89	660	9062.49	8543.22	467.585	9010.8	5.18916
2	55.98	659	9062.49	8519.62	491.189	9010.8	5.45111
2	56.07	658	9062.49	8485.55	525.249	9010.8	5.82911
2	56.16	657	9062.49	8508.86	501.945	9010.8	5.57048
2	56.25	656	9062.49	8503.18	507.621	9010.8	5.63348
2	56.34	655	9062.49	8523.2	487.603	9010.8	5.41132
2	56.43	654	9062.49	8565.33	445.476	9010.8	4.9438
2	56.52	653	9062.49	8620.6	390.202	9010.8	4.33038
2	56.61	652	9062.49	8626.28	384.526	9010.8	4.26738
2	56.7	651	9062.49	8620.3	390.501	9010.8	4.3337
2	56.79	650	9062.49	8538.44	472.366	9010.8	5.24222
2	56.88	649	9062.49	8444.02	566.779	9010.8	6.29
2	56.97	648	9062.49	8343.93	666.869	9010.8	7.40078
2	57.06	647	9062.49	8300.61	710.192	9010.8	7.88156
2	57.15	646	9062.49	8332.58	678.223	9010.8	7.52677
2	57.24	645	9062.49	8401.9	608.907	9010.8	6.75752
2	57.33	644	9062.49	8500.19	510.609	9010.8	5.66663
2	57.42	643	9062.49	8598.49	412.312	9010.8	4.57575
2	57.51	642	9063.09	8643.61	366.599	9010.21	4.06871
2	57.6	641	9063.09	8688.72	321.484	9010.21	3.56799
2	57.69	640	9063.09	8711.13	299.075	9010.21	3.3193
2	57.78	639	9063.09	8744.89	265.314	9010.21	2.94459
2	57.87	638	9063.09	8786.72	223.485	9010.21	2.48035
2	57.96	637	9063.09	8803.45	206.753	9010.21	2.29466
2	58.05	636	9063.09	8830.94	179.266	9010.21	1.98959
2	58.14	635	9063.09	8847.37	162.833	9010.21	1.80721
2	58.23	634	9063.09	8858.13	152.077	9010.21	1.68783
2	58.32	633	9063.09	8825.56	184.644	9010.21	2.04928
2	58.41	632	9063.09	8814.51	195.699	9010.21	2.17197
2	58.5	631	9063.09	8875.46	134.748	9010.21	1.49551
2	58.59	630	9063.09	8886.81	123.395	9010.21	1.3695
2	58.68	629	9063.09	8868.59	141.62	9010.21	1.57177
2	58.77	628	9063.09	8854.54	155.663	9010.21	1.72763
2	58.86	627	9063.09	8842.89	167.315	9010.21	1.85695
2	58.95	626	9063.09	8876.06	134.151	9010.21	1.48887
2	59.04	625	9063.09	8903.24	106.962	9010.21	1.18712
2	59.13	624	9063.09	8946.27	63.9382	9010.21	0.70962
2	59.22	623	9063.09	8976.74	33.463	9010.21	0.37139
2	59.31	622	9063.09	8980.93	29.2801	9010.21	0.324966
2	59.4	621	9063.09	8984.21	25.9936	9010.21	0.28849
2	59.49	620	9063.09	9001.24	8.9633	9010.21	0.0994794
2	59.58	619	9063.09	8991.08	19.1217	9010.21	0.212223
2	59.67	618	9063.09	8957.02	53.1822	9010.21	0.590244
2	59.76	617	9063.09	8920.57	89.633	9010.21	0.994794
2	59.85	616	9063.09	8900.85	109.352	9010.21	1.21365
2	59.94	615	9063.09	8918.48	91.7244	9010.21	1.01801
2	60.03	614	9063.09	8923.86	86.3464	9010.21	0.958318
2	60.12	613	9063.09	8903.84	106.364	9010.21	1.18049
2	60.21	612	9063.09	8890.1	120.108	9010.21	1.33302
2	60.3	611	9063.09	8877.55	132.657	9010.21	1.47229
2	60.39	610	9063.09	8863.21	146.998	9010.21	1.63146
2	60.48	609	9063.09	8856.04	154.169	9010.21	1.71105
2	60.57	608	9063.09	8851.26	158.949	9010.21	1.7641
2	60.66	607	9063.09	8853.05	157.156	9010.21	1.74421
2	60.75	606	9063.09	8851.56	158.65	9010.21	1.76079
2	60.84	605	9063.09	8839.31	170.9	9010.21	1.89674
2	60.93	604	9063.09	8827.95	182.254	9010.21	2.02275
2	61.02	603	9063.09	8828.55	181.656	9010.21	2.01612
2	61.11	602	9063.09	8845.58	164.626	9010.21	1.8271
2	61.2	601	9063.09	8868.29	141.919	9010.21	1.57509
2	61.29	600	9063.09	8902.35	107.858	9010.21	1.19707
2	61.38	599	9063.09	8915.49	94.7122	9010.21	1.05117
2	61.47	598	9063.09	8931.63	78.5782	9010.21	0.872103
2	61.56	597	9063.09	8943.88	66.3284	9010.21	0.736147
2	61.65	596	9063.09	8961.51	48.7006	9010.21	0.540505
2	61.74	595	9063.09	8971.37	38.841	9010.21	0.431077
2	61.83	594	9063.09	8987.8	22.4082	9010.21	0.248698
2	61.92	593	9063.09	8993.18	17.0303	9010.21	0.189011
2	62.01	592	9063.09	8994.37	15.8352	9010.21	0.175747
2	62.1	591	9063.09	8985.11	25.0972	9010.21	0.278542
2	62.19	590	9063.09	8989.89	20.3168	9010.21	0.225487
2	62.28	589	9063.09	8995.87	14.3413	9010.21	0.159167
2	62.37	588	9063.09	8987.2	23.0058	9010.21	0.25533
2	62.46	587	9063.09	8977.34	32.8654	9010.21	0.364758
2	62.55	586	9063.09	8938.5	71.7064	9010.21	0.795835
2	62.64	585	9063.09	8942.98	67.2247	9010.21	0.746095
2	62.73	584	9063.09	8978.83	31.3715	9010.21	0.348178
2	62.82	583	9063.09	9003.33	6.87186	9010.21	0.0762675
2	62.91	582	9063.09	8996.16	14.0425	9010.21	0.155851
2	63	581	9063.09	8980.93	29.2801	9010.21	0.324966
2	63.09	580	9063.09	8950.75	59.4565	9010.21	0.65988
2	63.18	579	9063.09	8912.51	97.7	9010.21	1.08433
2	63.27	578	9063.09	8876.06	134.151	9010.21	1.48887
2	63.36	577	9063.09	8854.54	155.663	9010.21	1.72763
2	63.45	576	9063.09	8807.04	203.168	9010.21	2.25487
2	63.54	575	9063.09	8762.22	247.985	9010.21	2.75226
2	63.63	574	9063.09	8719.8	290.411	9010.21	3.22313
2	63.72	573	9063.09	8717.7	292.502	9010.21	3.24634
2	63.81	572	9063.09	8726.37	283.838	9010.21	3.15018
2	63.9	571	9063.09	8734.44	275.771	9010.21	3.06065
2	63.99	570	9063.09	8755.35	254.856	9010.21	2.82853
2	64.08	569	9063.09	8807.04	203.168	9010.21	2.25487
2	64.17	568	9063.09	8832.14	178.071	9010.21	1.97632
2	64.26	567	9063.09	8831.54	178.668	9010.21	1.98296
2	64.35	566	9063.09	8830.64	179.565	9010.21	1.9929
2	64.44	565	9063.09	8836.92	173.29	9010.21	1.92327
2	64.53	564	9063.09	8819.29	190.918	9010.21	2.11891
2	64.62	563	9063.09	8839.31	170.9	9010.21	1.89674
2	64.71	562	9063.09	8855.44	154.766	9010.21	1.71768
2	64.8	561	9063.09	8870.08	140.126	9010.21	1.55519
2	64.89	560	9063.09	8887.41	122.797	9010.21	1.36287
2	64.98	559	9063.09	8892.19	118.017	9010.21	1.30981
2	65.07	558	9063.09	8890.7	119.511	9010.21	1.32639
2	65.16	557	9063.09	8926.85	83.3587	9010.21	0.925158
2	65.25	556	9063.09	8958.52	51.6884	9010.21	0.573665
2	65.34	555	9063.09	8970.47	39.7373	9010.21	0.441025
2	65.43	554	9063.09	8971.07	39.1397	9010.21	0.434393
2	65.52	553	9063.09	8971.37	38.841	9010.21	0.431077
2	65.61	552	9063.09	8974.65	35.5544	9010.21	0.394602
2	65.7	551	9063.09	8974.05	36.152	9010.21	0.401234
2	65.79	550	9063.09	8956.13	54.0786	9010.21	0.600192
2	65.88	549	9063.09	8944.77	65.4321	9010.21	0.7262
2	65.97	548	9063.09	8942.38	67.8223	9010.21	0.752727
2	66.06	547	9063.09	8955.23	54.9749	9010.21	0.61014
2	66.15	546	9063.09	8966.29	43.9202	9010.21	0.487449
2	66.24	545	9063.09	8978.54	31.6703	9010.21	0.351494
2	66.33	544	9063.09	8977.34	32.8654	9010.21	0.364758
2	66.42	543	9063.09	8962.1	48.103	9010.21	0.533873
2	66.51	542	9063.09	8939.4	70.8101	9010.21	0.785887
2	66.6	541	9063.09	8916.09	94.1146	9010.21	1.04453
2	66.69	540	9063.09	8902.05	108.157	9010.21	1.20038
2	66.78	539	9063.09	8884.42	125.785	9010.21	1.39603
2	66.87	538	9063.09	8827.36	182.851	9010.21	2.02938
2	66.96	537	9063.09	8801.06	209.144	9010.21	2.32119
2	67.05	536	9063.09	8801.66	208.546	9010.21	2.31455
2	67.14	535	9063.09	8812.12	198.089	9010.21	2.19849
2	67.23	534	9063.09	8799.57	210.638	9010.21	2.33777
2	67.32	533	9063.09	8779.25	230.954	9010.21	2.56325
2	67.41	532	9063.09	8774.17	236.034	9010.21	2.61962
2	67.5	531	9063.09	8795.98	214.223	9010.21	2.37756
2	67.59	530	9063.09	8830.64	179.565	9010.21	1.9929
2	67.68	529	9063.09	8892.79	117.419	9010.21	1.30318
2	67.77	528	9063.09	8895.77	114.431	9010.21	1.27002
2	67.86	527	9063.09	8899.36	110.846	9010.21	1.23023
2	67.95	526	9063.09	8906.83	103.377	9010.21	1.14733
2	68.04	525	9063.09	8904.14	106.066	9010.21	1.17717
2	68.13	524	9063.09	8932.82	77.3831	9010.21	0.858839
2	68.22	523	9063.09	8973.46	36.7495	9010.21	0.407865
2	68.31	522	9063.09	8971.37	38.841	9010.21	0.431077
2	68.4	521	9063.09	8942.08	68.1211	9010.21	0.756043
2	68.49	520	9063.09	8913.7	96.5048	9010.21	1.07106
2	68.58	519	9063.09	8887.11	123.096	9010.21	1.36618
2	68.67	518	9063.09	8846.18	164.028	9010.21	1.82047
2	68.76	517	9063.09	8793.59	216.613	9010.21	2.40409
2	68.85	516	9063.09	8750.27	259.936	9010.21	2.8849
2	68.94	515	9063.09	8732.34	277.862	9010.21	3.08386
2	69.03	514	9063.09	8734.14	276.07	9010.21	3.06397
2	69.12	513	9063.09	8721.89	288.319	9010.21	3.19992
2	69.21	512	9063.09	8746.39	263.82	9010.21	2.92801
2	69.3	511	9063.09	8797.18	213.028	9010.21	2.36429
2	69.39	510	9063.09	8815.11	195.101	9010.21	2.16533
2	69.48	509	9063.09	8837.51	172.693	9010.21	1.91664
2	69.57	508	9063.09	8849.76	160.443	9010.21	1.78068
2	69.66	507	9063.09	8842.59	167.614	9010.21	1.86026
2	69.75	506	9063.09	8851.26	158.949	9010.21	1.7641
2	69.84	505	9063.09	8867.39	142.815	9010.21	1.58504
2	69.93	504	9063.09	8867.39	142.815	9010.21	1.58504
2	70.02	503	9063.09	8830.34	179.864	9010.21	1.99622
2	70.11	502	9063.09	8774.77	235.436	9010.21	2.61299
2	70.2	501	9063.09	8744.59	265.612	9010.21	2.94791
2	70.29	500	9063.09	8699.78	310.429	9010.21	3.4453
2	70.38	499	9063.09	8679.76	330.447	9010.21	3.66747
2	70.47	498	9063.09	8672.59	337.618	9010.21	3.74706
2	70.56	497	9063.09	8585.94	424.263	9010.21	4.70869
2	70.65	496	9063.09	8493.32	516.884	9010.21	5.73665
2	70.74	495	9063.09	8464.34	545.865	9010.21	6.05829
2	70.83	494	9063.09	8467.63	542.578	9010.21	6.02182
2	70.92	493	9063.09	8461.05	549.151	9010.21	6.09477
2	71.01	492	9063.09	8398.01	612.193	9010.21	6.79444
2	71.1	491	9063.09	8359.47	650.735	9010.21	7.2222
2	71.19	490	9063.09	8386.66	623.547	9010.21	6.92045
2	71.28	489	9063.09	8416.84	593.37	9010.21	6.58554
2	71.37	488	9063.09	8429.09	581.12	9010.21	6.44958
2	71.46	487	9063.09	8407.28	602.931	9010.21	6.69165
2	71.55	486	9063.09	8413.55	596.657	9010.21	6.62201
2	71.64	485	9063.09	8464.94	545.267	9010.21	6.05166
2	71.73	484	9063.09	8534.55	475.652	9010.21	5.27904
2	71.82	483	9063.09	8610.14	400.062	9010.21	4.4401
2	71.91	482	9063.09	8611.04	399.166	9010.21	4.43015
2	72	481	9063.09	8542.62	467.585	9010.21	5.18951
2	72.09	480	9063.09	8487.35	522.859	9010.21	5.80296
2	72.18	479	9063.09	8391.74	618.468	9010.21	6.86408
2	72.27	478	9063.09	8325.71	684.497	9010.21	7.59691
2	72.36	477	9063.09	8321.23	688.979	9010.21	7.64665
2	72.45	476	9063.09	8406.38	603.828	9010.21	6.70159
2	72.54	475	9063.09	8504.08	506.128	9010.21	5.61727
2	72.63	474	9063.09	8527.68	482.524	9010.21	5.35531
2	72.72	473	9063.09	8561.74	448.464	9010.21	4.97729
2	72.81	472	9063.09	8587.44	422.769	9010.21	4.69211
2	72.9	471	9063.09	8604.47	405.739	9010.21	4.5031
2	72.99	470	9063.09	8628.37	381.837	9010.21	4.23782
2	73.08	469	9063.09	8659.74	350.465	9010.21	3.88964
2	73.17	468	9063.09	8648.99	361.221	9010.21	4.00902
2	73.26	467	9063.09	8636.74	373.471	9010.21	4.14497
2	73.35	466	9063.09	8682.75	327.459	9010.21	3.63431
2	73.44	465	9063.09	8675.28	334.929	9010.21	3.71721
2	73.53	464	9063.09	8639.72	370.483	9010.21	4.11181
2	73.62	463	9063.09	8561.15	449.061	9010.21	4.98392
2	73.71	462	9063.09	8480.77	529.432	9010.21	5.87592
2	73.8	461	9063.09	8383.97	626.236	9010.21	6.95029
2	73.89	460	9063.09	8279.1	731.106	9010.21	8.1142
2	73.98	459	9063.09	8216.06	794.148	9010.21	8.81387
2	74.07	458	9063.09	8140.17	870.037	9010.21	9.65613
2	74.16	457	9063.09	8006.91	1003.29	9010.21	11.1351
2	74.25	456	9063.09	7758.33	1251.87	9010.21	13.894
2	74.34	455	9063.09	7614.32	1395.88	9010.21	15.4923
2	74.43	454	9063.09	7650.18	1360.03	9010.21	15.0943
2	74.52	453	9063.09	7752.95	1257.25	9010.21	13.9536
2	74.61	452	9063.09	7856.33	1153.88	9010.21	12.8063
2	74.7	451	9063.09	7972.26	1037.95	9010.21	11.5197
2	74.79	450	9063.09	8042.47	967.737	9010.21	10.7405
2	74.88	449	9063.09	8119.55	890.653	9010.21	9.88494
2	74.97	448	9063.09	8245.94	764.271	9010.21	8.48228
2	75.06	447	9063.09	8340.35	669.857	9010.21	7.43443
2	75.15	446	9063.09	8311.67	698.54	9010.21	7.75276
2	75.24	445	9063.09	8312.86	697.345	9010.21	7.7395
2	75.33	444	9063.09	8435.96	574.249	9010.21	6.37331
2	75.42	443	9063.09	8446.12	564.09	9010.21	6.26057
2	75.51	442	9063.09	8438.35	571.858	9010.21	6.34679
2	75.6	441	9063.09	8434.76	575.444	9010.21	6.38658
2	75.69	440	9063.09	8327.5	682.705	9010.21	7.57701
2	75.78	439	9063.09	8247.43	762.777	9010.21	8.4657
2	75.87	438	9063.09	8251.61	758.594	9010.21	8.41927
2	75.96	437	9063.09	8248.62	761.582	9010.21	8.45243
2	76.05	436	9063.09	8283.88	726.326	9010.21	8.06115
2	76.14	435	9063.09	8323.92	686.29	9010.21	7.61681
2	76.23	434	9063.09	8375.6	634.601	9010.21	7.04314
2	76.32	433	9063.09	8437.45	572.755	9010.21	6.35673
2	76.41	432	9063.09	8421.92	588.291	9010.21	6.52916
2	76.5	431	9063.09	8358.87	651.333	9010.21	7.22884
2	76.59	430	9063.09	8364.85	645.357	9010.21	7.16252
2	76.68	429	9063.09	8448.51	561.7	9010.21	6.23404
2	76.77	428	9062.19	8514.83	496.268	9011.1	5.50729
2	76.86	427	9062.19	8517.82	493.28	9011.1	5.47414
2	76.95	426	9062.19	8519.62	491.488	9011.1	5.45424
2	77.04	425	9062.19	8562.34	448.762	9011.1	4.98011
2	77.13	424	9062.19	8564.73	446.372	9011.1	4.95358
2	77.22	423	9062.19	8579.97	431.135	9011.1	4.78448
2	77.31	422	9062.19	8606.56	404.544	9011.1	4.48939
2	77.4	421	9062.19	8634.94	376.16	9011.1	4.1744
2	77.49	420	9062.19	8641.81	369.288	9011.1	4.09814
2	77.58	419	9062.19	8638.53	372.574	9011.1	4.13462
2	77.67	418	9062.19	8666.61	344.489	9011.1	3.82294
2	77.76	417	9062.19	8665.72	345.386	9011.1	3.83289
2	77.85	416	9062.19	8643.31	367.794	9011.1	4.08156
2	77.94	415	9062.19	8670.5	340.605	9011.1	3.77984
2	78.03	414	9062.19	8677.07	334.032	9011.1	3.7069
2	78.12	413	9062.19	8666.61	344.489	9011.1	3.82294
2	78.21	412	9062.19	8709.04	302.063	9011.1	3.35212
2	78.3	411	9062.19	8761.62	249.478	9011.1	2.76857
2	78.39	410	9062.19	8756.84	254.259	9011.1	2.82162
2	78.48	409	9062.19	8766.4	244.698	9011.1	2.71552
2	78.57	408	9062.19	8770.29	240.814	9011.1	2.67241
2	78.66	407	9062.19	8738.62	272.484	9011.1	3.02387
2	78.75	406	9062.19	8724.28	286.826	9011.1	3.18302
2	78.84	405	9062.19	8741.91	269.198	9011.1	2.9874
2	78.93	404	9062.19	8754.15	256.948	9011.1	2.85146
2	79.02	403	9062.19	8775.07	236.034	9011.1	2.61936
2	79.11	402	9062.19	8802.86	208.247	9011.1	2.31101
2	79.2	401	9062.19	8784.33	226.771	9011.1	2.51658
2	79.29	400	9062.19	8715.31	295.789	9011.1	3.28249
2	79.38	399	9062.19	8676.17	334.929	9011.1	3.71684
2	79.47	398	9062.19	8683.05	328.057	9011.1	3.64058
2	79.56	397	9062.19	8703.06	308.039	9011.1	3.41844
2	79.65	396	9062.19	8749.67	261.43	9011.1	2.90119
2	79.74	395	9062.19	8809.73	201.375	9011.1	2.23475
2	79.83	394	9062.19	8853.95	157.156	9011.1	1.74403
2	79.92	393	9062.19	8865.6	145.504	9011.1	1.61472
2	80.01	392	9062.19	8874.86	136.242	9011.1	1.51194
2	80.1	391	9062.19	8903.24	107.858	9011.1	1.19695
2	80.19	390	9062.19	8917.59	93.5171	9011.1	1.0378
2	80.28	389	9062.19	8919.08	92.0232	9011.1	1.02122
2	80.37	388	9062.19	8923.26	87.8403	9011.1	0.974801
2	80.46	387	9062.19	8918.78	92.322	9011.1	1.02454
2	80.55	386	9062.19	8917.88	93.2183	9011.1	1.03448
2	80.64	385	9062.19	8924.76	86.3464	9011.1	0.958223
2	80.73	384	9062.19	8935.81	75.2917	9011.1	0.835544
2	80.82	383	9062.19	8941.19	69.9137	9011.1	0.775862
2	80.91	382	9062.19	8936.71	74.3954	9011.1	0.825597
2	81	381	9062.19	8968.68	42.4263	9011.1	0.470822
2	81.09	380	9062.19	8940.29	70.8101	9011.1	0.785809
2	81.18	379	9062.19	8926.85	84.255	9011.1	0.935013
2	81.27	378	9062.19	8950.75	60.3529	9011.1	0.669761
2	81.36	377	9062.19	8967.78	43.3226	9011.1	0.480769
2	81.45	376	9062.19	8945.97	65.1333	9011.1	0.722812
2	81.54	375	9062.19	8932.52	78.5782	9011.1	0.872016
2	81.63	374	9062.19	8930.73	80.3709	9011.1	0.89191
2	81.72	373	9062.19	8941.19	69.9137	9011.1	0.775862
2	81.81	372	9062.19	8922.96	88.1391	9011.1	0.978117
2	81.9	371	9062.19	8903.84	107.261	9011.1	1.19032
2	81.99	370	9062.19	8887.11	123.992	9011.1	1.37599
2	82.08	369	9062.19	8884.12	126.98	9011.1	1.40915
2	82.17	368	9062.19	8908.92	102.182	9011.1	1.13395
2	82.26	367	9062.19	8925.35	85.7489	9011.1	0.951592
2	82.35	366	9062.19	8945.07	66.0296	9011.1	0.732759
2	82.44	365	9062.19	8945.97	65.1333	9011.1	0.722812
2	82.53	364	9062.19	8977.34	33.7618	9011.1	0.374668
2	82.62	363	9062.19	8983.62	27.4874	9011.1	0.30504
2	82.71	362	9062.19	8986.3	24.7985	9011.1	0.275199
2	82.8	361	9062.19	8985.41	25.6948	9011.1	0.285146
2	82.89	360	9062.19	8980.63	30.4752	9011.1	0.338196
2	82.98	359	9062.19	9000.65	10.4572	9011.1	0.116048
2	83.07	358	9062.19	8998.25	12.8474	9011.1	0.142573
2	83.16	357	9062.19	8982.42	28.6826	9011.1	0.318302
2	83.25	356	9062.19	8958.22	52.8835	9011.1	0.58687
2	83.34	355	9062.19	8930.73	80.3709	9011.1	0.89191
2	83.43	354	9062.19	8925.95	85.1513	9011.1	0.94496
2	83.52	353	9062.19	8938.2	72.9015	9011.1	0.809019
2	83.61	352	9062.19	8938.5	72.6027	9011.1	0.805703
2	83.7	351	9062.19	8937.9	73.2003	9011.1	0.812334
2	83.79	350	9062.19	8943.28	67.8223	9011.1	0.752653
2	83.88	349	9062.19	8931.33	79.7734	9011.1	0.885279
2	83.97	348	9062.19	8921.17	89.9318	9011.1	0.998011
2	84.06	347	9062.19	8888.31	122.797	9011.1	1.36273
2	84.15	346	9062.19	8877.25	133.852	9011.1	1.48541
2	84.24	345	9062.19	8859.62	151.48	9011.1	1.68103
2	84.33	344	9062.19	8874.56	136.541	9011.1	1.51525
2	84.42	343	9062.19	8872.17	138.931	9011.1	1.54178
2	84.51	342	9062.19	8854.84	156.26	9011.1	1.73408
2	84.6	341	9062.19	8823.77	187.333	9011.1	2.07891
2	84.69	340	9062.19	8776.56	234.54	9011.1	2.60279
2	84.78	339	9062.19	8709.34	301.764	9011.1	3.34881
2	84.87	338	9062.19	8709.04	302.063	9011.1	3.35212
2	84.96	337	9062.19	8700.08	311.026	9011.1	3.45159
2	85.05	336	9062.19	8670.5	340.605	9011.1	3.77984
2	85.14	335	9062.19	8597.89	413.208	9011.1	4.58554
2	85.23	334	9062.19	8536.05	475.055	9011.1	5.27188
2	85.32	333	9062.19	8463.15	547.956	9011.1	6.0809
2	85.41	332	9062.19	8449.1	561.999	9011.1	6.23674
2	85.5	331	9062.19	8475.1	536.005	9011.1	5.94828
2	85.59	330	9062.19	8513.64	497.463	9011.1	5.52056
2	85.68	329	9062.19	8544.41	466.689	9011.1	5.17905
2	85.77	328	9062.19	8588.93	422.171	9011.1	4.68501
2	85.86	327	9062.19	8588.93	422.171	9011.1	4.68501
2	85.95	326	9062.19	8541.72	469.378	9011.1	5.20889
2	86.04	325	9062.19	8499.6	511.506	9011.1	5.67639
2	86.13	324	9062.19	8345.73	665.375	9011.1	7.38395
2	86.22	323	9062.19	8134.19	876.909	9011.1	9.73143
2	86.31	322	9062.19	7941.78	1069.32	9011.1	11.8667
2	86.4	321	9064.29	7811.81	1197.2	9009.01	13.2889
2	86.49	320	9064.29	7833.62	1175.39	9009.01	13.0468
2	86.58	319	9064.29	7856.03	1152.98	9009.01	12.7981
2	86.67	318	9064.29	7868.28	1140.73	9009.01	12.6621
2	86.76	317	9064.29	7847.67	1161.34	9009.01	12.8909
2	86.85	316	9064.29	7955.23	1053.79	9009.01	11.697
2	86.94	315	9064.29	8034.7	974.311	9009.01	10.8148
2	87.03	314	9064.29	8081.31	927.701	9009.01	10.2975
2	87.12	313	9064.29	8190.36	818.648	9009.01	9.08699
2	87.21	312	9064.29	8228.31	780.703	9009.01	8.6658
2	87.3	311	9064.29	8281.49	727.521	9009.01	8.07548
2	87.39	310	9064.29	8298.52	710.491	9009.01	7.88645
2	87.48	309	9064.29	8327.8	681.211	9009.01	7.56144
2	87.57	308	9064.29	8364.25	644.76	9009.01	7.15683
2	87.66	307	9064.29	8373.81	635.199	9009.01	7.05071
2	87.75	306	9064.29	8333.18	675.833	9009.01	7.50174
2	87.84	305	9064.29	8292.54	716.466	9009.01	7.95277
2	87.93	304	9064.29	8342.74	666.272	9009.01	7.39562
2	88.02	303	9064.29	8332.88	676.131	9009.01	7.50506
2	88.11	302	9064.29	8319.73	689.278	9009.01	7.65098
2	88.2	301	9064.29	8370.82	638.187	9009.01	7.08387
2	88.29	300	9064.29	8394.73	614.285	9009.01	6.81856
2	88.38	299	9064.29	8377.1	631.913	9009.01	7.01423
2	88.47	298	9064.29	8363.06	645.955	9009.01	7.1701
2	88.56	297	9064.29	8393.23	615.779	9009.01	6.83514
2	88.65	296	9064.29	8421.32	587.694	9009.01	6.5234
2	88.74	295	9064.29	8355.59	653.424	9009.01	7.25301
2	88.83	294	9064.29	8254.9	754.112	9009.01	8.37064
2	88.92	293	9064.29	8156.9	852.111	9009.01	9.45843
2	89.01	292	9064.29	8087.88	921.128	9009.01	10.2245
2	89.1	291	9064.29	7992.27	1016.74	9009.01	11.2858
2	89.19	290	9064.29	7922.06	1086.95	9009.01	12.0651
2	89.28	289	9064.29	7820.78	1188.23	9009.01	13.1894
2	89.37	288	9064.29	7755.34	1253.67	9009.01	13.9157
2	89.46	287	9064.29	7716.8	1292.21	9009.01	14.3435
2	89.55	286	9064.29	7699.47	1309.54	9009.01	14.5359
2	89.64	285	9064.29	7534.85	1474.16	9009.01	16.3632
2	89.73	284	9064.29	7441.33	1567.68	9009.01	17.4013
2	89.82	283	9064.29	7429.08	1579.93	9009.01	17.5372
2	89.91	282	9064.29	7490.03	1518.98	9009.01	16.8607
2	90	281	9064.29	7641.81	1367.2	9009.01	15.1759
2	90.09	280	9064.29	7726.36	1282.65	9009.01	14.2374
2	90.18	279	9064.29	7752.95	1256.06	9009.01	13.9422
2	90.27	278	9064.29	7750.27	1258.75	9009.01	13.9721
2	90.36	277	9064.29	7685.73	1323.28	9009.01	14.6884
2	90.45	276	9064.29	7580.56	1428.45	9009.01	15.8558
2	90.54	275	9064.29	7483.46	1525.55	9009.01	16.9336
2	90.63	274	9064.29	7546.8	1462.21	9009.01	16.2306
2	90.72	273	9064.29	7675.27	1333.74	9009.01	14.8045
2	90.81	272	9064.29	7771.48	1237.53	9009.01	13.7366
2	90.9	271	9064.29	7767.59	1241.42	9009.01	13.7797
2	90.99	270	9064.29	7812.71	1196.3	9009.01	13.2789
2	91.08	269	9064.29	7915.49	1093.52	9009.01	12.1381
2	91.17	268	9064.29	7908.92	1100.1	9009.01	12.2111
2	91.26	267	9064.29	7891.29	1117.72	9009.01	12.4067
2	91.35	266	9064.29	7903.84	1105.17	9009.01	12.2674
2	91.44	265	9064.29	7888.3	1120.71	9009.01	12.4399
2	91.53	264	9064.29	7945.96	1063.05	9009.01	11.7998
2	91.62	263	9064.29	8004.23	1004.79	9009.01	11.1531
2	91.71	262	9064.29	8024.84	984.17	9009.01	10.9243
2	91.8	261	9064.29	8029.62	979.39	9009.01	10.8712
2	91.89	260	9064.29	8114.18	894.836	9009.01	9.93268
2	91.98	259	9064.29	8174.23	834.782	9009.01	9.26608
2	92.07	258	9064.29	8155.41	853.605	9009.01	9.47501
2	92.16	257	9064.29	8088.18	920.83	9009.01	10.2212
2	92.25	256	9064.29	8034.4	974.609	9009.01	10.8182
2	92.34	255	9064.29	7980.32	1028.69	9009.01	11.4184
2	92.43	254	9064.29	7967.18	1041.83	9009.01	11.5644
2	92.52	253	9064.29	7859.02	1149.99	9009.01	12.7649
2	92.61	252	9064.29	7752.06	1256.95	9009.01	13.9522
2	92.7	251	9064.29	7645.1	1363.92	9009.01	15.1395
2	92.79	250	9064.29	7563.53	1445.48	9009.01	16.0448
2	92.88	249	9064.29	7487.34	1521.67	9009.01	16.8905
2	92.97	248	9064.29	7377.09	1631.92	9009.01	18.1143
2	93.06	247	9064.29	7281.78	1727.23	9009.01	19.1722
2	93.15	246	9064.29	7278.5	1730.51	9009.01	19.2087
2	93.24	245	9064.29	7348.41	1660.6	9009.01	18.4327
2	93.33	244	9064.29	7412.65	1596.36	9009.01	17.7196
2	93.42	243	9064.29	7420.12	1588.89	9009.01	17.6367
2	93.51	242	9064.29	7437.15	1571.86	9009.01	17.4477
2	93.6	241	9064.29	7435.06	1573.96	9009.01	17.4709
2	93.69	240	9064.29	7433.86	1575.15	9009.01	17.4842
2	93.78	239	9064.29	7589.22	1419.79	9009.01	15.7596
2	93.87	238	9064.29	7666.61	1342.4	9009.01	14.9007
2	93.96	237	9064.29	7639.12	1369.89	9009.01	15.2058
2	94.05	236	9064.29	7547.99	1461.02	9009.01	16.2173
2	94.14	235	9064.29	7510.05	1498.96	9009.01	16.6385
2	94.23	234	9064.29	7551.88	1457.13	9009.01	16.1742
2	94.32	233	9064.29	7559.94	1449.07	9009.01	16.0846
2	94.41	232	9064.29	7602.07	1406.94	9009.01	15.617
2	94.5	231	9064.29	7615.52	1393.49	9009.01	15.4678
2	94.59	230	9064.29	7590.12	1418.89	9009.01	15.7497
2	94.68	229	9064.29	7550.38	1458.63	9009.01	16.1908
2	94.77	228	9064.29	7542.91	1466.1	9009.01	16.2737
2	94.86	227	9064.29	7638.52	1370.49	9009.01	15.2124
2	94.95	226	9064.29	7715.01	1294	9009.01	14.3634
2	95.04	225	9064.29	7649.58	1359.43	9009.01	15.0897
2	95.13	224	9064.29	7579.37	1429.65	9009.01	15.8691
2	95.22	223	9064.29	7508.26	1500.75	9009.01	16.6584
2	95.31	222	9064.29	7458.06	1550.95	9009.01	17.2155
2	95.4	221	9064.29	7574.88	1434.13	9009.01	15.9188
2	95.49	220	9064.29	7709.93	1299.08	9009.01	14.4198
2	95.58	219	9064.29	7710.23	1298.78	9009.01	14.4165
2	95.67	218	9064.29	7596.69	1412.32	9009.01	15.6767
2	95.76	217	9064.29	7624.78	1384.23	9009.01	15.365
2	95.85	216	9064.29	7691.11	1317.9	9009.01	14.6287
2	95.94	215	9064.29	7810.62	1198.39	9009.01	13.3022
2	96.03	214	9064.29	7797.47	1211.54	9009.01	13.4481
2	96.12	213	9064.29	7775.36	1233.65	9009.01	13.6935
2	96.21	212	9064.29	7704.85	1304.16	9009.01	14.4762
2	96.3	211	9064.29	7653.76	1355.25	9009.01	15.0433
2	96.39	210	9064.29	7727.86	1281.15	9009.01	14.2208
2	96.48	209	9064.29	7763.71	1245.3	9009.01	13.8228
2	96.57	208	9064.29	7772.97	1236.04	9009.01	13.72
2	96.66	207	9064.29	7762.52	1246.5	9009.01	13.8361
2	96.75	206	9064.29	7744.59	1264.42	9009.01	14.0351
2	96.84	205	9064.29	7724.57	1284.44	9009.01	14.2573
2	96.93	204	9064.29	7648.68	1360.33	9009.01	15.0997
2	97.02	203	9064.29	7715.91	1293.11	9009.01	14.3535
2	97.11	202	9064.29	7892.48	1116.53	9009.01	12.3935
2	97.2	201	9064.29	8004.82	1004.19	9009.01	11.1465
2	97.29	200	9064.29	8042.47	966.542	9009.01	10.7286
2	97.38	199	9064.29	7954.93	1054.08	9009.01	11.7003
2	97.47	198	9064.29	7937.6	1071.41	9009.01	11.8927
2	97.56	197	9064.29	7967.18	1041.83	9009.01	11.5644
2	97.65	196	9064.29	8114.47	894.537	9009.01	9.92936
2	97.74	195	9064.29	8266.25	742.759	9009.01	8.24462
2	97.83	194	9064.29	8384.87	624.144	9009.01	6.928
2	97.92	193	9064.29	8363.35	645.656	9009.01	7.16678
2	98.01	192	9064.29	8302.7	706.308	9009.01	7.84002
2	98.1	191	9064.29	8351.4	657.607	9009.01	7.29944
2	98.19	190	9064.29	8423.11	585.901	9009.01	6.5035
2	98.28	189	9064.29	8501.69	507.323	9009.01	5.63128
2	98.37	188	9064.29	8457.77	551.243	9009.01	6.11879
2	98.46	187	9064.29	8404.29	604.724	9009.01	6.71243
2	98.55	186	9064.29	8342.74	666.272	9009.01	7.39562
2	98.64	185	9064.29	8334.08	674.936	9009.01	7.49179
2	98.73	184	9064.29	8273.42	735.588	9009.01	8.16503
2	98.82	183	9064.29	8207.99	801.02	9009.01	8.89132
2	98.91	182	9064.29	8112.68	896.33	9009.01	9.94926
2	99	181	9064.29	8072.94	936.067	9009.01	10.3903
2	99.09	180	9064.29	8087.29	921.726	9009.01	10.2312
2	99.18	179	9064.29	8071.15	937.86	9009.01	10.4102
2	99.27	178	9064.29	8042.17	966.841	9009.01	10.7319
2	99.36	177	9064.29	7991.08	1017.93	9009.01	11.299
2	99.45	176	9064.29	7883.82	1125.19	9009.01	12.4896
2	99.54	175	9064.29	7782.23	1226.78	9009.01	13.6172
2	99.63	174	9064.29	7715.31	1293.7	9009.01	14.3601
2	99.72	173	9064.29	7701.86	1307.15	9009.01	14.5093
2	99.81	172	9064.29	7676.77	1332.24	9009.01	14.7879
2	99.9	171	9064.29	7673.48	1335.53	9009.01	14.8244
2	99.99	170	9064.29	7667.21	1341.81	9009.01	14.894
2	100.08	169	9064.29	7732.34	1276.67	9009.01	14.1711
2	100.17	168	9064.29	7862.01	1147	9009.01	12.7317
2	100.26	167	9064.29	7869.48	1139.53	9009.01	12.6488
2	100.35	166	9064.29	7857.23	1151.78	9009.01	12.7848
2	100.44	165	9064.29	7804.64	1204.37	9009.01	13.3685
2	100.53	164	9064.29	7874.26	1134.75	9009.01	12.5958
2	100.62	163	9064.29	7993.77	1015.24	9009.01	11.2692
2	100.71	162	9064.29	7962.4	1046.61	9009.01	11.6174
2	100.8	161	9064.29	7849.16	1159.85	9009.01	12.8743
2	100.89	160	9064.29	7701.56	1307.45	9009.01	14.5127
2	100.98	159	9064.29	7631.35	1377.66	9009.01	15.292
2	101.07	158	9064.29	7580.86	1428.15	9009.01	15.8525
2	101.16	157	9064.29	7578.17	1430.84	9009.01	15.8823
2	101.25	156	9064.29	7626.87	1382.14	9009.01	15.3418
2	101.34	155	9064.29	7823.17	1185.84	9009.01	13.1629
2	101.43	154	9064.29	7922.06	1086.95	9009.01	12.0651
2	101.52	153	9064.29	7993.17	1015.84	9009.01	11.2758
2	101.61	152	9064.29	8076.23	932.781	9009.01	10.3539
2	101.7	151	9064.29	8149.13	859.879	9009.01	9.54466
2	101.79	150	9064.29	8216.66	792.356	9009.01	8.79515
2	101.88	149	9064.29	8342.74	666.272	9009.01	7.39562
2	101.97	148	9064.29	8438.95	570.066	9009.01	6.32773
2	102.06	147	9064.29	8468.23	540.786	9009.01	6.00272
2	102.15	146	9064.29	8388.75	620.26	9009.01	6.88489
2	102.24	145	9064.29	8346.62	662.388	9009.01	7.3525
2	102.33	144	9064.29	8350.21	658.802	9009.01	7.31271
2	102.42	143	9064.29	8368.14	640.876	9009.01	7.11372
2	102.51	142	9064.29	8380.98	628.028	9009.01	6.97111
2	102.6	141	9064.29	8374.41	634.601	9009.01	7.04408
2	102.69	140	9064.29	8388.75	620.26	9009.01	6.88489
2	102.78	139	9064.29	8473.6	535.408	9009.01	5.94302
2	102.87	138	9064.29	8503.78	505.231	9009.01	5.60807
2	102.96	137	9064.29	8524.69	484.317	9009.01	5.37592
2	103.05	136	9064.29	8496.61	512.402	9009.01	5.68766
2	103.14	135	9064.29	8509.16	499.853	9009.01	5.54837
2	103.23	134	9064.29	8524.1	484.914	9009.01	5.38255
2	103.32	133	9064.29	8464.34	544.67	9009.01	6.04583
2	103.41	132	9064.29	8416.54	592.474	9009.01	6.57646
2	103.5	131	9064.29	8376.2	632.809	9009.01	7.02418
2	103.59	130	9064.29	8340.95	668.065	9009.01	7.41551
2	103.68	129	9064.29	8369.33	639.681	9009.01	7.10045
2	103.77	128	9064.29	8389.95	619.065	9009.01	6.87162
2	103.86	127	9064.29	8345.13	663.882	9009.01	7.36908
2	103.95	126	9064.29	8295.53	713.479	9009.01	7.91961
2	104.04	125	9064.29	8208.89	800.124	9009.01	8.88137
2	104.13	124	9064.29	8151.52	857.489	9009.01	9.51812
2	104.22	123	9064.29	8142.26	866.751	9009.01	9.62093
2	104.31	122	9064.29	8147.04	861.971	9009.01	9.56787
2	104.4	121	9064.29	8132.7	876.312	9009.01	9.72706
2	104.49	120	9064.29	8160.19	848.824	9009.01	9.42195
2	104.58	119	9064.29	8208.59	800.423	9009.01	8.88469
2	104.67	118	9064.29	8243.84	765.167	9009.01	8.49335
2	104.76	117	9064.29	8200.82	808.191	9009.01	8.97092
2	104.85	116	9064.29	8186.78	822.233	9009.01	9.12679
2	104.94	115	9064.29	8246.83	762.179	9009.01	8.46019
2	105.03	114	9064.29	8184.99	824.026	9009.01	9.14668
2	105.12	113	9064.29	8168.25	840.757	9009.01	9.3324
2	105.21	112	9064.29	8122.84	886.171	9009.01	9.8365
2	105.3	111	9064.29	8139.27	869.739	9009.01	9.6541
2	105.39	110	9064.29	8135.09	873.922	9009.01	9.70053
2	105.48	109	9064.29	8050.54	958.475	9009.01	10.6391
2	105.57	108	9064.29	8023.94	985.066	9009.01	10.9342
2	105.66	107	9064.29	8028.43	980.585	9009.01	10.8845
2	105.75	106	9064.29	7959.71	1049.3	9009.01	11.6473
2	105.84	105	9064.29	7963.29	1045.72	9009.01	11.6075
2	105.93	104	9064.29	7890.09	1118.92	9009.01	12.42
2	106.02	103	9064.29	7888.6	1120.41	9009.01	12.4366
2	106.11	102	9064.29	7946.26	1062.75	9009.01	11.7965
2	106.2	101	9064.29	8083.7	925.311	9009.01	10.271
2	106.29	100	9064.29	8240.56	768.453	9009.01	8.52983
2	106.38	99	9064.29	8371.42	637.589	9009.01	7.07724
2	106.47	98	9064.29	8371.12	637.888	9009.01	7.08056
2	106.56	97	9064.29	8324.81	684.198	9009.01	7.5946
2	106.65	96	9064.29	8197.53	811.477	9009.01	9.0074
2	106.74	95	9064.29	8131.5	877.507	9009.01	9.74032
2	106.83	94	9064.29	8174.83	834.184	9009.01	9.25944
2	106.92	93	9064.29	8225.92	783.094	9009.01	8.69234
2	107.01	92	9064.29	8252.81	756.204	9009.01	8.39386
2	107.1	91	9064.29	8329.59	679.418	9009.01	7.54154
2	107.19	90	9064.29	8422.51	586.498	9009.01	6.51013
2	107.28	89	9064.29	8445.22	563.791	9009.01	6.25808
2	107.37	88	9064.29	8427.59	581.419	9009.01	6.45375
2	107.46	87	9064.29	8411.76	597.254	9009.01	6.62952
2	107.55	86	9064.29	8426.7	582.316	9009.01	6.4637
2	107.64	85	9064.29	8421.92	587.096	9009.01	6.51676
2	107.73	84	9064.29	8383.07	625.937	9009.01	6.9479
2	107.82	83	9064.29	8369.93	639.083	9009.01	7.09382
2	107.91	82	9064.29	8393.53	615.48	9009.01	6.83182
2	108	81	9064.29	8424.01	585.005	9009.01	6.49355
2	108.09	80	9064.29	8331.98	677.028	9009.01	7.51501
2	108.18	79	9064.29	8284.18	724.832	9009.01	8.04563
2	108.27	78	9064.29	8305.09	703.918	9009.01	7.81348
2	108.36	77	9064.29	8283.88	725.131	9009.01	8.04895
2	108.45	76	9064.29	8201.42	807.593	9009.01	8.96428
2	108.54	75	9064.29	8128.22	880.793	9009.01	9.7768
2	108.63	74	9064.29	8099.83	909.177	9009.01	10.0919
2	108.72	73	9064.29	8119.85	889.159	9009.01	9.86966
2	108.81	72	9064.29	8154.51	854.501	9009.01	9.48496
2	108.9	71	9064.29	8177.22	831.794	9009.01	9.23291
2	108.99	70	9064.29	8159.29	849.721	9009.01	9.4319
2	109.08	69	9064.29	8135.99	873.025	9009.01	9.69058
2	109.17	68	9064.29	8095.65	913.36	9009.01	10.1383
2	109.26	67	9064.29	8099.54	909.476	9009.01	10.0952
2	109.35	66	9064.29	8086.99	922.025	9009.01	10.2345
2	109.44	65	9064.29	8022.75	986.262	9009.01	10.9475
2	109.53	64	9064.29	8023.65	985.365	9009.01	10.9376
2	109.62	63	9064.29	8040.08	968.933	9009.01	10.7551
2	109.71	62	9064.29	8055.62	953.396	9009.01	10.5827
2	109.8	61	9064.29	8093.56	915.452	9009.01	10.1615
2	109.89	60	9064.29	8199.03	809.983	9009.01	8.99081
2	109.98	59	9064.29	8220.54	788.471	9009.01	8.75203
2	110.07	58	9064.29	8226.22	782.795	9009.01	8.68902
2	110.16	57	9064.29	8291.65	717.363	9009.01	7.96272
2	110.25	56	9064.29	8331.98	677.028	9009.01	7.51501
2	110.34	55	9064.29	8370.53	638.486	9009.01	7.08719
2	110.43	54	9064.29	8391.44	617.571	9009.01	6.85504
2	110.52	53	9064.29	8342.74	666.272	9009.01	7.39562
2	110.61	52	9064.29	8331.09	677.924	9009.01	7.52496
2	110.7	51	9064.29	8322.72	686.29	9009.01	7.61782
2	110.79	50	9064.29	8321.83	687.186	9009.01	7.62777
2	110.88	49	9064.29	8283.28	725.728	9009.01	8.05558
2	110.97	48	9064.29	8217.85	791.16	9009.01	8.78188
2	111.06	47	9064.29	8242.65	766.362	9009.01	8.50662
2	111.15	46	9064.29	8270.14	738.875	9009.01	8.20151
2	111.24	45	9064.29	8235.18	773.831	9009.01	8.58953
2	111.33	44	9064.29	8058.3	950.707	9009.01	10.5528
2	111.42	43	9064.29	7961.2	1047.81	9009.01	11.6307
2	111.51	42	9064.29	7959.71	1049.3	9009.01	11.6473
2	111.6	41	9064.29	8044.26	964.75	9009.01	10.7087
2	111.69	40	9064.29	8104.32	904.696	9009.01	10.0421
2	111.78	39	9064.29	8188.57	820.441	9009.01	9.10689
2	111.87	38	9064.29	8314.06	694.954	9009.01	7.71399
2	111.96	37	9064.29	8326.9	682.107	9009.01	7.57139
2	112.05	36	9064.29	8371.12	637.888	9009.01	7.08056
2	112.14	35	9064.29	8363.06	645.955	9009.01	7.1701
2	112.23	34	9064.29	8414.74	594.267	9009.01	6.59636
2	112.32	33	9064.29	8493.62	515.39	9009.01	5.72082
2	112.41	32	9064.29	8540.23	468.781	9009.01	5.20346
2	112.5	31	9064.29	8564.73	444.281	9009.01	4.93152
2	112.59	30	9064.29	8585.94	423.068	9009.01	4.69605
2	112.68	29	9064.29	8571.9	437.11	9009.01	4.85192
2	112.77	28	9064.29	8576.08	432.927	9009.01	4.80549
2	112.86	27	9064.29	8589.53	419.482	9009.01	4.65625
2	112.95	26	9064.29	8577.88	431.135	9009.01	4.78559
2	113.04	25	9064.29	8591.02	417.988	9009.01	4.63967
2	113.13	24	9064.29	8609.25	399.763	9009.01	4.43737
2	113.22	23	9064.29	8609.55	399.464	9009.01	4.43405
2	113.31	22	9064.29	8631.06	377.952	9009.01	4.19527
2	113.4	21	9064.29	8643.61	365.404	9009.01	4.05598
2	113.49	20	9064.29	8592.82	416.196	9009.01	4.61977
2	113.58	19	9064.29	8566.22	442.787	9009.01	4.91493
2	113.67	18	9064.29	8585.05	423.964	9009.01	4.706
2	113.76	17	9064.29	8625.98	383.032	9009.01	4.25165
2	113.85	16	9064.29	8613.13	395.879	9009.01	4.39426
2	113.94	15	9064.29	8581.16	427.848	9009.01	4.74911
2	114.03	14	9064.29	8541.43	467.585	9009.01	5.1902
2	114.12	13	9064.29	8500.19	508.817	9009.01	5.64786
2	114.21	12	9064.29	8508.56	500.451	9009.01	5.555
2	114.3	11	9064.29	8516.03	492.981	9009.01	5.47209
2	114.39	10	9064.29	8565.93	443.086	9009.01	4.91825
2	114.48	9	9064.29	8541.43	467.585	9009.01	5.1902
2	114.57	8	9064.29	8496.91	512.103	9009.01	5.68434
2	114.66	7	9064.29	8513.04	495.969	9009.01	5.50526
2	114.75	6	9064.29	8588.93	420.08	9009.01	4.66289
2	114.84	5	9064.29	8648.69	360.325	9009.01	3.9996
2	114.93	4	9064.29	8687.53	321.484	9009.01	3.56847
2	115.02	3	9064.29	8766.11	242.905	9009.01	2.69625
1	115.11	1114	7984.07	8282.37	22.7821	8305.15	0.274313
1	115.2	1113	7984.07	8224.7	80.4494	8305.15	0.968668
1	115.29	1112	7984.07	8194.8	110.351	8305.15	1.3287
1	115.38	1111	7984.07	8183.05	122.098	8305.15	1.47015
1	115.47	1110	7984.07	8174.51	130.641	8305.15	1.57301
1	115.56	1109	7984.07	8187.68	117.47	8305.15	1.41443
1	115.65	1108	7984.07	8189.11	116.046	8305.15	1.39728
1	115.74	1107	7984.07	8188.39	116.758	8305.15	1.40585
1	115.83	1106	7984.07	8203.7	101.452	8305.15	1.22155
1	115.92	1105	7984.07	8215.8	89.3486	8305.15	1.07582
1	116.01	1104	7984.07	8222.57	82.5852	8305.15	0.994385
1	116.1	1103	7984.07	8210.11	95.0442	8305.15	1.1444
1	116.19	1102	7984.07	8181.63	123.522	8305.15	1.48729
1	116.28	1101	7984.07	8134.64	170.51	8305.15	2.05306
1	116.37	1100	7984.07	8100.11	205.039	8305.15	2.46882
1	116.46	1099	7984.07	8027.14	278.013	8305.15	3.34748
1	116.55	1098	7984.07	8002.93	302.219	8305.15	3.63894
1	116.64	1097	7984.07	8007.92	297.236	8305.15	3.57893
1	116.73	1096	7984.07	8045.29	259.859	8305.15	3.12888
1	116.82	1095	7984.07	8076.26	228.889	8305.15	2.75599
1	116.91	1094	7984.07	8095.84	209.311	8305.15	2.52025
1	117	1093	7984.07	8109.37	195.784	8305.15	2.35738
1	117.09	1092	7984.07	8097.98	207.175	8305.15	2.49454
1	117.18	1091	7984.07	8103.67	201.479	8305.15	2.42596
1	117.27	1090	7984.07	8157.42	147.728	8305.15	1.77875
1	117.36	1089	7984.07	8193.73	111.419	8305.15	1.34156
1	117.45	1088	7984.07	8200.5	104.655	8305.15	1.26013
1	117.54	1087	7984.07	8191.95	113.199	8305.15	1.36299
1	117.63	1086	7984.07	8172.73	132.421	8305.15	1.59445
1	117.72	1085	7984.07	8191.6	113.555	8305.15	1.36728
1	117.81	1084	7984.07	8206.9	98.2479	8305.15	1.18298
1	117.9	1083	7984.07	8215.8	89.3486	8305.15	1.07582
1	117.99	1082	7984.07	8222.57	82.5852	8305.15	0.994385
1	118.08	1081	7984.07	8224.7	80.4494	8305.15	0.968668
1	118.17	1080	7984.07	8227.55	77.6016	8305.15	0.934379
1	118.26	1079	7984.07	8239.3	65.8546	8305.15	0.792936
1	118.35	1078	7984.07	8242.5	62.6508	8305.15	0.754361
1	118.44	1077	7984.07	8237.16	67.9904	8305.15	0.818653
1	118.53	1076	7984.07	8235.03	70.1262	8305.15	0.84437
1	118.62	1075	7984.07	8240.37	64.7867	8305.15	0.780078
1	118.71	1074	7984.07	8246.42	58.7352	8305.15	0.707214
1	118.8	1073	7984.07	8249.26	55.8874	8305.15	0.672924
1	118.89	1072	7984.07	8257.1	48.056	8305.15	0.578629
1	118.98	1071	7984.07	8261.72	43.4284	8305.15	0.522909
1	119.07	1070	7984.07	8269.91	35.2411	8305.15	0.424328
1	119.16	1069	7984.07	8287.35	17.7985	8305.15	0.214307
1	119.25	1068	7984.07	8292.69	12.459	8305.15	0.150015
1	119.34	1067	7984.07	8292.34	12.8149	8305.15	0.154301
1	119.43	1066	7984.07	8296.96	8.18733	8305.15	0.0985813
1	119.52	1065	7984.07	8303.02	2.13582	8305.15	0.0257169
1	119.61	1064	7984.07	8305.15	0	8305.15	0
1	119.7	1063	7984.07	8305.15	0	8305.15	0
1	119.79	1062	7984.07	8305.15	0	8305.15	0
1	119.88	1061	7984.07	8305.15	0	8305.15	0
1	119.97	1060	7984.07	8305.15	0	8305.15	0
1	120.06	1059	7984.07	8305.15	0	8305.15	0
1	120.15	1058	7984.07	8303.37	1.77985	8305.15	0.0214307
1	120.24	1057	7984.07	8290.2	14.9508	8305.15	0.180018
1	120.33	1056	7984.07	8290.56	14.5948	8305.15	0.175732
1	120.42	1055	7984.07	8296.96	8.18733	8305.15	0.0985813
1	120.51	1054	7984.07	8304.44	0.711941	8305.15	0.00857229
1	120.6	1053	7984.07	8305.15	0	8305.15	0
1	120.69	1052	7984.07	8304.44	0.711941	8305.15	0.00857229
1	120.78	1051	7984.07	8296.61	8.5433	8305.15	0.102867
1	120.87	1050	7984.07	8272.76	32.3933	8305.15	0.390039
1	120.96	1049	7984.07	8272.05	33.1053	8305.15	0.398611
1	121.05	1048	7984.07	8279.88	25.2739	8305.15	0.304316
1	121.14	1047	7984.07	8277.39	27.7657	8305.15	0.334319
1	121.23	1046	7984.07	8268.49	36.665	8305.15	0.441473
1	121.32	1045	7984.07	8256.03	49.124	8305.15	0.591488
1	121.41	1044	7984.07	8254.6	50.5478	8305.15	0.608632
1	121.5	1043	7984.07	8245.71	59.4471	8305.15	0.715786
1	121.59	1042	7984.07	8225.42	79.7374	8305.15	0.960096
1	121.68	1041	7984.07	8210.11	95.0442	8305.15	1.1444
1	121.77	1040	7984.07	8173.09	132.065	8305.15	1.59016
1	121.86	1039	7984.07	8144.97	160.187	8305.15	1.92876
1	121.95	1038	7984.07	8132.86	172.29	8305.15	2.07449
1	122.04	1037	7984.07	8118.27	186.885	8305.15	2.25022
1	122.13	1036	7984.07	8101.18	203.971	8305.15	2.45596
1	122.22	1035	7984.07	8067.01	238.144	8305.15	2.86743
1	122.31	1034	7984.07	8059.89	245.264	8305.15	2.95315
1	122.4	1033	7984.07	8096.91	208.243	8305.15	2.50739
1	122.49	1032	7984.07	8107.23	197.92	8305.15	2.3831
1	122.58	1031	7984.07	8124.68	180.477	8305.15	2.17307
1	122.67	1030	7984.07	8117.56	187.597	8305.15	2.2588
1	122.76	1029	7984.07	8122.18	182.969	8305.15	2.20308
1	122.85	1028	7984.07	8128.23	176.917	8305.15	2.13021
1	122.94	1027	7984.07	8123.61	181.545	8305.15	2.18593
1	123.03	1026	7984.07	8146.39	158.763	8305.15	1.91162
1	123.12	1025	7984.07	8152.8	152.355	8305.15	1.83447
1	123.21	1024	7984.07	8146.39	158.763	8305.15	1.91162
1	123.3	1023	7984.07	8163.83	141.32	8305.15	1.7016
1	123.39	1022	7984.07	8199.43	105.723	8305.15	1.27298
1	123.48	1021	7984.07	8223.63	81.5173	8305.15	0.981527
1	123.57	1020	7984.07	8226.84	78.3136	8305.15	0.942951
1	123.66	1019	7984.07	8247.84	57.3113	8305.15	0.690069
1	123.75	1018	7984.07	8248.91	56.2434	8305.15	0.677211
1	123.84	1017	7984.07	8238.59	66.5665	8305.15	0.801509
1	123.93	1016	7984.07	8240.72	64.4307	8305.15	0.775792
1	124.02	1015	7984.07	8242.15	63.0068	8305.15	0.758647
1	124.11	1014	7984.07	8227.2	77.9576	8305.15	0.938665
1	124.2	1013	7984.07	8232.89	72.2621	8305.15	0.870087
1	124.29	1012	7984.07	8238.59	66.5665	8305.15	0.801509
1	124.38	1011	7984.07	8237.87	67.2785	8305.15	0.810081
1	124.47	1010	7984.07	8244.64	60.515	8305.15	0.728644
1	124.56	1009	7984.07	8255.67	49.4799	8305.15	0.595774
1	124.65	1008	7984.07	8258.16	46.9881	8305.15	0.565771
1	124.74	1007	7984.07	8249.62	55.5314	8305.15	0.668638
1	124.83	1006	7984.07	8246.42	58.7352	8305.15	0.707214
1	124.92	1005	7984.07	8252.83	52.3277	8305.15	0.630063
1	125.01	1004	7984.07	8257.45	47.7001	8305.15	0.574343
1	125.1	1003	7984.07	8259.94	45.2083	8305.15	0.54434
1	125.19	1002	7984.07	8265.64	39.5127	8305.15	0.475762
1	125.28	1001	7984.07	8278.46	26.6978	8305.15	0.321461
1	125.37	1000	7984.07	8284.15	21.0023	8305.15	0.252882
1	125.46	999	7984.07	8288.78	16.3747	8305.15	0.197163
1	125.55	998	7984.07	8290.2	14.9508	8305.15	0.180018
1	125.64	997	7984.07	8290.56	14.5948	8305.15	0.175732
1	125.73	996	7984.07	8294.12	11.0351	8305.15	0.13287
1	125.82	995	7984.07	8298.39	6.76344	8305.15	0.0814367
1	125.91	994	7984.07	8298.75	6.40747	8305.15	0.0771506
1	126	993	7984.07	8299.1	6.0515	8305.15	0.0728644
1	126.09	992	7984.07	8300.52	4.62762	8305.15	0.0557199
1	126.18	991	7984.07	8301.59	3.55971	8305.15	0.0428614
1	126.27	990	7984.07	8299.46	5.69553	8305.15	0.0685783
1	126.36	989	7984.07	8300.88	4.27165	8305.15	0.0514337
1	126.45	988	7984.07	8303.02	2.13582	8305.15	0.0257169
1	126.54	987	7984.07	8303.02	2.13582	8305.15	0.0257169
1	126.63	986	7984.07	8304.44	0.711941	8305.15	0.00857229
1	126.72	985	7984.07	8304.44	0.711941	8305.15	0.00857229
1	126.81	984	7984.07	8304.44	0.711941	8305.15	0.00857229
1	126.9	983	7984.07	8304.08	1.06791	8305.15	0.0128584
1	126.99	982	7984.07	8305.15	0	8305.15	0
1	127.08	981	7984.07	8299.46	5.69553	8305.15	0.0685783
1	127.17	980	7984.07	8291.27	13.8829	8305.15	0.16716
1	127.26	979	7984.07	8266.35	38.8008	8305.15	0.46719
1	127.35	978	7984.07	8231.47	73.6859	8305.15	0.887232
1	127.44	977	7984.07	8226.84	78.3136	8305.15	0.942951
1	127.53	976	7984.07	8231.47	73.6859	8305.15	0.887232
1	127.62	975	7984.07	8231.82	73.33	8305.15	0.882945
1	127.71	974	7984.07	8217.23	87.9248	8305.15	1.05868
1	127.8	973	7984.07	8221.86	83.2971	8305.15	1.00296
1	127.89	972	7984.07	8265.64	39.5127	8305.15	0.475762
1	127.98	971	7984.07	8279.88	25.2739	8305.15	0.304316
1	128.07	970	7984.07	8265.64	39.5127	8305.15	0.475762
1	128.16	969	7984.07	8228.26	76.8897	8305.15	0.925807
1	128.25	968	7984.07	8217.23	87.9248	8305.15	1.05868
1	128.34	967	7984.07	8225.42	79.7374	8305.15	0.960096
1	128.43	966	7984.07	8218.65	86.5009	8305.15	1.04153
1	128.52	965	7984.07	8212.6	92.5524	8305.15	1.1144
1	128.61	964	7984.07	8185.9	119.25	8305.15	1.43586
1	128.7	963	7984.07	8165.61	139.541	8305.15	1.68017
1	128.79	962	7984.07	8145.68	159.475	8305.15	1.92019
1	128.88	961	7984.07	8137.49	167.662	8305.15	2.01877
1	128.97	960	7984.07	8143.9	161.255	8305.15	1.94162
1	129.06	959	7984.07	8160.27	144.88	8305.15	1.74446
1	129.15	958	7984.07	8174.51	130.641	8305.15	1.57301
1	129.24	957	7984.07	8184.83	120.318	8305.15	1.44872
1	129.33	956	7984.07	8200.5	104.655	8305.15	1.26013
1	129.42	955	7984.07	8216.87	88.2807	8305.15	1.06296
1	129.51	954	7984.07	8236.09	69.0583	8305.15	0.831512
1	129.6	953	7984.07	8246.77	58.3792	8305.15	0.702927
1	129.69	952	7984.07	8243.57	61.5829	8305.15	0.741503
1	129.78	951	7984.07	8226.13	79.0255	8305.15	0.951524
1	129.87	950	7984.07	8221.86	83.2971	8305.15	1.00296
1	129.96	949	7984.07	8219.36	85.7889	8305.15	1.03296
1	130.05	948	7984.07	8215.8	89.3486	8305.15	1.07582
1	130.14	947	7984.07	8214.02	91.1285	8305.15	1.09725
1	130.23	946	7984.07	8211.18	93.9763	8305.15	1.13154
1	130.32	945	7984.07	8207.26	97.8919	8305.15	1.17869
1	130.41	944	7984.07	8199.79	105.367	8305.15	1.2687
1	130.5	943	7984.07	8188.04	117.114	8305.15	1.41014
1	130.59	942	7984.07	8175.58	129.573	8305.15	1.56016
1	130.68	941	7984.07	8158.49	146.66	8305.15	1.76589
1	130.77	940	7984.07	8155.65	149.508	8305.15	1.80018
1	130.86	939	7984.07	8149.95	155.203	8305.15	1.86876
1	130.95	938	7984.07	8136.78	168.374	8305.15	2.02735
1	131.04	937	7984.07	8122.9	182.257	8305.15	2.19451
1	131.13	936	7984.07	8101.18	203.971	8305.15	2.45596
1	131.22	935	7984.07	8105.81	199.344	8305.15	2.40024
1	131.31	934	7984.07	8102.25	202.903	8305.15	2.4431
1	131.4	933	7984.07	8087.3	217.854	8305.15	2.62312
1	131.49	932	7984.07	8048.85	256.299	8305.15	3.08602
1	131.58	931	7984.07	7998.31	306.847	8305.15	3.69466
1	131.67	930	7984.07	7957.01	348.139	8305.15	4.19185
1	131.76	929	7984.07	7943.49	361.666	8305.15	4.35472
1	131.85	928	7984.07	7916.43	388.72	8305.15	4.68047
1	131.94	927	7984.07	7863.39	441.76	8305.15	5.3191
1	132.03	926	7984.07	7819.25	485.9	8305.15	5.85059
1	132.12	925	7984.07	7792.55	512.598	8305.15	6.17205
1	132.21	924	7984.07	7785.79	519.361	8305.15	6.25348
1	132.3	923	7984.07	7766.57	538.584	8305.15	6.48493
1	132.39	922	7984.07	7763.72	541.431	8305.15	6.51922
1	132.48	921	7984.07	7772.26	532.888	8305.15	6.41636
1	132.57	920	7984.07	7813.91	491.24	8305.15	5.91488
1	132.66	919	7984.07	7832.78	472.373	8305.15	5.68771
1	132.75	918	7984.07	7803.59	501.563	8305.15	6.03918
1	132.84	917	7984.07	7712.11	593.047	8305.15	7.14071
1	132.93	916	7984.07	7619.55	685.6	8305.15	8.25511
1	133.02	915	7984.07	7549.78	755.37	8305.15	9.09519
1	133.11	914	7984.07	7454.03	851.126	8305.15	10.2482
1	133.2	913	7984.07	7380.34	924.812	8305.15	11.1354
1	133.29	912	7984.07	7282.09	1023.06	8305.15	12.3184
1	133.38	911	7984.07	7183.49	1121.66	8305.15	13.5056
1	133.47	910	7984.07	7108.38	1196.77	8305.15	14.41
1	133.56	909	7984.07	7040.74	1264.41	8305.15	15.2244
1	133.65	908	7984.07	6996.96	1308.19	8305.15	15.7516
1	133.74	907	7984.07	6919.36	1385.79	8305.15	16.686
1	133.83	906	7984.07	6851.72	1453.43	8305.15	17.5003
1	133.92	905	7984.07	6815.06	1490.09	8305.15	17.9418
1	134.01	904	7984.07	6941.07	1364.08	8305.15	16.4245
1	134.1	903	7984.07	7085.95	1219.2	8305.15	14.68
1	134.19	902	7984.07	7143.62	1161.53	8305.15	13.9857
1	134.28	901	7984.07	7267.14	1038.01	8305.15	12.4984
1	134.37	900	7984.07	7410.6	894.554	8305.15	10.7711
1	134.46	899	7984.07	7476.45	828.7	8305.15	9.97814
1	134.55	898	7984.07	7584.67	720.485	8305.15	8.67515
1	134.64	897	7984.07	7659.07	646.087	8305.15	7.77935
1	134.73	896	7984.07	7714.95	590.199	8305.15	7.10642
1	134.82	895	7984.07	7786.15	519.005	8305.15	6.2492
1	134.91	894	7984.07	7823.17	481.984	8305.15	5.80344
1	135	893	7984.07	7871.58	433.572	8305.15	5.22052
1	135.09	892	7984.07	7900.77	404.383	8305.15	4.86906
1	135.18	891	7984.07	7935.65	369.498	8305.15	4.44902
1	135.27	890	7984.07	7968.05	337.104	8305.15	4.05898
1	135.36	889	7984.07	7981.22	323.933	8305.15	3.90039
1	135.45	888	7984.07	7988.34	316.814	8305.15	3.81467
1	135.54	887	7984.07	7989.05	316.102	8305.15	3.8061
1	135.63	886	7984.07	7985.85	319.306	8305.15	3.84467
1	135.72	885	7984.07	7996.17	308.983	8305.15	3.72037
1	135.81	884	7984.07	7999.37	305.779	8305.15	3.6818
1	135.9	883	7984.07	8016.82	288.336	8305.15	3.47178
1	135.99	882	7984.07	8007.56	297.592	8305.15	3.58322
1	136.08	881	7984.07	7993.32	311.83	8305.15	3.75466
1	136.17	880	7984.07	7983.35	321.798	8305.15	3.87467
1	136.26	879	7984.07	7987.63	317.526	8305.15	3.82324
1	136.35	878	7984.07	7989.41	315.746	8305.15	3.80181
1	136.44	877	7984.07	7986.91	318.238	8305.15	3.83181
1	136.53	876	7984.07	7938.86	366.294	8305.15	4.41044
1	136.62	875	7984.07	7931.74	373.413	8305.15	4.49616
1	136.71	874	7984.07	7905.4	399.755	8305.15	4.81334
1	136.8	873	7984.07	7827.44	477.713	8305.15	5.752
1	136.89	872	7984.07	7766.57	538.584	8305.15	6.48493
1	136.98	871	7984.07	7723.85	581.3	8305.15	6.99927
1	137.07	870	7984.07	7668.32	636.832	8305.15	7.66791
1	137.16	869	7984.07	7626.67	678.48	8305.15	8.16939
1	137.25	868	7984.07	7654.44	650.714	8305.15	7.83507
1	137.34	867	7984.07	7689.32	615.829	8305.15	7.41503
1	137.43	866	7984.07	7720.65	584.504	8305.15	7.03785
1	137.52	865	7984.07	7716.73	588.42	8305.15	7.08499
1	137.61	864	7984.07	7707.83	597.319	8305.15	7.19215
1	137.7	863	7984.07	7741.65	563.502	8305.15	6.78496
1	137.79	862	7984.07	7773.33	531.82	8305.15	6.4035
1	137.88	861	7984.07	7797.18	507.97	8305.15	6.11633
1	137.97	860	7984.07	7841.32	463.83	8305.15	5.58484
1	138.06	859	7984.07	7895.07	410.078	8305.15	4.93764
1	138.15	858	7984.07	7944.2	360.954	8305.15	4.34615
1	138.24	857	7984.07	8004	301.151	8305.15	3.62608
1	138.33	856	7984.07	8054.55	250.603	8305.15	3.01744
1	138.42	855	7984.07	8080.54	224.618	8305.15	2.70456
1	138.51	854	7984.07	8096.55	208.599	8305.15	2.51168
1	138.6	853	7984.07	8125.39	179.765	8305.15	2.1645
1	138.69	852	7984.07	8157.07	148.084	8305.15	1.78304
1	138.78	851	7984.07	8167.75	137.405	8305.15	1.65445
1	138.87	850	7984.07	8163.12	142.032	8305.15	1.71017
1	138.96	849	7984.07	8134.64	170.51	8305.15	2.05306
1	139.05	848	7984.07	8107.94	197.208	8305.15	2.37452
1	139.14	847	7984.07	8070.92	234.229	8305.15	2.82028
1	139.23	846	7984.07	8042.09	263.062	8305.15	3.16746
1	139.32	845	7984.07	8006.49	298.659	8305.15	3.59607
1	139.41	844	7984.07	7967.69	337.46	8305.15	4.06326
1	139.5	843	7984.07	7959.15	346.004	8305.15	4.16613
1	139.59	842	7984.07	8000.09	305.067	8305.15	3.67322
1	139.68	841	7984.07	8014.32	290.828	8305.15	3.50178
1	139.77	840	7984.07	8029.28	275.877	8305.15	3.32176
1	139.86	839	7984.07	7996.88	308.271	8305.15	3.7118
1	139.95	838	7984.07	7939.93	365.226	8305.15	4.39758
1	140.04	837	7984.07	7942.06	363.09	8305.15	4.37187
1	140.13	836	7984.07	8004	301.151	8305.15	3.62608
1	140.22	835	7984.07	8096.91	208.243	8305.15	2.50739
1	140.31	834	7984.07	8122.18	182.969	8305.15	2.20308
1	140.4	833	7984.07	8148.17	156.983	8305.15	1.89019
1	140.49	832	7984.07	8181.63	123.522	8305.15	1.48729
1	140.58	831	7984.07	8193.38	111.775	8305.15	1.34585
1	140.67	830	7984.07	8182.34	122.81	8305.15	1.47872
1	140.76	829	7984.07	8180.21	124.946	8305.15	1.50444
1	140.85	828	7984.07	8198.72	106.435	8305.15	1.28156
1	140.94	827	7984.07	8235.03	70.1262	8305.15	0.84437
1	141.03	826	7984.07	8247.84	57.3113	8305.15	0.690069
1	141.12	825	7984.07	8249.62	55.5314	8305.15	0.668638
1	141.21	824	7984.07	8227.91	77.2456	8305.15	0.930093
1	141.3	823	7984.07	8182.7	122.454	8305.15	1.47443
1	141.39	822	7984.07	8150.66	154.491	8305.15	1.86019
1	141.48	821	7984.07	8157.07	148.084	8305.15	1.78304
1	141.57	820	7984.07	8163.83	141.32	8305.15	1.7016
1	141.66	819	7984.07	8187.33	117.826	8305.15	1.41871
1	141.75	818	7984.07	8195.87	109.283	8305.15	1.31585
1	141.84	817	7984.07	8197.29	107.859	8305.15	1.2987
1	141.93	816	7984.07	8193.38	111.775	8305.15	1.34585
1	142.02	815	7984.07	8185.19	119.962	8305.15	1.44443
1	142.11	814	7984.07	8202.28	102.876	8305.15	1.2387
1	142.2	813	7984.07	8223.63	81.5173	8305.15	0.981527
1	142.29	812	7984.07	8230.75	74.3979	8305.15	0.895804
1	142.38	811	7984.07	8228.97	76.1777	8305.15	0.917235
1	142.47	810	7984.07	8240.37	64.7867	8305.15	0.780078
1	142.56	809	7984.07	8248.91	56.2434	8305.15	0.677211
1	142.65	808	7984.07	8253.89	51.2598	8305.15	0.617205
1	142.74	807	7984.07	8250.69	54.4635	8305.15	0.65578
1	142.83	806	7984.07	8243.57	61.5829	8305.15	0.741503
1	142.92	805	7984.07	8239.3	65.8546	8305.15	0.792936
1	143.01	804	7984.07	8235.03	70.1262	8305.15	0.84437
1	143.1	803	7984.07	8237.87	67.2785	8305.15	0.810081
1	143.19	802	7984.07	8240.37	64.7867	8305.15	0.780078
1	143.28	801	7984.07	8242.5	62.6508	8305.15	0.754361
1	143.37	800	7984.07	8237.16	67.9904	8305.15	0.818653
1	143.46	799	7984.07	8223.63	81.5173	8305.15	0.981527
1	143.55	798	7984.07	8235.03	70.1262	8305.15	0.84437
1	143.64	797	7984.07	8241.79	63.3628	8305.15	0.762933
1	143.73	796	7984.07	8244.28	60.871	8305.15	0.73293
1	143.82	795	7984.07	8240.01	65.1426	8305.15	0.784364
1	143.91	794	7984.07	8221.5	83.6531	8305.15	1.00724
1	144	793	7984.07	8209.75	95.4001	8305.15	1.14869
1	144.09	792	7984.07	8205.84	99.3158	8305.15	1.19583
1	144.18	791	7984.07	8202.63	102.52	8305.15	1.23441
1	144.27	790	7984.07	8197.29	107.859	8305.15	1.2987
1	144.36	789	7984.07	8186.97	118.182	8305.15	1.423
1	144.45	788	7984.07	8172.38	132.777	8305.15	1.59873
1	144.54	787	7984.07	8142.83	162.323	8305.15	1.95448
1	144.63	786	7984.07	8128.59	176.561	8305.15	2.12593
1	144.72	785	7984.07	8111.5	193.648	8305.15	2.33166
1	144.81	784	7984.07	8082.31	222.838	8305.15	2.68313
1	144.9	783	7984.07	8018.6	286.556	8305.15	3.45035
1	144.99	782	7984.07	7959.5	345.648	8305.15	4.16184
1	145.08	781	7984.07	7945.27	359.886	8305.15	4.33329
1	145.17	780	7984.07	7952.03	353.123	8305.15	4.25185
1	145.26	779	7984.07	7917.5	387.652	8305.15	4.66761
1	145.35	778	7984.07	7865.88	439.268	8305.15	5.2891
1	145.44	777	7984.07	7851.65	453.507	8305.15	5.46055
1	145.53	776	7984.07	7876.92	428.233	8305.15	5.15623
1	145.62	775	7984.07	7847.37	457.778	8305.15	5.51198
1	145.71	774	7984.07	7779.74	525.413	8305.15	6.32635
1	145.8	773	7984.07	7655.86	649.291	8305.15	7.81793
1	145.89	772	7984.07	7638.42	666.733	8305.15	8.02795
1	145.98	771	7984.07	7663.69	641.459	8305.15	7.72363
1	146.07	770	7984.07	7679.71	625.441	8305.15	7.53075
1	146.16	769	7984.07	7609.59	695.567	8305.15	8.37512
1	146.25	768	7984.07	7583.96	721.197	8305.15	8.68373
1	146.34	767	7984.07	7526.29	778.864	8305.15	9.37808
1	146.43	766	7984.07	7522.73	782.424	8305.15	9.42094
1	146.52	765	7984.07	7535.54	769.609	8305.15	9.26664
1	146.61	764	7984.07	7551.92	753.234	8305.15	9.06948
1	146.7	763	7984.07	7628.45	676.7	8305.15	8.14796
1	146.79	762	7984.07	7694.31	610.846	8305.15	7.35502
1	146.88	761	7984.07	7696.44	608.71	8305.15	7.3293
1	146.97	760	7984.07	7628.81	676.344	8305.15	8.14367
1	147.06	759	7984.07	7593.92	711.229	8305.15	8.56371
1	147.15	758	7984.07	7622.4	682.752	8305.15	8.22082
1	147.24	757	7984.07	7740.94	564.214	8305.15	6.79354
1	147.33	756	7984.07	7853.43	451.727	8305.15	5.43912
1	147.42	755	7984.07	7905.4	399.755	8305.15	4.81334
1	147.51	754	7984.07	7917.86	387.296	8305.15	4.66332
1	147.6	753	7984.07	7924.98	380.177	8305.15	4.5776
1	147.69	752	7984.07	7904.33	400.823	8305.15	4.8262
1	147.78	751	7984.07	7863.39	441.76	8305.15	5.3191
1	147.87	750	7984.07	7844.88	460.27	8305.15	5.54198
1	147.96	749	7984.07	7796.11	509.038	8305.15	6.12918
1	148.05	748	7984.07	7721.72	583.436	8305.15	7.02499
1	148.14	747	7984.07	7655.51	649.647	8305.15	7.82221
1	148.23	746	7984.07	7624.54	680.616	8305.15	8.1951
1	148.32	745	7984.07	7637.71	667.445	8305.15	8.03652
1	148.41	744	7984.07	7611.37	693.787	8305.15	8.35369
1	148.5	743	7984.07	7503.51	801.646	8305.15	9.65239
1	148.59	742	7984.07	7403.48	901.674	8305.15	10.8568
1	148.68	741	7984.07	7366.46	938.695	8305.15	11.3026
1	148.77	740	7984.07	7310.21	994.938	8305.15	11.9798
1	148.86	739	7984.07	7254.68	1050.47	8305.15	12.6484
1	148.95	738	7984.07	7225.85	1079.3	8305.15	12.9956
1	149.04	737	7984.07	7222.29	1082.86	8305.15	13.0384
1	149.13	736	7984.07	7251.84	1053.32	8305.15	12.6827
1	149.22	735	7984.07	7297.4	1007.75	8305.15	12.1341
1	149.31	734	7984.07	7387.46	917.692	8305.15	11.0497
1	149.4	733	7984.07	7484.28	820.868	8305.15	9.88385
1	149.49	732	7984.07	7610.65	694.499	8305.15	8.36226
1	149.58	731	7984.07	7666.54	638.611	8305.15	7.68934
1	149.67	730	7984.07	7696.09	609.066	8305.15	7.33359
1	149.76	729	7984.07	7662.63	642.527	8305.15	7.73649
1	149.85	728	7984.07	7636.64	668.513	8305.15	8.04938
1	149.94	727	7984.07	7656.57	648.579	8305.15	7.80935
1	150.03	726	7984.07	7745.92	559.23	8305.15	6.73353
1	150.12	725	7984.07	7779.38	525.769	8305.15	6.33063
1	150.21	724	7984.07	7843.1	462.05	8305.15	5.56341
1	150.3	723	7984.07	7906.11	399.043	8305.15	4.80477
1	150.39	722	7984.07	7910.02	395.127	8305.15	4.75762
1	150.48	721	7984.07	7853.43	451.727	8305.15	5.43912
1	150.57	720	7984.07	7737.74	567.417	8305.15	6.83211
1	150.66	719	7984.07	7664.05	641.103	8305.15	7.71934
1	150.75	718	7984.07	7649.81	655.342	8305.15	7.89079
1	150.84	717	7984.07	7648.39	656.766	8305.15	7.90793
1	150.93	716	7984.07	7618.84	686.312	8305.15	8.26368
1	151.02	715	7984.07	7522.73	782.424	8305.15	9.42094
1	151.11	714	7984.07	7503.15	802.002	8305.15	9.65668
1	151.2	713	7984.07	7464.71	840.447	8305.15	10.1196
1	151.29	712	7984.07	7391.38	913.777	8305.15	11.0025
1	151.38	711	7984.07	7244.72	1060.44	8305.15	12.7684
1	151.47	710	7984.07	7084.17	1220.98	8305.15	14.7015
1	151.56	709	7984.07	7032.2	1272.95	8305.15	15.3272
1	151.65	708	7984.07	7046.08	1259.07	8305.15	15.1601
1	151.74	707	7984.07	7036.47	1268.68	8305.15	15.2758
1	151.83	706	7984.07	7006.22	1298.94	8305.15	15.6401
1	151.92	705	7984.07	6963.5	1341.65	8305.15	16.1545
1	152.01	704	7984.07	6921.49	1383.66	8305.15	16.6602
1	152.1	703	7984.07	6915.8	1389.35	8305.15	16.7288
1	152.19	702	7984.07	6985.93	1319.23	8305.15	15.8844
1	152.28	701	7984.07	7053.2	1251.95	8305.15	15.0744
1	152.37	700	7984.07	7082.04	1223.12	8305.15	14.7272
1	152.46	699	7984.07	7116.21	1188.94	8305.15	14.3157
1	152.55	698	7984.07	7177.08	1128.07	8305.15	13.5828
1	152.64	697	7984.07	7200.58	1104.58	8305.15	13.2999
1	152.73	696	7984.07	7220.87	1084.29	8305.15	13.0556
1	152.82	695	7984.07	7164.62	1140.53	8305.15	13.7328
1	152.91	694	7984.07	7155.37	1149.79	8305.15	13.8442
1	153	693	7984.07	7176.01	1129.14	8305.15	13.5956
1	153.09	692	7984.07	7116.21	1188.94	8305.15	14.3157
1	153.18	691	7984.07	6990.91	1314.24	8305.15	15.8244
1	153.27	690	7984.07	6957.45	1347.71	8305.15	16.2273
1	153.36	689	7984.07	7041.81	1263.34	8305.15	15.2115
1	153.45	688	7984.07	7108.38	1196.77	8305.15	14.41
1	153.54	687	7984.07	7219.8	1085.35	8305.15	13.0684
1	153.63	686	7984.07	7334.06	971.088	8305.15	11.6926
1	153.72	685	7984.07	7417.72	887.435	8305.15	10.6854
1	153.81	684	7984.07	7518.46	786.695	8305.15	9.47238
1	153.9	683	7984.07	7582.53	722.621	8305.15	8.70087
1	153.99	682	7984.07	7653.73	651.426	8305.15	7.84364
1	154.08	681	7984.07	7729.19	575.961	8305.15	6.93498
1	154.17	680	7984.07	7770.84	534.312	8305.15	6.4335
1	154.26	679	7984.07	7782.23	522.921	8305.15	6.29634
1	154.35	678	7984.07	7814.27	490.884	8305.15	5.91059
1	154.44	677	7984.07	7924.98	380.177	8305.15	4.5776
1	154.53	676	7984.07	8031.41	273.741	8305.15	3.29604
1	154.62	675	7984.07	8058.11	247.044	8305.15	2.97458
1	154.71	674	7984.07	8047.07	258.079	8305.15	3.10745
1	154.8	673	7984.07	7988.69	316.458	8305.15	3.81038
1	154.89	672	7984.07	7910.74	394.416	8305.15	4.74905
1	154.98	671	7984.07	7852.71	452.439	8305.15	5.44769
1	155.07	670	7984.07	7755.18	549.975	8305.15	6.62209
1	155.16	669	7984.07	7702.85	602.302	8305.15	7.25215
1	155.25	668	7984.07	7686.83	618.321	8305.15	7.44503
1	155.34	667	7984.07	7654.79	650.358	8305.15	7.83078
1	155.43	666	7984.07	7586.8	718.349	8305.15	8.64944
1	155.52	665	7984.07	7529.49	775.66	8305.15	9.33951
1	155.61	664	7984.07	7440.86	864.297	8305.15	10.4068
1	155.7	663	7984.07	7289.57	1015.58	8305.15	12.2284
1	155.79	662	7984.07	7230.48	1074.68	8305.15	12.9399
1	155.88	661	7984.07	7289.92	1015.23	8305.15	12.2241
1	155.97	660	7984.07	7480.37	824.784	8305.15	9.93099
1	156.06	659	7984.07	7621.33	683.82	8305.15	8.23368
1	156.15	658	7984.07	7686.48	618.677	8305.15	7.44932
1	156.24	657	7984.07	7781.52	523.633	8305.15	6.30492
1	156.33	656	7984.07	7881.55	423.605	8305.15	5.10051
1	156.42	655	7984.07	7966.27	338.884	8305.15	4.08041
1	156.51	654	7984.07	8038.17	266.978	8305.15	3.21461
1	156.6	653	7984.07	8064.16	240.992	8305.15	2.90172
1	156.69	652	7984.07	8053.48	251.671	8305.15	3.0303
1	156.78	651	7984.07	8063.8	241.348	8305.15	2.906
1	156.87	650	7984.07	8087.65	217.498	8305.15	2.61883
1	156.96	649	7984.07	8102.6	202.547	8305.15	2.43882
1	157.05	648	7984.07	8088.01	217.142	8305.15	2.61455
1	157.14	647	7984.07	8123.25	181.901	8305.15	2.19022
1	157.23	646	7984.07	8167.04	138.117	8305.15	1.66302
1	157.32	645	7984.07	8179.14	126.014	8305.15	1.51729
1	157.41	644	7984.07	8204.77	100.384	8305.15	1.20869
1	157.5	643	7984.07	8231.11	74.0419	8305.15	0.891518
1	157.59	642	7984.07	8242.86	62.2949	8305.15	0.750075
1	157.68	641	7984.07	8245.35	59.8031	8305.15	0.720072
1	157.77	640	7984.07	8248.55	56.5993	8305.15	0.681497
1	157.86	639	7984.07	8247.49	57.6673	8305.15	0.694355
1	157.95	638	7984.07	8270.98	34.1732	8305.15	0.41147
1	158.04	637	7984.07	8280.95	24.206	8305.15	0.291458
1	158.13	636	7984.07	8289.49	15.6627	8305.15	0.18859
1	158.22	635	7984.07	8298.03	7.11941	8305.15	0.0857229
1	158.31	634	7984.07	8298.75	6.40747	8305.15	0.0771506
1	158.4	633	7984.07	8301.24	3.91568	8305.15	0.0471476
1	158.49	632	7984.07	8304.8	0.355971	8305.15	0.00428614
1	158.58	631	7984.07	8305.15	0	8305.15	0
1	158.67	630	7984.07	8297.68	7.47538	8305.15	0.090009
1	158.76	629	7984.07	8293.76	11.3911	8305.15	0.137157
1	158.85	628	7984.07	8288.42	16.7306	8305.15	0.201449
1	158.94	627	7984.07	8269.56	35.5971	8305.15	0.428614
1	159.03	626	7984.07	8225.42	79.7374	8305.15	0.960096
1	159.12	625	7984.07	8176.65	128.505	8305.15	1.5473
1	159.21	624	7984.07	8100.47	204.683	8305.15	2.46453
1	159.3	623	7984.07	8019.66	285.488	8305.15	3.43749
1	159.39	622	7984.07	7986.91	318.238	8305.15	3.83181
1	159.48	621	7984.07	7975.88	329.273	8305.15	3.96468
1	159.57	620	7984.07	7977.66	327.493	8305.15	3.94325
1	159.66	619	7984.07	8014.68	290.472	8305.15	3.49749
1	159.75	618	7984.07	8038.53	266.622	8305.15	3.21032
1	159.84	617	7984.07	8049.92	255.231	8305.15	3.07316
1	159.93	616	7984.07	8030.7	274.453	8305.15	3.30462
1	160.02	615	7984.07	8027.85	277.301	8305.15	3.33891
1	160.11	614	7984.07	8041.02	264.13	8305.15	3.18032
1	160.2	613	7984.07	8058.82	246.332	8305.15	2.96601
1	160.29	612	7984.07	8089.43	215.718	8305.15	2.5974
1	160.38	611	7984.07	8119.34	185.817	8305.15	2.23737
1	160.47	610	7984.07	8146.03	159.119	8305.15	1.91591
1	160.56	609	7984.07	8160.98	144.168	8305.15	1.73589
1	160.65	608	7984.07	8160.27	144.88	8305.15	1.74446
1	160.74	607	7984.07	8163.83	141.32	8305.15	1.7016
1	160.83	606	7984.07	8163.48	141.676	8305.15	1.70589
1	160.92	605	7984.07	8163.83	141.32	8305.15	1.7016
1	161.01	604	7984.07	8174.87	130.285	8305.15	1.56873
1	161.1	603	7984.07	8179.14	126.014	8305.15	1.51729
1	161.19	602	7984.07	8174.51	130.641	8305.15	1.57301
1	161.28	601	7984.07	8165.61	139.541	8305.15	1.68017
1	161.37	600	7984.07	8152.44	152.711	8305.15	1.83876
1	161.46	599	7984.07	8121.47	183.681	8305.15	2.21165
1	161.55	598	7984.07	8106.88	198.276	8305.15	2.38738
1	161.64	597	7984.07	8126.81	178.341	8305.15	2.14736
1	161.73	596	7984.07	8127.52	177.629	8305.15	2.13879
1	161.82	595	7984.07	8101.54	203.615	8305.15	2.45167
1	161.91	594	7984.07	8074.48	230.669	8305.15	2.77742
1	162	593	7984.07	8038.17	266.978	8305.15	3.21461
1	162.09	592	7984.07	8008.98	296.168	8305.15	3.56607
1	162.18	591	7984.07	7971.25	333.901	8305.15	4.0204
1	162.27	590	7984.07	7891.51	413.638	8305.15	4.9805
1	162.36	589	7984.07	7765.5	539.652	8305.15	6.49779
1	162.45	588	7984.07	7669.39	635.764	8305.15	7.65505
1	162.54	587	7984.07	7581.11	724.044	8305.15	8.71802
1	162.63	586	7984.07	7467.55	837.599	8305.15	10.0853
1	162.72	585	7984.07	7365.39	939.763	8305.15	11.3154
1	162.81	584	7984.07	7288.5	1016.65	8305.15	12.2412
1	162.9	583	7984.07	7237.24	1067.91	8305.15	12.8584
1	162.99	582	7984.07	7198.44	1106.71	8305.15	13.3256
1	163.08	581	7984.07	7093.07	1212.08	8305.15	14.5943
1	163.17	580	7984.07	6957.8	1347.35	8305.15	16.2231
1	163.26	579	7984.07	6831.79	1473.36	8305.15	17.7403
1	163.35	578	7984.07	6758.1	1547.05	8305.15	18.6276
1	163.44	577	7984.07	6719.3	1585.85	8305.15	19.0948
1	163.53	576	7984.07	6565.88	1739.27	8305.15	20.9421
1	163.62	575	7984.07	6523.52	1781.63	8305.15	21.4521
1	163.71	574	7984.07	6559.47	1745.68	8305.15	21.0192
1	163.8	573	7984.07	6692.96	1612.19	8305.15	19.4119
1	163.89	572	7984.07	6804.74	1500.42	8305.15	18.0661
1	163.98	571	7984.07	6842.82	1462.33	8305.15	17.6075
1	164.07	570	7984.07	6905.83	1399.32	8305.15	16.8488
1	164.16	569	7984.07	6893.37	1411.78	8305.15	16.9988
1	164.25	568	7984.07	6971.33	1333.82	8305.15	16.0602
1	164.34	567	7984.07	7066.02	1239.13	8305.15	14.9201
1	164.43	566	7984.07	7152.16	1152.99	8305.15	13.8828
1	164.52	565	7984.07	7113.01	1192.15	8305.15	14.3543
1	164.61	564	7984.07	7106.6	1198.55	8305.15	14.4314
1	164.7	563	7984.07	7127.25	1177.91	8305.15	14.1828
1	164.79	562	7984.07	7172.45	1132.7	8305.15	13.6385
1	164.88	561	7944.91	7170.32	1173.99	8344.31	14.0694
1	164.97	560	7986.56	7127.25	1175.42	8302.66	14.1571
1	165.06	559	7986.56	7098.06	1204.6	8302.66	14.5087
1	165.15	558	7986.56	7108.02	1194.64	8302.66	14.3886
1	165.24	557	7986.56	7203.42	1099.24	8302.66	13.2396
1	165.33	556	7986.56	7231.54	1071.12	8302.66	12.9009
1	165.42	555	7986.56	7254.68	1047.98	8302.66	12.6222
1	165.51	554	7986.56	7284.94	1017.72	8302.66	12.2578
1	165.6	553	7986.56	7314.13	988.531	8302.66	11.9062
1	165.69	552	7986.56	7325.88	976.784	8302.66	11.7647
1	165.78	551	7986.56	7319.83	982.835	8302.66	11.8376
1	165.87	550	7986.56	7317.69	984.971	8302.66	11.8633
1	165.96	549	7986.56	7323.03	979.631	8302.66	11.799
1	166.05	548	7986.56	7262.87	1039.79	8302.66	12.5236
1	166.14	547	7986.56	7278.18	1024.48	8302.66	12.3392
1	166.23	546	7986.56	7289.21	1013.45	8302.66	12.2063
1	166.32	545	7986.56	7269.28	1033.38	8302.66	12.4464
1	166.41	544	7986.56	7318.05	984.615	8302.66	11.859
1	166.5	543	7986.56	7367.88	934.779	8302.66	11.2588
1	166.59	542	7986.56	7397.43	905.234	8302.66	10.9029
1	166.68	541	7986.56	7509.2	793.459	8302.66	9.55668
1	166.77	540	7986.56	7575.06	727.604	8302.66	8.76351
1	166.86	539	7986.56	7660.13	642.527	8302.66	7.73881
1	166.95	538	7986.56	7739.87	562.79	8302.66	6.77843
1	167.04	537	7986.56	7746.63	556.026	8302.66	6.69696
1	167.13	536	7986.56	7743.79	558.874	8302.66	6.73126
1	167.22	535	7986.56	7772.98	529.684	8302.66	6.37969
1	167.31	534	7986.56	7803.23	499.427	8302.66	6.01526
1	167.4	533	7986.56	7819.25	483.408	8302.66	5.82233
1	167.49	532	7986.56	7796.47	506.19	8302.66	6.09672
1	167.58	531	7986.56	7739.16	563.502	8302.66	6.787
1	167.67	530	7986.56	7682.92	619.745	8302.66	7.46441
1	167.76	529	7986.56	7729.55	573.113	8302.66	6.90276
1	167.85	528	7986.56	7782.94	519.717	8302.66	6.25965
1	167.94	527	7986.56	7749.48	553.178	8302.66	6.66266
1	168.03	526	7986.56	7689.68	612.982	8302.66	7.38295
1	168.12	525	7986.56	7635.93	666.733	8302.66	8.03036
1	168.21	524	7986.56	7555.48	747.183	8302.66	8.99931
1	168.3	523	7986.56	7421.28	881.383	8302.66	10.6157
1	168.39	522	7986.56	7339.76	962.901	8302.66	11.5975
1	168.48	521	7986.56	7306.65	996.006	8302.66	11.9962
1	168.57	520	7986.56	7234.75	1067.91	8302.66	12.8623
1	168.66	519	7986.56	7205.91	1096.75	8302.66	13.2096
1	168.75	518	7986.56	7105.89	1196.77	8302.66	14.4143
1	168.84	517	7986.56	6944.63	1358.03	8302.66	16.3565
1	168.93	516	7986.56	6892.66	1410	8302.66	16.9825
1	169.02	515	7986.56	6885.19	1417.48	8302.66	17.0725
1	169.11	514	7986.56	6843.18	1459.48	8302.66	17.5785
1	169.2	513	7986.56	6899.78	1402.88	8302.66	16.8968
1	169.29	512	7986.56	6922.21	1380.45	8302.66	16.6266
1	169.38	511	7986.56	6854.22	1448.44	8302.66	17.4455
1	169.47	510	7986.56	6729.63	1573.03	8302.66	18.9461
1	169.56	509	7986.56	6689.4	1613.26	8302.66	19.4306
1	169.65	508	7986.56	6678.01	1624.65	8302.66	19.5678
1	169.74	507	7986.56	6763.8	1538.86	8302.66	18.5346
1	169.83	506	7986.56	6815.77	1486.89	8302.66	17.9086
1	169.92	505	7986.56	6834.28	1468.38	8302.66	17.6856
1	170.01	504	7986.56	6776.61	1526.05	8302.66	18.3802
1	170.1	503	7986.56	6725.35	1577.31	8302.66	18.9976
1	170.19	502	7986.56	6716.1	1586.56	8302.66	19.1091
1	170.28	501	7986.56	6762.38	1540.29	8302.66	18.5517
1	170.37	500	7986.56	6869.17	1433.49	8302.66	17.2655
1	170.46	499	7986.56	6996.25	1306.41	8302.66	15.7349
1	170.55	498	7986.56	7085.6	1217.06	8302.66	14.6587
1	170.64	497	7986.56	7163.91	1138.75	8302.66	13.7155
1	170.73	496	7986.56	7200.93	1101.73	8302.66	13.2696
1	170.82	495	7986.56	7176.37	1126.29	8302.66	13.5654
1	170.91	494	7986.56	7135.43	1167.23	8302.66	14.0585
1	171	493	7986.56	7077.05	1225.61	8302.66	14.7616
1	171.09	492	7986.56	6993.4	1309.26	8302.66	15.7692
1	171.18	491	7986.56	6928.97	1373.69	8302.66	16.5452
1	171.27	490	7986.56	6843.54	1459.12	8302.66	17.5742
1	171.36	489	7986.56	6787.65	1515.01	8302.66	18.2473
1	171.45	488	7986.56	6775.19	1527.47	8302.66	18.3974
1	171.54	487	7986.56	6787.29	1515.37	8302.66	18.2516
1	171.63	486	7986.56	6753.12	1549.54	8302.66	18.6632
1	171.72	485	7986.56	6701.86	1600.8	8302.66	19.2806
1	171.81	484	7986.56	6714.68	1587.99	8302.66	19.1262
1	171.9	483	7986.56	6795.48	1507.18	8302.66	18.153
1	171.99	482	7986.56	6904.41	1398.25	8302.66	16.841
1	172.08	481	7986.56	6974.53	1328.13	8302.66	15.9964
1	172.17	480	7986.56	6997.32	1305.34	8302.66	15.722
1	172.26	479	7986.56	6931.11	1371.56	8302.66	16.5195
1	172.35	478	7986.56	6815.41	1487.25	8302.66	17.9129
1	172.44	477	7986.56	6679.08	1623.58	8302.66	19.555
1	172.53	476	7986.56	6742.8	1559.86	8302.66	18.7875
1	172.62	475	7986.56	6898.71	1403.95	8302.66	16.9096
1	172.71	474	7986.56	6916.87	1385.79	8302.66	16.691
1	172.8	473	7986.56	6881.27	1421.39	8302.66	17.1197
1	172.89	472	7986.56	6912.24	1390.42	8302.66	16.7467
1	172.98	471	7986.56	6963.5	1339.16	8302.66	16.1293
1	173.07	470	7986.56	6967.06	1335.6	8302.66	16.0864
1	173.16	469	7986.56	7080.97	1221.69	8302.66	14.7145
1	173.25	468	7986.56	7131.87	1170.79	8302.66	14.1014
1	173.34	467	7986.56	7078.83	1223.83	8302.66	14.7402
1	173.43	466	7986.56	7093.07	1209.59	8302.66	14.5687
1	173.52	465	7986.56	7159.64	1143.02	8302.66	13.7669
1	173.61	464	7986.56	7202.71	1099.95	8302.66	13.2482
1	173.7	463	7986.56	7197.02	1105.64	8302.66	13.3168
1	173.79	462	7986.56	7238.31	1064.35	8302.66	12.8194
1	173.88	461	7986.56	7174.59	1128.07	8302.66	13.5869
1	173.97	460	7986.56	7093.78	1208.88	8302.66	14.5601
1	174.06	459	7986.56	7049.29	1253.37	8302.66	15.096
1	174.15	458	7986.56	7050	1252.66	8302.66	15.0875
1	174.24	457	7986.56	7022.59	1280.07	8302.66	15.4176
1	174.33	456	7986.56	7029.71	1272.95	8302.66	15.3318
1	174.42	455	7986.56	7051.07	1251.59	8302.66	15.0746
1	174.51	454	7986.56	7018.67	1283.99	8302.66	15.4648
1	174.6	453	7986.56	6990.2	1312.46	8302.66	15.8078
1	174.69	452	7986.56	6965.28	1337.38	8302.66	16.1079
1	174.78	451	7986.56	6966.35	1336.31	8302.66	16.095
1	174.87	450	7986.56	6948.9	1353.76	8302.66	16.3051
1	174.96	449	7986.56	6865.25	1437.41	8302.66	17.3126
1	175.05	448	7986.56	6902.27	1400.39	8302.66	16.8667
1	175.14	447	7986.56	6960.65	1342.01	8302.66	16.1636
1	175.23	446	7986.56	7010.49	1292.17	8302.66	15.5634
1	175.32	445	7986.56	7054.98	1247.68	8302.66	15.0274
1	175.41	444	7986.56	7083.46	1219.2	8302.66	14.6844
1	175.5	443	7986.56	7088.44	1214.22	8302.66	14.6244
1	175.59	442	7986.56	7059.97	1242.69	8302.66	14.9674
1	175.68	441	7986.56	7014.4	1288.26	8302.66	15.5162
1	175.77	440	7986.56	7059.97	1242.69	8302.66	14.9674
1	175.86	439	7986.56	7061.39	1241.27	8302.66	14.9503
1	175.95	438	7986.56	7022.95	1279.71	8302.66	15.4133
1	176.04	437	7986.56	6948.55	1354.11	8302.66	16.3094
1	176.13	436	7986.56	6855.28	1447.38	8302.66	17.4327
1	176.22	435	7986.56	6779.11	1523.55	8302.66	18.3502
1	176.31	434	7986.56	6739.24	1563.42	8302.66	18.8304
1	176.4	433	7986.56	6639.92	1662.74	8302.66	20.0266
1	176.49	432	7986.56	6497.18	1805.48	8302.66	21.7458
1	176.58	431	7986.56	6470.12	1832.54	8302.66	22.0717
1	176.67	430	7986.56	6378.64	1924.02	8302.66	23.1736
1	176.76	429	7986.56	6356.57	1946.09	8302.66	23.4394
1	176.85	428	7986.56	6353.72	1948.94	8302.66	23.4737
1	176.94	427	7986.56	6394.66	1908	8302.66	22.9806
1	177.03	426	7986.56	6523.88	1778.79	8302.66	21.4243
1	177.12	425	7986.56	6694.03	1608.63	8302.66	19.3749
1	177.21	424	7986.56	6838.55	1464.11	8302.66	17.6342
1	177.3	423	7986.56	6944.28	1358.38	8302.66	16.3608
1	177.39	422	7986.56	7059.97	1242.69	8302.66	14.9674
1	177.48	421	7986.56	7127.25	1175.42	8302.66	14.1571
1	177.57	420	7986.56	7151.81	1150.85	8302.66	13.8613
1	177.66	419	7986.56	7247.21	1055.45	8302.66	12.7122
1	177.75	418	7986.56	7232.26	1070.4	8302.66	12.8923
1	177.84	417	7986.56	7183.13	1119.53	8302.66	13.484
1	177.93	416	7986.56	7125.82	1176.84	8302.66	14.1742
1	178.02	415	7986.56	7110.87	1191.79	8302.66	14.3543
1	178.11	414	7986.56	7074.56	1228.1	8302.66	14.7916
1	178.2	413	7986.56	6967.06	1335.6	8302.66	16.0864
1	178.29	412	7986.56	6957.09	1345.57	8302.66	16.2065
1	178.38	411	7986.56	6947.12	1355.54	8302.66	16.3265
1	178.47	410	7986.56	6990.91	1311.75	8302.66	15.7992
1	178.56	409	7986.56	7152.16	1150.5	8302.66	13.857
1	178.65	408	7986.56	7353.29	949.374	8302.66	11.4346
1	178.74	407	7986.56	7475.74	826.92	8302.66	9.9597
1	178.83	406	7986.56	7544.09	758.574	8302.66	9.13651
1	178.92	405	7986.56	7556.9	745.759	8302.66	8.98216
1	179.01	404	7986.56	7576.12	726.536	8302.66	8.75064
1	179.1	403	7986.56	7540.17	762.489	8302.66	9.18367
1	179.19	402	7986.56	7456.52	846.142	8302.66	10.1912
1	179.28	401	7986.56	7379.27	923.388	8302.66	11.1216
1	179.37	400	7986.56	7311.99	990.666	8302.66	11.9319
1	179.46	399	7986.56	7291.35	1011.31	8302.66	12.1806
1	179.55	398	7986.56	7190.96	1111.7	8302.66	13.3896
1	179.64	397	7986.56	7066.37	1236.29	8302.66	14.8902
1	179.73	396	7986.56	7017.61	1285.05	8302.66	15.4776
[truncated: 391 more rows]

## Sheet: Tabelle1
Depth	Coral Volume %
0	2.25118
0.09	2.68881
0.18	2.63908
0.27	2.48657
0.36	2.36059
0.45	2.31085
0.54	2.10198
0.63	1.87653
0.72	1.38917
0.81	1.20019
0.9	1.39911
0.99	1.84006
1.08	1.70745
1.17	1.65772
1.26	1.42895
1.35	1.51515
1.44	1.58146
1.53	1.57483
1.62	1.419
1.71	1.33612
1.8	1.24992
1.89	1.49857
1.98	1.67429
2.07	1.75055
2.16	2.0622
2.25	2.40369
2.34	2.11856
2.43	1.9992
2.52	2.00584
2.61	2.03236
2.7	1.67429
2.79	1.47537
2.88	1.3759
2.97	1.30628
3.06	1.36596
3.15	1.71408
3.24	1.61461
3.33	1.6544
3.42	2.02904
3.51	2.06551
3.6	1.86659
3.69	1.63782
3.78	2.05557
3.87	2.18155
3.96	2.43353
4.05	2.27107
4.14	1.90969
4.23	1.5251
4.32	1.64114
4.41	1.85996
4.5	1.53173
4.59	1.3527
4.68	1.04768
4.77	1.26981
4.86	1.11067
4.95	0.974736
5.04	1.27644
5.13	1.36596
5.22	1.47537
5.31	1.9992
5.4	2.49983
5.49	3.12313
5.58	3.76633
5.67	3.96857
5.76	3.99841
5.85	4.55209
5.94	5.16544
6.03	5.01293
6.12	4.27359
6.21	3.78954
6.3	3.96525
6.39	4.25701
6.48	3.82269
6.57	3.37179
6.66	2.86785
6.75	2.81812
6.84	2.96731
6.93	2.98389
7.02	2.98389
7.11	2.52304
7.2	2.6424
7.29	2.3639
7.38	1.99589
7.47	1.61793
7.56	1.21013
7.65	0.944898
7.74	0.729395
7.83	0.981367
7.92	1.55162
8.01	1.41569
8.1	0.981367
8.19	0.888535
8.28	0.948213
8.37	0.828858
8.46	0.484053
8.55	0.467476
8.64	0.795703
8.73	0.968106
8.82	1.20682
8.91	1.50189
9	1.74723
9.09	1.89974
9.18	1.72402
9.27	1.38917
9.36	1.72402
9.45	2.35727
9.54	3.33201
9.63	3.28891
9.72	2.98057
9.81	3.67018
9.9	4.32332
9.99	4.54877
10.08	5.308
10.17	5.02619
10.26	4.84384
10.35	4.44268
10.44	4.23712
10.53	4.40952
10.62	4.84716
10.71	5.08255
10.8	5.02288
10.89	4.70791
10.98	5.15881
11.07	5.34779
11.16	4.76096
11.25	3.99178
11.34	3.90558
11.43	4.52556
11.52	6.14349
11.61	7.26411
11.7	8.11617
11.79	8.12612
11.88	9.45229
11.97	10.1187
12.06	10.6094
12.15	10.4701
12.24	10.2911
12.33	10.7188
12.42	11.667
12.51	12.34
12.6	13.4673
12.69	13.633
12.78	13.3943
12.87	13.4673
12.96	14.0574
13.05	14.4089
13.14	15.4167
13.23	15.503
13.32	14.9758
13.41	14.4917
13.5	13.2617
13.59	12.9468
13.68	11.8792
13.77	10.8514
13.86	10.679
13.95	10.4436
14.04	9.6479
14.13	11.1365
14.22	12.2704
14.31	12.5887
14.4	12.5821
14.49	12.4594
14.58	12.9733
14.67	13.8486
14.76	14.7238
14.85	14.7205
14.94	14.5348
15.03	13.958
15.12	13.9115
15.21	14.6376
15.3	15.8113
15.39	16.2158
15.48	15.745
15.57	14.6608
15.66	14.3857
15.75	14.1038
15.84	13.7093
15.93	13.4905
16.02	14.7271
16.11	14.8664
16.2	14.7802
16.29	14.5315
16.38	14.0773
16.47	13.9115
16.56	14.3691
16.65	15.5958
16.74	15.2344
16.83	14.7404
16.92	13.9977
17.01	14.8034
17.1	16.8789
17.19	16.2357
17.28	12.9799
17.37	11.289
17.46	11.6968
17.55	11.9455
17.64	12.2936
17.73	12.2538
17.82	11.5211
17.91	10.6359
18	8.97818
18.09	7.67854
18.18	6.47172
18.27	5.57655
18.36	5.23838
18.45	4.96983
18.54	4.55872
18.63	4.65486
18.72	5.24501
18.81	5.9943
18.9	6.42199
18.99	5.6296
19.08	5.40747
19.17	6.00424
19.26	6.62755
19.35	6.00756
19.44	6.22638
19.53	6.85962
19.62	7.27405
19.71	7.84099
19.8	9.00802
19.89	9.87998
19.98	9.5617
20.07	8.83894
20.16	8.65659
20.25	8.99808
20.34	10.9973
20.43	12.4693
20.52	13.1192
20.61	13.5734
20.7	14.8034
20.79	15.9804
20.88	18.5233
20.97	19.4218
21.06	18.8582
21.15	16.5871
21.24	14.4254
21.33	13.0993
21.42	11.8924
21.51	11.173
21.6	12.0317
21.69	14.2099
21.78	15.1117
21.87	16.0599
21.96	15.8444
22.05	16.9186
22.14	16.7496
22.23	17.7177
22.32	19.561
22.41	19.4351
22.5	18.7189
22.59	18.4835
22.68	19.3024
22.77	17.4292
22.86	14.7702
22.95	12.8539
23.04	11.8195
23.13	10.3541
23.22	10.0822
23.31	10.2082
23.4	10.9078
23.49	11.0271
23.58	11.1829
23.67	11.9488
23.76	12.8904
23.85	12.6119
23.94	12.0516
24.03	12.4892
24.12	12.539
24.21	12.4395
24.3	12.5356
24.39	13.4573
24.48	13.6198
24.57	13.1192
24.66	13.9381
24.75	13.8121
24.84	13.8386
24.93	13.9248
25.02	12.3201
25.11	11.1564
25.2	11.2128
25.29	11.1962
25.38	10.3939
25.47	9.97281
25.56	10.4171
25.65	11.7267
25.74	12.3864
25.83	12.8241
25.92	13.7226
26.01	14.9228
26.1	15.1847
26.19	14.9194
26.28	13.517
26.37	12.3599
26.46	12.0052
26.55	11.9886
26.64	12.0284
26.73	10.868
26.82	10.616
26.91	10.6458
27	10.4933
27.09	10.7254
27.18	11.3156
27.27	12.1942
27.36	13.0628
27.45	12.7876
27.54	11.7366
27.63	11.7963
27.72	11.6703
27.81	11.1631
27.9	10.6094
27.99	10.0889
28.08	9.87335
28.17	10.0623
28.26	10.1784
28.35	8.94503
28.44	8.05649
28.53	8.32173
28.62	8.14081
28.71	7.96182
28.8	6.84146
28.89	6.22825
28.98	5.88352
29.07	5.88684
29.16	5.63824
29.25	5.97965
29.34	6.07577
29.43	6.04926
29.52	5.97302
29.61	5.25042
29.7	4.60075
29.79	3.99748
29.88	3.40416
29.97	2.90696
30.06	2.44622
30.15	2.41639
30.24	2.88375
30.33	2.80752
30.42	2.17773
30.51	2.17442
30.6	1.92582
30.69	1.96559
30.78	2.19099
30.87	2.486
30.96	2.47937
31.05	2.44291
31.14	2.41307
31.23	2.26391
31.32	1.95565
31.41	1.77334
31.5	1.42199
31.59	1.25957
31.68	1.14024
31.77	0.911532
31.86	0.957937
31.95	1.04412
32.04	1.26289
32.13	1.42862
32.22	1.2894
32.31	1.12367
32.4	1.29603
32.49	1.23968
32.58	1.16345
32.67	0.792204
32.76	0.609898
32.85	0.54029
32.94	0.49057
33.03	0.477311
33.12	0.44085
33.21	0.414333
33.3	0.619842
33.39	0.818721
33.48	0.92479
33.57	0.861812
33.66	1.1071
33.75	1.58772
33.84	1.62087
33.93	1.44519
34.02	1.10378
34.11	0.719281
34.2	0.427591
34.29	0.434221
34.38	0.394445
34.47	0.261858
34.56	0.414333
34.65	0.835295
34.74	1.0176
34.83	0.868441
34.92	0.805463
35.01	0.911532
35.1	0.686135
35.19	0.513772
35.28	0.414333
35.37	0.404389
35.46	0.430906
35.55	0.351354
35.64	0.288375
35.73	0.265173
35.82	0.24197
35.91	0.182306
36	0.122642
36.09	0.132586
36.18	0.321522
36.27	0.255229
36.36	0.218768
36.45	0.182306
36.54	0.119328
36.63	0.116013
36.72	0.132586
36.81	0.129272
36.9	0.0762372
36.99	0.0563492
37.08	0.0762372
37.17	0.215453
37.26	0.298319
37.35	0.328151
37.44	0.318207
37.53	0.384501
37.62	0.692764
37.71	0.527031
37.8	0.321522
37.89	0.288375
37.98	0.377871
38.07	0.430906
38.16	0.503828
38.25	0.460891
38.34	0.344839
38.43	0.39126
38.52	0.520574
38.61	0.616731
38.7	0.749362
38.79	0.600153
38.88	0.427733
38.97	0.368049
39.06	0.351471
39.15	0.43768
39.24	0.503995
39.33	0.543785
39.42	0.487417
39.51	0.447628
39.6	0.394575
39.69	0.440996
39.78	0.427733
39.87	0.212209
39.96	0.0795782
40.05	0.013263
40.14	0.155841
40.23	0.255313
40.32	0.540469
40.41	1.06104
40.5	1.23015
40.59	1.07431
40.68	0.752677
40.77	0.537153
40.86	0.344839
40.95	0.371365
41.04	0.169104
41.13	0
41.22	0
41.31	0.0198946
41.4	0.145893
41.49	0.192314
41.58	0.102789
41.67	0.0596837
41.76	0.0364734
41.85	0.0298418
41.94	0.467522
42.03	0.477469
42.12	0.318313
42.21	0.149209
42.3	0.119367
42.39	0.0464206
42.48	0.0464206
42.57	0.0331576
42.66	0.0795782
42.75	0.106104
42.84	0.112736
42.93	0.125999
43.02	0.0928413
43.11	0.0464206
43.2	0.0265261
43.29	0.00331576
43.38	0.0298418
43.47	0.0530522
43.56	0.0663152
43.65	0.00663152
43.74	0.0331576
43.83	0.0198946
43.92	0.0198946
44.01	0.0232103
44.1	0.0464206
44.19	0.0530522
44.28	0.0364734
44.37	0.0265261
44.46	0.013263
44.55	0.159156
44.64	0.285155
44.73	0.122683
44.82	0.0232103
44.91	0.0265261
45	0.119367
45.09	0.188998
45.18	0.348155
45.27	0.480785
45.36	0.474154
45.45	0.39126
45.54	0.215524
45.63	0.275208
45.72	0.450943
45.81	0.484101
45.9	0.321629
45.99	0.225472
46.08	0.434365
46.17	0.50068
46.26	0.460891
46.35	0.474154
46.44	0.401207
46.53	0.394575
46.62	0.513943
46.71	0.404523
46.8	0.364734
46.89	0.291787
46.98	0.21884
47.07	0.0895255
47.16	0.106104
47.25	0.21884
47.34	0.251998
47.43	0.21884
47.52	0.222156
47.61	0.271892
47.7	0.460891
47.79	0.616731
47.88	0.96157
47.97	1.14725
48.06	1.21025
48.15	1.58825
48.24	2.24145
48.33	2.38735
48.42	2.19172
48.51	2.09556
48.6	2.37408
48.69	2.38072
48.78	2.86813
48.87	4.3138
48.96	4.63875
49.05	4.57906
49.14	4.47296
49.23	4.48622
49.32	3.85954
49.41	3.19308
49.5	3.0306
49.59	3.0936
49.68	3.04055
49.77	2.80182
49.86	2.2083
49.95	2.47356
50.04	2.66587
50.13	2.2083
50.22	2.27793
50.31	2.21161
50.4	1.92314
50.49	1.37936
50.58	0.775888
50.67	0.706257
50.76	0.935044
50.85	0.82894
50.94	0.63331
51.03	0.676415
51.12	0.755993
51.21	0.590205
51.3	0.881992
51.39	1.25336
51.48	0.935044
51.57	0.858782
51.66	0.799098
51.75	0.712888
51.84	0.692994
51.93	1.31304
52.02	2.13867
52.11	2.67913
52.2	2.7985
52.29	2.38735
52.38	1.46888
52.47	1.12073
52.56	1.05773
52.65	1.0312
52.74	1.21025
52.83	1.45562
52.92	1.38599
53.01	1.09752
53.1	0.666468
53.19	0.726151
53.28	1.04778
53.37	1.31967
53.46	1.68109
53.55	1.5783
53.64	1.6413
53.73	2.16188
53.82	2.53656
53.91	2.89797
54	2.83166
54.09	2.53987
54.18	2.17514
54.27	2.08561
54.36	2.20498
54.45	2.5034
54.54	2.45698
54.63	2.60619
54.72	2.96097
54.81	3.03392
54.9	3.30913
54.99	3.48155
55.08	3.98886
55.17	5.17922
55.26	5.69648
55.35	5.76611
55.44	5.89211
55.53	6.60499
55.62	7.03604
55.71	6.55857
55.8	5.70642
55.89	5.18916
55.98	5.45111
56.07	5.82911
56.16	5.57048
56.25	5.63348
56.34	5.41132
56.43	4.9438
56.52	4.33038
56.61	4.26738
56.7	4.3337
56.79	5.24222
56.88	6.29
56.97	7.40078
57.06	7.88156
57.15	7.52677
57.24	6.75752
57.33	5.66663
57.42	4.57575
57.51	4.06871
57.6	3.56799
57.69	3.3193
57.78	2.94459
57.87	2.48035
57.96	2.29466
58.05	1.98959
58.14	1.80721
58.23	1.68783
58.32	2.04928
58.41	2.17197
58.5	1.49551
58.59	1.3695
58.68	1.57177
58.77	1.72763
58.86	1.85695
58.95	1.48887
59.04	1.18712
59.13	0.70962
59.22	0.37139
59.31	0.324966
59.4	0.28849
59.49	0.0994794
59.58	0.212223
59.67	0.590244
59.76	0.994794
59.85	1.21365
59.94	1.01801
60.03	0.958318
60.12	1.18049
60.21	1.33302
60.3	1.47229
60.39	1.63146
60.48	1.71105
60.57	1.7641
60.66	1.74421
60.75	1.76079
60.84	1.89674
60.93	2.02275
61.02	2.01612
61.11	1.8271
61.2	1.57509
61.29	1.19707
61.38	1.05117
61.47	0.872103
61.56	0.736147
61.65	0.540505
61.74	0.431077
61.83	0.248698
61.92	0.189011
62.01	0.175747
62.1	0.278542
62.19	0.225487
62.28	0.159167
62.37	0.25533
62.46	0.364758
62.55	0.795835
62.64	0.746095
62.73	0.348178
62.82	0.0762675
62.91	0.155851
63	0.324966
63.09	0.65988
63.18	1.08433
63.27	1.48887
63.36	1.72763
63.45	2.25487
63.54	2.75226
63.63	3.22313
63.72	3.24634
63.81	3.15018
63.9	3.06065
63.99	2.82853
64.08	2.25487
64.17	1.97632
64.26	1.98296
64.35	1.9929
64.44	1.92327
64.53	2.11891
64.62	1.89674
64.71	1.71768
64.8	1.55519
64.89	1.36287
64.98	1.30981
65.07	1.32639
65.16	0.925158
65.25	0.573665
65.34	0.441025
65.43	0.434393
65.52	0.431077
65.61	0.394602
65.7	0.401234
65.79	0.600192
65.88	0.7262
65.97	0.752727
66.06	0.61014
66.15	0.487449
66.24	0.351494
66.33	0.364758
66.42	0.533873
66.51	0.785887
66.6	1.04453
66.69	1.20038
66.78	1.39603
66.87	2.02938
66.96	2.32119
67.05	2.31455
67.14	2.19849
67.23	2.33777
67.32	2.56325
67.41	2.61962
67.5	2.37756
67.59	1.9929
67.68	1.30318
67.77	1.27002
67.86	1.23023
67.95	1.14733
68.04	1.17717
68.13	0.858839
68.22	0.407865
68.31	0.431077
68.4	0.756043
68.49	1.07106
68.58	1.36618
68.67	1.82047
68.76	2.40409
68.85	2.8849
68.94	3.08386
69.03	3.06397
69.12	3.19992
69.21	2.92801
69.3	2.36429
69.39	2.16533
69.48	1.91664
69.57	1.78068
69.66	1.86026
69.75	1.7641
69.84	1.58504
69.93	1.58504
70.02	1.99622
70.11	2.61299
70.2	2.94791
70.29	3.4453
70.38	3.66747
70.47	3.74706
70.56	4.70869
70.65	5.73665
70.74	6.05829
70.83	6.02182
70.92	6.09477
71.01	6.79444
71.1	7.2222
71.19	6.92045
71.28	6.58554
71.37	6.44958
71.46	6.69165
71.55	6.62201
71.64	6.05166
71.73	5.27904
71.82	4.4401
71.91	4.43015
72	5.18951
72.09	5.80296
72.18	6.86408
72.27	7.59691
72.36	7.64665
72.45	6.70159
72.54	5.61727
72.63	5.35531
72.72	4.97729
72.81	4.69211
72.9	4.5031
72.99	4.23782
73.08	3.88964
73.17	4.00902
73.26	4.14497
73.35	3.63431
73.44	3.71721
73.53	4.11181
73.62	4.98392
73.71	5.87592
73.8	6.95029
73.89	8.1142
73.98	8.81387
74.07	9.65613
74.16	11.1351
74.25	13.894
74.34	15.4923
74.43	15.0943
74.52	13.9536
74.61	12.8063
74.7	11.5197
74.79	10.7405
74.88	9.88494
74.97	8.48228
75.06	7.43443
75.15	7.75276
75.24	7.7395
75.33	6.37331
75.42	6.26057
75.51	6.34679
75.6	6.38658
75.69	7.57701
75.78	8.4657
75.87	8.41927
75.96	8.45243
76.05	8.06115
76.14	7.61681
76.23	7.04314
76.32	6.35673
76.41	6.52916
76.5	7.22884
76.59	7.16252
76.68	6.23404
76.77	5.50729
76.86	5.47414
76.95	5.45424
77.04	4.98011
77.13	4.95358
77.22	4.78448
77.31	4.48939
77.4	4.1744
77.49	4.09814
77.58	4.13462
77.67	3.82294
77.76	3.83289
77.85	4.08156
77.94	3.77984
78.03	3.7069
78.12	3.82294
78.21	3.35212
78.3	2.76857
78.39	2.82162
78.48	2.71552
78.57	2.67241
78.66	3.02387
78.75	3.18302
78.84	2.9874
78.93	2.85146
79.02	2.61936
79.11	2.31101
79.2	2.51658
79.29	3.28249
79.38	3.71684
79.47	3.64058
79.56	3.41844
79.65	2.90119
79.74	2.23475
79.83	1.74403
79.92	1.61472
80.01	1.51194
80.1	1.19695
80.19	1.0378
80.28	1.02122
80.37	0.974801
80.46	1.02454
80.55	1.03448
80.64	0.958223
80.73	0.835544
80.82	0.775862
80.91	0.825597
81	0.470822
81.09	0.785809
81.18	0.935013
81.27	0.669761
81.36	0.480769
81.45	0.722812
81.54	0.872016
81.63	0.89191
81.72	0.775862
81.81	0.978117
81.9	1.19032
81.99	1.37599
82.08	1.40915
82.17	1.13395
82.26	0.951592
82.35	0.732759
82.44	0.722812
82.53	0.374668
82.62	0.30504
82.71	0.275199
82.8	0.285146
82.89	0.338196
82.98	0.116048
83.07	0.142573
83.16	0.318302
83.25	0.58687
83.34	0.89191
83.43	0.94496
83.52	0.809019
83.61	0.805703
83.7	0.812334
83.79	0.752653
83.88	0.885279
83.97	0.998011
84.06	1.36273
84.15	1.48541
84.24	1.68103
84.33	1.51525
84.42	1.54178
84.51	1.73408
84.6	2.07891
84.69	2.60279
84.78	3.34881
84.87	3.35212
84.96	3.45159
85.05	3.77984
85.14	4.58554
85.23	5.27188
85.32	6.0809
85.41	6.23674
85.5	5.94828
85.59	5.52056
85.68	5.17905
85.77	4.68501
85.86	4.68501
85.95	5.20889
86.04	5.67639
86.13	7.38395
86.22	9.73143
86.31	11.8667
86.4	13.2889
86.49	13.0468
86.58	12.7981
86.67	12.6621
86.76	12.8909
86.85	11.697
86.94	10.8148
87.03	10.2975
87.12	9.08699
87.21	8.6658
87.3	8.07548
87.39	7.88645
87.48	7.56144
87.57	7.15683
87.66	7.05071
87.75	7.50174
87.84	7.95277
87.93	7.39562
88.02	7.50506
88.11	7.65098
88.2	7.08387
88.29	6.81856
88.38	7.01423
88.47	7.1701
88.56	6.83514
88.65	6.5234
88.74	7.25301
88.83	8.37064
88.92	9.45843
89.01	10.2245
89.1	11.2858
89.19	12.0651
89.28	13.1894
89.37	13.9157
89.46	14.3435
89.55	14.5359
89.64	16.3632
89.73	17.4013
89.82	17.5372
89.91	16.8607
90	15.1759
90.09	14.2374
90.18	13.9422
90.27	13.9721
90.36	14.6884
90.45	15.8558
90.54	16.9336
90.63	16.2306
90.72	14.8045
90.81	13.7366
90.9	13.7797
90.99	13.2789
91.08	12.1381
91.17	12.2111
91.26	12.4067
91.35	12.2674
91.44	12.4399
91.53	11.7998
91.62	11.1531
91.71	10.9243
91.8	10.8712
91.89	9.93268
91.98	9.26608
92.07	9.47501
92.16	10.2212
92.25	10.8182
92.34	11.4184
92.43	11.5644
92.52	12.7649
92.61	13.9522
92.7	15.1395
92.79	16.0448
92.88	16.8905
92.97	18.1143
93.06	19.1722
93.15	19.2087
93.24	18.4327
93.33	17.7196
93.42	17.6367
93.51	17.4477
93.6	17.4709
93.69	17.4842
93.78	15.7596
93.87	14.9007
93.96	15.2058
94.05	16.2173
94.14	16.6385
94.23	16.1742
94.32	16.0846
94.41	15.617
94.5	15.4678
94.59	15.7497
94.68	16.1908
94.77	16.2737
94.86	15.2124
94.95	14.3634
95.04	15.0897
95.13	15.8691
95.22	16.6584
95.31	17.2155
95.4	15.9188
95.49	14.4198
95.58	14.4165
95.67	15.6767
95.76	15.365
95.85	14.6287
95.94	13.3022
96.03	13.4481
96.12	13.6935
96.21	14.4762
96.3	15.0433
96.39	14.2208
96.48	13.8228
96.57	13.72
96.66	13.8361
96.75	14.0351
96.84	14.2573
96.93	15.0997
97.02	14.3535
97.11	12.3935
97.2	11.1465
97.29	10.7286
97.38	11.7003
97.47	11.8927
97.56	11.5644
97.65	9.92936
97.74	8.24462
97.83	6.928
97.92	7.16678
98.01	7.84002
98.1	7.29944
98.19	6.5035
98.28	5.63128
98.37	6.11879
98.46	6.71243
98.55	7.39562
98.64	7.49179
98.73	8.16503
98.82	8.89132
98.91	9.94926
99	10.3903
99.09	10.2312
99.18	10.4102
99.27	10.7319
99.36	11.299
99.45	12.4896
99.54	13.6172
99.63	14.3601
99.72	14.5093
99.81	14.7879
99.9	14.8244
99.99	14.894
100.08	14.1711
100.17	12.7317
100.26	12.6488
100.35	12.7848
100.44	13.3685
100.53	12.5958
100.62	11.2692
100.71	11.6174
100.8	12.8743
100.89	14.5127
100.98	15.292
101.07	15.8525
101.16	15.8823
101.25	15.3418
101.34	13.1629
101.43	12.0651
101.52	11.2758
101.61	10.3539
101.7	9.54466
101.79	8.79515
101.88	7.39562
101.97	6.32773
102.06	6.00272
102.15	6.88489
102.24	7.3525
102.33	7.31271
102.42	7.11372
102.51	6.97111
102.6	7.04408
102.69	6.88489
102.78	5.94302
102.87	5.60807
102.96	5.37592
103.05	5.68766
103.14	5.54837
103.23	5.38255
103.32	6.04583
103.41	6.57646
103.5	7.02418
103.59	7.41551
103.68	7.10045
103.77	6.87162
103.86	7.36908
103.95	7.91961
104.04	8.88137
104.13	9.51812
104.22	9.62093
104.31	9.56787
104.4	9.72706
104.49	9.42195
104.58	8.88469
104.67	8.49335
104.76	8.97092
104.85	9.12679
104.94	8.46019
105.03	9.14668
105.12	9.3324
105.21	9.8365
105.3	9.6541
105.39	9.70053
105.48	10.6391
105.57	10.9342
105.66	10.8845
105.75	11.6473
105.84	11.6075
105.93	12.42
106.02	12.4366
106.11	11.7965
106.2	10.271
106.29	8.52983
106.38	7.07724
106.47	7.08056
106.56	7.5946
106.65	9.0074
106.74	9.74032
106.83	9.25944
106.92	8.69234
107.01	8.39386
107.1	7.54154
107.19	6.51013
107.28	6.25808
107.37	6.45375
107.46	6.62952
107.55	6.4637
107.64	6.51676
107.73	6.9479
107.82	7.09382
107.91	6.83182
108	6.49355
108.09	7.51501
108.18	8.04563
108.27	7.81348
108.36	8.04895
108.45	8.96428
108.54	9.7768
108.63	10.0919
108.72	9.86966
108.81	9.48496
108.9	9.23291
108.99	9.4319
109.08	9.69058
109.17	10.1383
109.26	10.0952
109.35	10.2345
109.44	10.9475
109.53	10.9376
109.62	10.7551
109.71	10.5827
109.8	10.1615
109.89	8.99081
109.98	8.75203
110.07	8.68902
110.16	7.96272
110.25	7.51501
110.34	7.08719
110.43	6.85504
110.52	7.39562
110.61	7.52496
110.7	7.61782
110.79	7.62777
110.88	8.05558
110.97	8.78188
111.06	8.50662
111.15	8.20151
111.24	8.58953
111.33	10.5528
111.42	11.6307
111.51	11.6473
111.6	10.7087
111.69	10.0421
111.78	9.10689
111.87	7.71399
111.96	7.57139
112.05	7.08056
112.14	7.1701
112.23	6.59636
112.32	5.72082
112.41	5.20346
112.5	4.93152
112.59	4.69605
112.68	4.85192
112.77	4.80549
112.86	4.65625
112.95	4.78559
113.04	4.63967
113.13	4.43737
113.22	4.43405
113.31	4.19527
113.4	4.05598
113.49	4.61977
113.58	4.91493
113.67	4.706
113.76	4.25165
113.85	4.39426
113.94	4.74911
114.03	5.1902
114.12	5.64786
114.21	5.555
114.3	5.47209
114.39	4.91825
114.48	5.1902
114.57	5.68434
114.66	5.50526
114.75	4.66289
114.84	3.9996
114.93	3.56847
115.02	2.69625
115.11	0.274313
115.2	0.968668
115.29	1.3287
115.38	1.47015
115.47	1.57301
115.56	1.41443
115.65	1.39728
115.74	1.40585
115.83	1.22155
115.92	1.07582
116.01	0.994385
116.1	1.1444
116.19	1.48729
116.28	2.05306
116.37	2.46882
116.46	3.34748
116.55	3.63894
116.64	3.57893
116.73	3.12888
116.82	2.75599
116.91	2.52025
117	2.35738
117.09	2.49454
117.18	2.42596
117.27	1.77875
117.36	1.34156
117.45	1.26013
117.54	1.36299
117.63	1.59445
117.72	1.36728
117.81	1.18298
117.9	1.07582
117.99	0.994385
118.08	0.968668
118.17	0.934379
118.26	0.792936
118.35	0.754361
118.44	0.818653
118.53	0.84437
118.62	0.780078
118.71	0.707214
118.8	0.672924
118.89	0.578629
118.98	0.522909
119.07	0.424328
119.16	0.214307
119.25	0.150015
119.34	0.154301
119.43	0.0985813
119.52	0.0257169
119.61	0
119.7	0
119.79	0
119.88	0
119.97	0
120.06	0
120.15	0.0214307
120.24	0.180018
120.33	0.175732
120.42	0.0985813
120.51	0.00857229
120.6	0
120.69	0.00857229
120.78	0.102867
120.87	0.390039
120.96	0.398611
121.05	0.304316
121.14	0.334319
121.23	0.441473
121.32	0.591488
121.41	0.608632
121.5	0.715786
121.59	0.960096
121.68	1.1444
121.77	1.59016
121.86	1.92876
121.95	2.07449
122.04	2.25022
122.13	2.45596
122.22	2.86743
122.31	2.95315
122.4	2.50739
122.49	2.3831
122.58	2.17307
122.67	2.2588
122.76	2.20308
122.85	2.13021
122.94	2.18593
123.03	1.91162
123.12	1.83447
123.21	1.91162
123.3	1.7016
123.39	1.27298
123.48	0.981527
123.57	0.942951
123.66	0.690069
123.75	0.677211
123.84	0.801509
123.93	0.775792
124.02	0.758647
124.11	0.938665
124.2	0.870087
124.29	0.801509
124.38	0.810081
124.47	0.728644
124.56	0.595774
124.65	0.565771
124.74	0.668638
124.83	0.707214
124.92	0.630063
125.01	0.574343
125.1	0.54434
125.19	0.475762
125.28	0.321461
125.37	0.252882
125.46	0.197163
125.55	0.180018
125.64	0.175732
125.73	0.13287
125.82	0.0814367
125.91	0.0771506
126	0.0728644
126.09	0.0557199
126.18	0.0428614
126.27	0.0685783
126.36	0.0514337
126.45	0.0257169
126.54	0.0257169
126.63	0.00857229
126.72	0.00857229
126.81	0.00857229
126.9	0.0128584
126.99	0
127.08	0.0685783
127.17	0.16716
127.26	0.46719
127.35	0.887232
127.44	0.942951
127.53	0.887232
127.62	0.882945
127.71	1.05868
127.8	1.00296
127.89	0.475762
127.98	0.304316
128.07	0.475762
128.16	0.925807
128.25	1.05868
128.34	0.960096
128.43	1.04153
128.52	1.1144
128.61	1.43586
128.7	1.68017
128.79	1.92019
128.88	2.01877
128.97	1.94162
129.06	1.74446
129.15	1.57301
129.24	1.44872
129.33	1.26013
129.42	1.06296
129.51	0.831512
129.6	0.702927
129.69	0.741503
129.78	0.951524
129.87	1.00296
129.96	1.03296
130.05	1.07582
130.14	1.09725
130.23	1.13154
130.32	1.17869
130.41	1.2687
130.5	1.41014
130.59	1.56016
130.68	1.76589
130.77	1.80018
130.86	1.86876
130.95	2.02735
131.04	2.19451
131.13	2.45596
131.22	2.40024
131.31	2.4431
131.4	2.62312
131.49	3.08602
131.58	3.69466
131.67	4.19185
131.76	4.35472
131.85	4.68047
131.94	5.3191
132.03	5.85059
132.12	6.17205
132.21	6.25348
132.3	6.48493
132.39	6.51922
132.48	6.41636
132.57	5.91488
132.66	5.68771
132.75	6.03918
132.84	7.14071
132.93	8.25511
133.02	9.09519
133.11	10.2482
133.2	11.1354
133.29	12.3184
133.38	13.5056
133.47	14.41
133.56	15.2244
133.65	15.7516
133.74	16.686
133.83	17.5003
133.92	17.9418
134.01	16.4245
134.1	14.68
134.19	13.9857
134.28	12.4984
134.37	10.7711
134.46	9.97814
134.55	8.67515
134.64	7.77935
134.73	7.10642
134.82	6.2492
134.91	5.80344
135	5.22052
135.09	4.86906
135.18	4.44902
135.27	4.05898
135.36	3.90039
135.45	3.81467
135.54	3.8061
135.63	3.84467
135.72	3.72037
135.81	3.6818
135.9	3.47178
135.99	3.58322
136.08	3.75466
136.17	3.87467
136.26	3.82324
136.35	3.80181
136.44	3.83181
136.53	4.41044
136.62	4.49616
136.71	4.81334
136.8	5.752
136.89	6.48493
136.98	6.99927
137.07	7.66791
137.16	8.16939
137.25	7.83507
137.34	7.41503
137.43	7.03785
137.52	7.08499
137.61	7.19215
137.7	6.78496
137.79	6.4035
137.88	6.11633
137.97	5.58484
138.06	4.93764
138.15	4.34615
138.24	3.62608
138.33	3.01744
138.42	2.70456
138.51	2.51168
138.6	2.1645
138.69	1.78304
138.78	1.65445
138.87	1.71017
138.96	2.05306
139.05	2.37452
139.14	2.82028
139.23	3.16746
139.32	3.59607
139.41	4.06326
139.5	4.16613
139.59	3.67322
139.68	3.50178
139.77	3.32176
139.86	3.7118
139.95	4.39758
140.04	4.37187
140.13	3.62608
140.22	2.50739
140.31	2.20308
140.4	1.89019
140.49	1.48729
140.58	1.34585
140.67	1.47872
140.76	1.50444
140.85	1.28156
140.94	0.84437
141.03	0.690069
141.12	0.668638
141.21	0.930093
141.3	1.47443
141.39	1.86019
141.48	1.78304
141.57	1.7016
141.66	1.41871
141.75	1.31585
141.84	1.2987
141.93	1.34585
142.02	1.44443
142.11	1.2387
142.2	0.981527
142.29	0.895804
142.38	0.917235
142.47	0.780078
142.56	0.677211
142.65	0.617205
142.74	0.65578
142.83	0.741503
142.92	0.792936
143.01	0.84437
143.1	0.810081
143.19	0.780078
143.28	0.754361
143.37	0.818653
143.46	0.981527
143.55	0.84437
143.64	0.762933
143.73	0.73293
143.82	0.784364
143.91	1.00724
144	1.14869
144.09	1.19583
144.18	1.23441
144.27	1.2987
144.36	1.423
144.45	1.59873
144.54	1.95448
144.63	2.12593
144.72	2.33166
144.81	2.68313
144.9	3.45035
144.99	4.16184
145.08	4.33329
145.17	4.25185
145.26	4.66761
145.35	5.2891
145.44	5.46055
145.53	5.15623
145.62	5.51198
145.71	6.32635
145.8	7.81793
145.89	8.02795
145.98	7.72363
146.07	7.53075
146.16	8.37512
146.25	8.68373
146.34	9.37808
146.43	9.42094
146.52	9.26664
146.61	9.06948
146.7	8.14796
146.79	7.35502
146.88	7.3293
146.97	8.14367
147.06	8.56371
147.15	8.22082
147.24	6.79354
147.33	5.43912
147.42	4.81334
147.51	4.66332
147.6	4.5776
147.69	4.8262
147.78	5.3191
147.87	5.54198
147.96	6.12918
148.05	7.02499
148.14	7.82221
148.23	8.1951
148.32	8.03652
148.41	8.35369
148.5	9.65239
148.59	10.8568
148.68	11.3026
148.77	11.9798
148.86	12.6484
148.95	12.9956
149.04	13.0384
149.13	12.6827
149.22	12.1341
149.31	11.0497
149.4	9.88385
149.49	8.36226
149.58	7.68934
149.67	7.33359
149.76	7.73649
149.85	8.04938
149.94	7.80935
150.03	6.73353
150.12	6.33063
150.21	5.56341
150.3	4.80477
150.39	4.75762
150.48	5.43912
150.57	6.83211
150.66	7.71934
150.75	7.89079
150.84	7.90793
150.93	8.26368
151.02	9.42094
151.11	9.65668
151.2	10.1196
151.29	11.0025
151.38	12.7684
151.47	14.7015
151.56	15.3272
151.65	15.1601
151.74	15.2758
151.83	15.6401
151.92	16.1545
152.01	16.6602
152.1	16.7288
152.19	15.8844
152.28	15.0744
152.37	14.7272
152.46	14.3157
152.55	13.5828
152.64	13.2999
152.73	13.0556
152.82	13.7328
152.91	13.8442
153	13.5956
153.09	14.3157
153.18	15.8244
153.27	16.2273
153.36	15.2115
153.45	14.41
153.54	13.0684
153.63	11.6926
153.72	10.6854
153.81	9.47238
153.9	8.70087
153.99	7.84364
154.08	6.93498
154.17	6.4335
154.26	6.29634
154.35	5.91059
154.44	4.5776
154.53	3.29604
154.62	2.97458
154.71	3.10745
154.8	3.81038
154.89	4.74905
154.98	5.44769
155.07	6.62209
155.16	7.25215
155.25	7.44503
155.34	7.83078
155.43	8.64944
155.52	9.33951
155.61	10.4068
155.7	12.2284
155.79	12.9399
155.88	12.2241
155.97	9.93099
156.06	8.23368
156.15	7.44932
156.24	6.30492
156.33	5.10051
156.42	4.08041
156.51	3.21461
156.6	2.90172
156.69	3.0303
156.78	2.906
156.87	2.61883
156.96	2.43882
157.05	2.61455
157.14	2.19022
157.23	1.66302
157.32	1.51729
157.41	1.20869
157.5	0.891518
157.59	0.750075
157.68	0.720072
157.77	0.681497
157.86	0.694355
157.95	0.41147
158.04	0.291458
158.13	0.18859
158.22	0.0857229
158.31	0.0771506
158.4	0.0471476
158.49	0.00428614
158.58	0
158.67	0.090009
158.76	0.137157
158.85	0.201449
158.94	0.428614
159.03	0.960096
159.12	1.5473
159.21	2.46453
159.3	3.43749
159.39	3.83181
159.48	3.96468
159.57	3.94325
159.66	3.49749
159.75	3.21032
159.84	3.07316
159.93	3.30462
160.02	3.33891
160.11	3.18032
160.2	2.96601
160.29	2.5974
160.38	2.23737
160.47	1.91591
160.56	1.73589
160.65	1.74446
160.74	1.7016
160.83	1.70589
160.92	1.7016
161.01	1.56873
161.1	1.51729
161.19	1.57301
161.28	1.68017
161.37	1.83876
161.46	2.21165
161.55	2.38738
161.64	2.14736
161.73	2.13879
161.82	2.45167
161.91	2.77742
162	3.21461
162.09	3.56607
162.18	4.0204
162.27	4.9805
162.36	6.49779
162.45	7.65505
162.54	8.71802
162.63	10.0853
162.72	11.3154
162.81	12.2412
162.9	12.8584
162.99	13.3256
163.08	14.5943
163.17	16.2231
163.26	17.7403
163.35	18.6276
163.44	19.0948
163.53	20.9421
163.62	21.4521
163.71	21.0192
163.8	19.4119
163.89	18.0661
163.98	17.6075
164.07	16.8488
164.16	16.9988
164.25	16.0602
164.34	14.9201
164.43	13.8828
164.52	14.3543
164.61	14.4314
164.7	14.1828
164.79	13.6385
164.88	14.0694
164.97	14.1571
165.06	14.5087
165.15	14.3886
165.24	13.2396
165.33	12.9009
165.42	12.6222
165.51	12.2578
165.6	11.9062
165.69	11.7647
165.78	11.8376
165.87	11.8633
165.96	11.799
166.05	12.5236
166.14	12.3392
166.23	12.2063
166.32	12.4464
166.41	11.859
166.5	11.2588
166.59	10.9029
166.68	9.55668
166.77	8.76351
166.86	7.73881
166.95	6.77843
167.04	6.69696
167.13	6.73126
167.22	6.37969
167.31	6.01526
167.4	5.82233
167.49	6.09672
167.58	6.787
167.67	7.46441
167.76	6.90276
167.85	6.25965
167.94	6.66266
168.03	7.38295
168.12	8.03036
168.21	8.99931
168.3	10.6157
168.39	11.5975
168.48	11.9962
168.57	12.8623
168.66	13.2096
168.75	14.4143
168.84	16.3565
168.93	16.9825
169.02	17.0725
169.11	17.5785
169.2	16.8968
169.29	16.6266
169.38	17.4455
169.47	18.9461
169.56	19.4306
169.65	19.5678
169.74	18.5346
169.83	17.9086
169.92	17.6856
170.01	18.3802
170.1	18.9976
170.19	19.1091
170.28	18.5517
170.37	17.2655
170.46	15.7349
170.55	14.6587
170.64	13.7155
170.73	13.2696
170.82	13.5654
170.91	14.0585
171	14.7616
171.09	15.7692
171.18	16.5452
171.27	17.5742
171.36	18.2473
171.45	18.3974
171.54	18.2516
171.63	18.6632
171.72	19.2806
171.81	19.1262
171.9	18.153
171.99	16.841
172.08	15.9964
172.17	15.722
172.26	16.5195
172.35	17.9129
172.44	19.555
172.53	18.7875
172.62	16.9096
172.71	16.691
172.8	17.1197
172.89	16.7467
172.98	16.1293
173.07	16.0864
173.16	14.7145
173.25	14.1014
173.34	14.7402
173.43	14.5687
173.52	13.7669
173.61	13.2482
173.7	13.3168
173.79	12.8194
173.88	13.5869
173.97	14.5601
174.06	15.096
174.15	15.0875
174.24	15.4176
174.33	15.3318
174.42	15.0746
174.51	15.4648
174.6	15.8078
174.69	16.1079
174.78	16.095
174.87	16.3051
174.96	17.3126
175.05	16.8667
175.14	16.1636
175.23	15.5634
175.32	15.0274
175.41	14.6844
175.5	14.6244
175.59	14.9674
175.68	15.5162
175.77	14.9674
175.86	14.9503
175.95	15.4133
176.04	16.3094
176.13	17.4327
176.22	18.3502
176.31	18.8304
176.4	20.0266
176.49	21.7458
176.58	22.0717
176.67	23.1736
176.76	23.4394
176.85	23.4737
176.94	22.9806
177.03	21.4243
177.12	19.3749
177.21	17.6342
177.3	16.3608
177.39	14.9674
177.48	14.1571
177.57	13.8613
177.66	12.7122
177.75	12.8923
177.84	13.484
177.93	14.1742
178.02	14.3543
178.11	14.7916
178.2	16.0864
178.29	16.2065
178.38	16.3265
178.47	15.7992
178.56	13.857
178.65	11.4346
178.74	9.9597
178.83	9.13651
178.92	8.98216
179.01	8.75064
179.1	9.18367
179.19	10.1912
179.28	11.1216
179.37	11.9319
179.46	12.1806
179.55	13.3896
179.64	14.8902
179.73	15.4776
179.82	15.8849
[truncated: 393 more rows]
