# Supplementary material for: Living on the edge: environmental variability of a shallow late Holocene cold-water coral mound
Source: Coral Reefs. 2022 Apr 12;41(4):1255–71. doi: 10.1007/s00338-022-02249-4 (PMC9325858; doi:10.1007/s00338-022-02249-4)
Supplement: Supplementary file 4 — Supplementary file4 (XLSX 15 kb) [file 338_2022_2249_MOESM4_ESM.xlsx]

## Sheet: Tabelle1
				Table S1: Coral fragments of Desmophyllum pertusum sediment core 576-1 dated by 230Th/U. For details please see text.
Core depth	Age BP	±	min-Age	max-Age	U238	±	Th232	±	Th230	±	Th230/Th232	±	U238/Th232	±	Th230/U238	±	Th230exc./U238	±	U234/U238	±	U234/U238initial	±
cmbsf	ka	ka	ka	ka	ppm		ppb		ppt		dpm/dpm		dpm/dpm		dpm/dpm		dpm/dpm		dpm/dpm		dpm/dpm
17	1.50143	0.0191308	1.4823	1.52056	4.84322	0.0229504	0.878013	0.00457978	1.25695	0.00848531	268.621	2.35738	16922.3	124.101	0.0158738	0.000131046	0.015822	0.000130906	1.14061	0.00463743	1.1412	0.00464749
24	1.44167	0.0168728	1.4248	1.45855	5.30503	0.0222252	5.9699	0.030247	1.35435	0.00789566	42.5685	0.340265	2726.13	18.757	0.015615	0.000112237	0.0152936	0.000111476	1.15015	0.00299972	1.15076	0.00300851
73.5	1.93992	0.0216771	1.91825	1.9616	5.2897	0.025781	1.39573	0.00712841	1.76145	0.00981056	236.806	1.85468	11626.7	85.4042	0.0203675	0.000150912	0.0202921	0.000150672	1.13815	0.00433293	1.13891	0.00434433
86	2.4127	0.021538	2.39117	2.43424	4.46273	0.0182615	5.90109	0.0298978	1.86798	0.009768	59.3969	0.449419	2320.03	15.826	0.0256017	0.000170237	0.025224	0.000169306	1.14423	0.0023922	1.14522	0.00240311
89	2.37179	0.0255012	2.34629	2.39729	3.89102	0.0177028	1.39432	0.0070855	1.58621	0.00993235	213.462	1.77659	8561.03	60.9226	0.0249341	0.000193194	0.0248318	0.000192922	1.1437	0.003939	1.14467	0.00395276
89	2.4073	0.0265141	2.38079	2.43382	3.8014	0.0163329	0.607279	0.00327467	1.5767	0.00921764	487.175	4.0023	19203.6	138.021	0.025369	0.000184277	0.0253234	0.000184161	1.14907	0.00529859	1.15009	0.00531453
111	2.32149	0.0207485	2.30074	2.34224	4.04483	0.0168698	0.896943	0.00454012	1.61922	0.00957215	338.738	2.72689	13834.4	94.9802	0.0244851	0.000177357	0.0244218	0.000177205	1.14844	0.00306021	1.14942	0.00307158
152	2.44424	0.026314	2.41793	2.47056	3.84692	0.0173934	0.830222	0.00428532	1.61259	0.0102461	364.462	3.07643	14214.9	101.718	0.0256394	0.000200152	0.0255777	0.000199991	1.14353	0.00405476	1.14452	0.00406903
152	2.67949	0.0263534	2.65314	2.70585	3.91902	0.01784	0.749558	0.00387943	1.79501	0.00967878	449.351	3.48349	16039.8	115.25	0.0280148	0.000197941	0.0279602	0.000197781	1.14229	0.00357982	1.14337	0.00359389
162	2.80895	0.0237454	2.78521	2.8327	3.70793	0.0154234	0.573115	0.00291698	1.78564	0.0104322	584.623	4.68697	19848	136.541	0.0294551	0.000211503	0.0294109	0.000211397	1.14717	0.0029412	1.14834	0.00295416
178.5	2.81631	0.0277289	2.78859	2.84405	3.263	0.0142963	0.194617	0.00105335	1.566	0.00876058	1509.86	12.1566	51435.5	373.073	0.0293543	0.000208844	0.0293373	0.000208798	1.14123	0.00369986	1.14236	0.00371468
178.5	2.83302	0.0299487	2.80308	2.86298	4.12647	0.0193793	3.34115	0.0170421	2.0051	0.01107	112.607	0.877562	3788.86	27.372	0.0297204	0.000215677	0.0294892	0.00021498	1.1417	0.00463376	1.14284	0.00465047
193	2.89208	0.024516	2.86757	2.9166	4.45586	0.0185068	3.39378	0.0172118	2.22094	0.0127946	122.794	0.975767	4027.86	27.64	0.0304861	0.000216782	0.0302685	0.000216259	1.14829	0.00280365	1.14951	0.00281698
207	3.18352	0.0251762	3.15835	3.2087	4.21347	0.017261	0.783484	0.00405384	2.29216	0.0125348	548.957	4.28443	16498.2	113.912	0.0332738	0.000227661	0.0332207	0.000227531	1.14625	0.00263121	1.14757	0.00264474
211	4.13231	0.0420345	4.09028	4.17435	3.71346	0.0176357	0.41366	0.00217573	2.58108	0.0153197	1170.8	9.59267	27539.8	203.007	0.0425129	0.000323514	0.0424811	0.00032342	1.13561	0.00428087	1.13721	0.00430318
