# Supplementary material for: Living on the edge: environmental variability of a shallow late Holocene cold-water coral mound
Source: Coral Reefs. 2022 Apr 12;41(4):1255–71. doi: 10.1007/s00338-022-02249-4 (PMC9325858; doi:10.1007/s00338-022-02249-4)
Supplement: Supplementary file 5 — Supplementary file5 (XLSX 12 kb) [file 338_2022_2249_MOESM5_ESM.xlsx]

## Sheet: Tabelle1
Elemental ratios and stbale oxygen isotopes of Lobatula lobatula from sediment core 576-1. For details please see text.
Core	Mg 279/	Al 167/	Fe238/	d18O corr.
Depth	Ca 370	Ca370	Ca370	Calcite ‰ VPDB	2 S.D.
cm	mmol/mol	mmol/mol	mmol/mol		±‰
0	2.71625	0.0687225	0.898594	1.06	0.071
3	2.90616	0.721063	1.64129	0.445	0.071
6	2.63421	0.175595	3.69068	-0.169	0.071
12	2.95126	0.112835	3.63506	-0.181	0.071
15	3.1104	0.246149	3.26941	0.151	0.071
18	3.23531	0.672945	5.84778	0.364	0.071
21	2.91724	0.0863612	2.81463	0.024	0.071
27	2.59004	0.0521564	1.17212	0.956	0.071
30	2.82964	0.715379	0.1	0.81	0.071
33	3.075	0.627628	4.57554	0.259	0.071
36	2.8959	0.0357552	0.599571	0.19	0.063
39	2.63158	0.198558	4.33287	0.932	0.063
42	2.67096	0.462138	3.44701	0.443	0.063
45	2.47161	0.0519347	7.76163	0.892	0.063
48	2.7307	0.137183	10.1746	0.264	0.063
51	2.87765	0.115873	7.05861	0.094	0.063
54	2.70349	0.250568	0.692088	0.287	0.063
60	2.59787	0.0450439	2.05133	0.975	0.063
66	2.42414	0.111663	6.23848	0.015	0.063
69	2.44879	0.0732007	4.13818	1.072	0.063
72	3.09662	0.733966	10.3465	0.086	0.063
75	2.72383	0.498855	9.66111	0.181	0.063
78	2.47388	0.0541415	1.04991	0.006	0.063
81	2.89871	0.368126	5.36442	0.417	0.028
84	2.97741	0.812239	4.04347	1.031	0.063
87	2.64023	0.280947	3.84719	0.638	0.028
90	2.71692	0.0661418	2.45244	0.611	0.063
93	2.54133	0.198196	4.17279	0.174	0.063
96	2.67285	0.0684727	2.66853	-0.06	0.063
99	2.59602	0.0757102	1.72032	-0.094	0.063
102	2.35376	0.298597	7.58396	0.36	0.063
105	2.58623	0.460586	1.86459	1.185	0.028
108	2.9026	0.839957	8.39494	0.17	0.063
111	2.65332	0.0871532	4.03078	0.317	0.028
114	2.63501	0.276576	6.74458	0.928	0.063
117	2.37901	0.211566	4.77545	-0.041	0.063
120	2.87383	0.427982	5.9927	1.593	0.063
123	2.39858	0.175351	2.50022	-0.289	0.063
126	2.9299	0.77675	9.50789	0.727	0.063
129	2.39907	0.116057	5.9096	0.242	0.063
132	2.86942	0.644676	6.87625	0.189	0.063
135	3.26403	0.640533	5.27208	-0.09	0.063
138	2.4179	0.120006	2.19796	0.127	0.063
141	2.55172	0.188371	5.63744	-0.331	0.063
144	2.82535	0.0778934	3.25538	0.817	0.063
147	2.3472	0.177532	5.95008	-0.044	0.028
150	2.64505	0.20906	1.96308	0.053	0.061
153	2.79925	0.0946247	1.10406	0.02	0.061
156	2.78942	0.394672	4.44783	0.683	0.061
159	2.60528	0.0506667	2.52057	0.87	0.061
162	2.56817	0.114316	3.80986	0.095	0.061
165	2.40006	0.122615	3.90166	1.382	0.061
168	2.72155	0.0744112	4.20308	-0.161	0.061
171	2.57474	0.0542947	5.67166	0.809	0.061
174	2.35097	0.120445	3.5023	0.938	0.061
177	2.98386	0.674708	5.11408	0.972	0.061
180	2.77678	0.134115	1.66186	-0.004	0.061
183	2.79067	0.241586	4.38529	0.167	0.061
186	2.54013	0.0823493	1.32763	-0.059	0.061
189	2.78752	0.583476	4.54917	0.765	0.061
192	2.42083	0.158281	2.16525	-0.021	0.061
195	2.73468	0.154253	2.97912	0.497	0.061
198	2.80942	0.0826966	0.745128	0.468	0.061
201	2.72996	0.259722	3.52046	0.013	0.061
204	2.62	0.154174	1.91286	0.519	0.061
207	2.72244	0.141654	4.02547	0.341	0.061
210	2.44936	0.144595	3.87023	1.42	0.061
213	2.85213	0.0714646	1.58553	0.896	0.061
