# Supplementary material for: Living on the edge: environmental variability of a shallow late Holocene cold-water coral mound
Source: Coral Reefs. 2022 Apr 12;41(4):1255–71. doi: 10.1007/s00338-022-02249-4 (PMC9325858; doi:10.1007/s00338-022-02249-4)
Supplement: Supplementary file 6 — Supplementary file6 (XLSX 29 kb) [file 338_2022_2249_MOESM6_ESM.xlsx]

## Sheet: Tabelle1
Gear	Station #	Area	Lat (°N)	Long (°E)	Waterdepth	Temperature	Salinity	d18OSW	density	d18OC*
					m	°C	g/kg	‰	kg/m3	‰
CTD Seabird ‘SBE 9 plus’ underwater unit	P325-420	Stjernsund 270m - east flank	70.2667	22.4851	247	5.821	34.918	0.2215	27.5134	2.1776
CTD Seabird ‘SBE 9 plus’ underwater unit	P325-420	Stjernsund 270m - east flank	70.2667	22.4851	247	5.821	34.918	0.1825	27.5134	2.1386
CTD Seabird ‘SBE 9 plus’ underwater unit	P325-421	Stjernsund 200m - top of ridge	70.2683	22.4743	213	5.884	34.943	0.097	27.522	2.03898
CTD Seabird ‘SBE 9 plus’ underwater unit	P325-421	Stjernsund 200m - top of ridge	70.2683	22.4743	203	5.783	34.885	0.196	27.4907	2.16061
CTD Seabird ‘SBE 9 plus’ underwater unit	P325-422	Stjernsund 300m - western flank	70.2697	22.4691	300	5.987	35.085	0.2485	27.6242	2.16741
CTD Seabird ‘SBE 9 plus’ underwater unit	P325-422	Stjernsund 300m - western flank	70.2697	22.4691	289	5.984	35.072	0.3505	27.6179	2.27008
CTD Seabird ‘SBE 9 plus’ underwater unit	P325-373	Røst Reef	67.5252	9.49003	310	7.071	35.245	0.2665	27.6061	1.9426
CTD Seabird ‘SBE 9 plus’ underwater unit	P325-373	Røst Reef	67.5252	9.49003	298	7.064	35.245	0.294	27.6068	1.97166
CTD Seabird ‘SBE 9 plus’ underwater unit	P325-374	Røst Reef	67.5267	9.49332	315	7.073	35.245	0.28275	27.606	1.9584
CTD Seabird ‘SBE 9 plus’ underwater unit	P325-374	Røst Reef	67.5267	9.49332	304	7.069	35.245	0.235	27.6059	1.91154
CTD Seabird ‘SBE 9 plus’ underwater unit	P325-375	Røst Reef	67.5277	9.49708	304	7.084	35.246	0.2495	27.605	1.92268
CTD Seabird ‘SBE 9 plus’ underwater unit	P325-375	Røst Reef	67.5277	9.49708	292	7.099	35.248	0.214	27.604	1.88382
CTD Seabird ‘SBE 9 plus’ underwater unit	P325-376-1	Røst Reef	67.5292	9.50258	319	7.09	35.247	0.237	27.606	1.90884
CTD Seabird ‘SBE 9 plus’ underwater unit	P325-376-2	Røst Reef	67.5296	9.50348	318	7.07	35.245	0.265	27.606	1.94132
CTD Seabird ‘SBE 9 plus’ underwater unit	P325-376-2	Røst Reef	67.5296	9.50348	307	7.07	35.245	0.2425	27.6058	1.91882
CTD Seabird ‘SBE 9 plus’ underwater unit	P325-377	Røst Reef	67.5302	9.50515	331	7.059	35.244	0.2235	27.6067	1.90228
CTD Seabird ‘SBE 9 plus’ underwater unit	P325-377	Røst Reef	67.5302	9.50515	320	7.065	35.244	0.271	27.6068	1.94844
CTD Seabird ‘SBE 9 plus’ underwater unit	P325-378-1	Røst Reef	67.5264	9.50663	265	7.102	35.248	0.2145	27.6034	1.88365
CTD Seabird ‘SBE 9 plus’ underwater unit	P325-378-1	Røst Reef	67.5264	9.50663	254	7.104	35.248	0.2515	27.6031	1.9202
CTD Seabird ‘SBE 9 plus’ underwater unit	P325-379	Røst Reef	67.5276	9.5027	305	7.037	35.242	0.2985	27.608	1.98221
CTD Seabird ‘SBE 9 plus’ underwater unit	P325-379	Røst Reef	67.5276	9.5027	294	7.038	35.243	0.2895	27.6084	1.97299
CTD Seabird ‘SBE 9 plus’ underwater unit	P325-380	Røst Reef	67.5295	9.4967	322	6.997	35.239	0.288	27.6121	1.98067
CTD Seabird ‘SBE 9 plus’ underwater unit	P325-380	Røst Reef	67.5295	9.4967	311	6.993	35.239	0.2845	27.6121	1.97807
CTD Seabird ‘SBE 9 plus’ underwater unit	P325-381	Røst Reef	67.5314	9.49128	336	6.97	35.237	0.324	27.6156	2.02272
CTD Seabird ‘SBE 9 plus’ underwater unit	P325-381	Røst Reef	67.5314	9.49128	324	6.972	35.238	0.312	27.6144	2.01027
CTD Seabird ‘SBE 9 plus’ underwater unit	P325-338	Trænadjupet Reefs	66.8917	11.1245	375	7.156	35.246	0.2035	27.596	1.86056
CTD Seabird ‘SBE 9 plus’ underwater unit	P325-338	Trænadjupet Reefs	66.8917	11.1245	364	7.154	35.246	0.17	27.5959	1.8275
CTD Seabird ‘SBE 9 plus’ underwater unit	P325-354	Trænadjupet Reefs	66.9692	11.1212	315	7.242	35.239	0.2875	27.5767	1.92529
CTD Seabird ‘SBE 9 plus’ underwater unit	P325-354	Trænadjupet Reefs	66.9692	11.1212	304	7.24	35.238	0.29	27.5768	1.92824
CTD Seabird ‘SBE 9 plus’ underwater unit	P325-360	Trænadjupet Reefs	66.9731	11.109	297	7.244	35.241	0.2665	27.5783	1.90384
CTD Seabird ‘SBE 9 plus’ underwater unit	P325-360	Trænadjupet Reefs	66.9731	11.109	286	7.243	35.241	0.295	27.5779	1.93257
CTD Seabird ‘SBE 9 plus’ underwater unit	ARK XXII/1a-40-1	Sotbakken	70.7118	18.6547	370	6.35	35.16	0.267	27.63	2.1046
CTD Seabird ‘SBE 9 plus’ underwater unit	ARK XXII/1a-40-1	Sotbakken	70.7118	18.6547	370	6.35	35.16	0.209	27.63	2.0466
CTD Seabird ‘SBE 9 plus’ underwater unit	P325-396	Fugløyrinne	70.1291	18.1329	383	7.219	35.2	0.2495	27.5506	1.89244
CTD Seabird ‘SBE 9 plus’ underwater unit	P325-396	Fugløyrinne	70.1291	18.1329	371	7.222	35.199	0.284	27.55	1.92627
CTD Seabird ‘SBE 9 plus’ underwater unit	P325-383	Sveinsgrunnen	69.7168	16.1246	1039	-0.623	34.91	0.2115	28.066	3.61105
CTD Seabird ‘SBE 9 plus’ underwater unit	P325-383	Sveinsgrunnen	69.7168	16.1246	593	4.1	35.081	0.229	27.846	2.5706
CTD Seabird ‘SBE 9 plus’ underwater unit	P325-383	Sveinsgrunnen	69.7168	16.1246	298	6.445	35.202	0.3315	27.6575	2.14782
CTD Seabird ‘SBE 9 plus’ underwater unit	P325-386	Sveinsgrunnen	69.7076	16.2337	188	7.143	34.954	0.2035	27.3447	1.86347
CTD Seabird ‘SBE 9 plus’ underwater unit	P325-386	Sveinsgrunnen	69.7076	16.2337	175	7.45	34.841	0.1735	27.2286	1.7647
CTD Seabird ‘SBE 9 plus’ underwater unit	P325-386	Sveinsgrunnen	69.7076	16.2337	50	7.004	34.088	-0.025	26.6867	1.6661
CTD Seabird ‘SBE 9 plus’ underwater unit	P325-386	Sveinsgrunnen	69.7076	16.2337	10	11.254	33.61	-0.179	25.6436	0.560104
SAIV micro-CTD attached to bottom trawl net	3	CEND 10/04	53.9403	1.29057	3	14.53	34.7644	0.263501	25.904	0.268781
SAIV micro-CTD attached to bottom trawl net	12	CEND 10/04	51.6211	2.80325	3	18.63	34.7297	0.306457	24.924	-0.606663
SAIV micro-CTD attached to bottom trawl net	23	CEND 10/04	52.5592	4.20038	3	19.14	33.0598	-0.362582	23.532	-1.38994
SAIV micro-CTD attached to bottom trawl net	21	CEND 10/04	52.8071	2.73177	3	16.57	34.1518	0.0709357	24.977	-0.380744
SAIV micro-CTD attached to bottom trawl net	31	CEND 10/04	53.7464	5.30173	3	19.18	33.31	-0.110767	23.71	-1.14709
SAIV micro-CTD attached to bottom trawl net	33	CEND 10/04	53.7836	3.50445	3	18.12	34.5405	0.144999	24.919	-0.653881
SAIV micro-CTD attached to bottom trawl net	41	CEND 10/04	54.5097	2.69748	3	18.16	34.98	0.28967	25.233	-0.51817
SAIV micro-CTD attached to bottom trawl net	44	CEND 10/04	55.7148	2.78053	3	17.85	35.0265	0.321986	25.348	-0.416414
SAIV micro-CTD attached to bottom trawl net	54	CEND 10/04	54.9254	7.02711	3	19.72	32.7911	-0.306788	23.202	-1.46407
SAIV micro-CTD attached to bottom trawl net	51	CEND 10/04	54.7626	4.8546	3	18.56	34.6217	0.145987	24.863	-0.751453
SAIV micro-CTD attached to bottom trawl net	64	CEND 10/04	55.6068	7.19418	3	20.23	33.1837	-0.207049	23.312	-1.47857
SAIV micro-CTD attached to bottom trawl net	62	CEND 10/04	55.7626	5.245	3	18.5	34.865	0.167712	25.063	-0.716288
SAIV micro-CTD attached to bottom trawl net	90	CEND 10/04	58.4633	3.92875	3	18.67	32.6207	-0.436646	23.316	-1.35873
SAIV micro-CTD attached to bottom trawl net	89	CEND 10/04	58.1043	4.75832	3	18.29	33.178	-0.420352	23.822	-1.25731
SAIV micro-CTD attached to bottom trawl net	108	CEND 10/04	56.735	3.60707	3	18.04	34.6635	0.179284	25.032	-0.601676
SAIV micro-CTD attached to bottom trawl net	116	CEND 10/04	57.1352	1.5233	3	17.34	35.218	0.272388	25.64	-0.351772
SAIV micro-CTD attached to bottom trawl net	128	CEND 10/04	57.1592	-1.79052	3	14.15	34.8552	0.318913	26.047	0.409313
SAIV micro-CTD attached to bottom trawl net	127	CEND 10/04	57.7002	-0.24945	3	16.66	35.1984	0.422599	25.769	-0.0492413
SAIV micro-CTD attached to bottom trawl net	143	CEND 10/04	54.8133	1.26038	3	17.53	34.7553	0.322369	25.22	-0.344351
SAIV micro-CTD attached to bottom trawl net	136	CEND 10/04	55.8372	1.17925	3	17.84	35.1459	0.356437	25.442	-0.379723
SAIV micro-CTD attached to bottom trawl net	151	CEND 10/04	54.8941	-0.280317	3	16.81	34.6576	0.283364	25.345	-0.222076
SAIV micro-CTD attached to bottom trawl net	158	CEND 10/04	55.5847	0.804017	3	16.63	34.8817	0.215721	25.552	-0.249399
SAIV micro-CTD attached to bottom trawl net	170	CEND 10/04	58.4142	-2.56918	3	13.42	35.199	0.412724	26.435	0.666644
SAIV micro-CTD attached to bottom trawl net	168	CEND 10/04	58.2322	-0.50185	3	14.81	35.4066	0.383593	26.376	0.326153
SAIV micro-CTD attached to bottom trawl net	172	CEND 10/04	59.9942	-0.648733	3	14.56	35.3212	0.3594	26.336	0.35796
SAIV micro-CTD attached to bottom trawl net	177	CEND 10/04	61.3191	0.551967	3	13.72	35.2357	0.300645	26.482	0.487365
SAIV micro-CTD attached to bottom trawl net	175	CEND 10/04	61.4972	-1.20012	3	13.35	35.4565	0.470985	26.746	0.740585
SAIV micro-CTD attached to bottom trawl net	185	CEND 10/04	61.4405	2.70443	3	14.71	34.1419	-4.34467e-05	25.403	-0.0350834
SAIV micro-CTD attached to bottom trawl net	186	CEND 10/04	60.2011	3.1194	3	14.8	34.2	0.0626616	25.412	0.00746163
SAIV micro-CTD attached to bottom trawl net	194	CEND 10/04	60.3498	1.21278	3	14.97	34.32	0.0102037	25.47	-0.0830763
SAIV micro-CTD attached to bottom trawl net	196	CEND 10/04	59.2454	0.8771	3	14.76	35.03	0.221646	26.06	0.175406
SAIV micro-CTD attached to bottom trawl net	205	CEND 10/04	59.2149	3.3823	3	14.91	33.68	-0.20853	24.977	-0.28837
SAIV micro-CTD attached to bottom trawl net	219	CEND 10/04	58.2345	1.4556	3	14.09	35.3168	0.383593	26.423	0.487433
ESM2 mini CTD/Niskin bottle deployments	7	CEND 13/05	51.8515	3.69883	3	18.05	32.9933	-0.281992	23.69	-1.06519
ESM2 mini CTD/Niskin bottle deployments	4	CEND 13/05	51.5942	2.77967	3	18.02	34.253	0.1607	24.707	-0.61578
ESM2 mini CTD/Niskin bottle deployments	2	CEND 13/05	51.7807	1.7805	3	17.48	34.76	0.183403	25.234	-0.472117
ESM2 mini CTD/Niskin bottle deployments	7	CEND 13/05	51.8515	3.69883	23	18.04	33.0316	-0.148253	23.84	-0.929213
ESM2 mini CTD/Niskin bottle deployments	2	CEND 13/05	51.7807	1.7805	27	17.53	34.8	0.280154	25.344	-0.386566
ESM2 mini CTD/Niskin bottle deployments	4	CEND 13/05	51.5942	2.77967	32	17.93	34.344	0.212498	24.91	-0.543822
ESM2 mini CTD/Niskin bottle deployments	8	CEND 13/05	52.5412	4.19117	3	17.26	33.7163	0.0397815	24.469	-0.566458
ESM2 mini CTD/Niskin bottle deployments	10	CEND 13/05	52.7293	3.412	3	17.26	33.7163	0.273228	24.469	-0.333012
ESM2 mini CTD/Niskin bottle deployments	13	CEND 13/05	52.842	2.77633	3	16.08	34.4014	0.122203	25.29	-0.219717
ESM2 mini CTD/Niskin bottle deployments	8	CEND 13/05	52.5412	4.19117	23	17.26	33.9395	-0.00414395	24.744	-0.610384
ESM2 mini CTD/Niskin bottle deployments	10	CEND 13/05	52.7293	3.412	31	17.26	33.9395	0.257435	24.744	-0.348805
ESM2 mini CTD/Niskin bottle deployments	13	CEND 13/05	52.842	2.77633	36	16	34.4036	0.0772909	25.441	-0.246709
ESM2 mini CTD/Niskin bottle deployments	21	CEND 13/05	53.75	5.309	3	15.9	34.4814	0.0887159	25.387	-0.212884
ESM2 mini CTD/Niskin bottle deployments	16	CEND 13/05	53.8328	3.404	3	15.21	34.9789	0.224861	25.928	0.0778206
ESM2 mini CTD/Niskin bottle deployments	18	CEND 13/05	53.787	4.47217	3	16.54	35.0633	0.206144	25.679	-0.238816
ESM2 mini CTD/Niskin bottle deployments	14	CEND 13/05	53.8582	2.54583	3	15.19	35.1693	0.287016	26.075	0.144456
ESM2 mini CTD/Niskin bottle deployments	21	CEND 13/05	53.75	5.309	31	15.81	34.4783	0.0624845	25.554	-0.218955
ESM2 mini CTD/Niskin bottle deployments	16	CEND 13/05	53.8328	3.404	39	15.01	34.9979	0.270267	26.139	0.168027
ESM2 mini CTD/Niskin bottle deployments	18	CEND 13/05	53.787	4.47217	41	16.5	35.0945	0.111193	25.815	-0.324807
ESM2 mini CTD/Niskin bottle deployments	14	CEND 13/05	53.8582	2.54583	50	15.03	35.1764	0.290471	26.301	0.183751
ESM2 mini CTD/Niskin bottle deployments	22	CEND 13/05	54.9438	7.1195	3	15.45	33.063	-0.212029	24.392	-0.412829
ESM2 mini CTD/Niskin bottle deployments	24	CEND 13/05	54.5973	6.42133	3	16.09	33.828	0.055454	24.837	-0.288706
ESM2 mini CTD/Niskin bottle deployments	26	CEND 13/05	54.6438	5.61083	3	15.01	34.579	0.166997	25.655	0.0647571
ESM2 mini CTD/Niskin bottle deployments	22	CEND 13/05	54.9438	7.1195	32	15.48	33.1602	-0.162203	24.573	-0.369723
ESM2 mini CTD/Niskin bottle deployments	24	CEND 13/05	54.5973	6.42133	38	16.09	33.8327	0.00770112	24.997	-0.336459
ESM2 mini CTD/Niskin bottle deployments	26	CEND 13/05	54.6438	5.61083	44	13.67	34.6287	0.233133	26.156	0.431053
ESM2 mini CTD/Niskin bottle deployments	35	CEND 13/05	54.776	1.29767	3	14.68	34.7862	0.22144	25.887	0.19312
ESM2 mini CTD/Niskin bottle deployments	28	CEND 13/05	54.7763	4.95917	3	14.79	34.8256	0.192168	25.9	0.139208
ESM2 mini CTD/Niskin bottle deployments	32	CEND 13/05	54.4965	2.708	3	15.45	34.9778	0.280514	25.871	0.0797145
ESM2 mini CTD/Niskin bottle deployments	30	CEND 13/05	54.5585	3.37883	3	14.96	35.0158	0.252382	26.002	0.161342
ESM2 mini CTD/Niskin bottle deployments	32	CEND 13/05	54.4965	2.708	27	15.43	34.9785	0.297789	25.987	0.101469
ESM2 mini CTD/Niskin bottle deployments	35	CEND 13/05	54.776	1.29767	35	13.6	34.7436	0.191629	26.217	0.405229
ESM2 mini CTD/Niskin bottle deployments	30	CEND 13/05	54.5585	3.37883	39	13.3	34.9955	0.260426	26.49	0.541226
ESM2 mini CTD/Niskin bottle deployments	28	CEND 13/05	54.7763	4.95917	44	10.64	34.771	0.192662	26.838	1.0693
ESM2 mini CTD/Niskin bottle deployments	38	CEND 13/05	54.8743	-0.264	3	15.16	34.6122	0.165968	25.66	0.0301284
ESM2 mini CTD/Niskin bottle deployments	40	CEND 13/05	55.5673	-0.808	3	15.13	34.6908	0.258915	25.72	0.129795
ESM2 mini CTD/Niskin bottle deployments	37	CEND 13/05	54.8032	0.203833	3	14.85	34.95	0.244485	25.982	0.178085
ESM2 mini CTD/Niskin bottle deployments	42	CEND 13/05	55.8483	0.0343333	3	15.01	34.8622	0.200018	25.882	0.0977777
ESM2 mini CTD/Niskin bottle deployments	38	CEND 13/05	54.8743	-0.264	71	8.31	34.6489	0.259409	27.258	1.65797
ESM2 mini CTD/Niskin bottle deployments	37	CEND 13/05	54.8032	0.203833	77	7.82	34.7451	0.263851	27.643	1.77217
ESM2 mini CTD/Niskin bottle deployments	42	CEND 13/05	55.8483	0.0343333	83	8.1	34.8549	0.335917	27.465	1.78152
ESM2 mini CTD/Niskin bottle deployments	40	CEND 13/05	55.5673	-0.808	97	7.73	34.7345	0.262747	27.542	1.79123
ESM2 mini CTD/Niskin bottle deployments	44	CEND 13/05	55.8487	1.13317	3	14.58	34.9522	0.316181	26.034	0.310261
ESM2 mini CTD/Niskin bottle deployments	46	CEND 13/05	55.736	2.71733	3	14.55	35.0087	0.343311	26.101	0.344111
ESM2 mini CTD/Niskin bottle deployments	49	CEND 13/05	55.5505	3.75733	3	14.59	35.0245	0.264866	26.091	0.256706
ESM2 mini CTD/Niskin bottle deployments	49	CEND 13/05	55.5505	3.75733	35	10.61	35.0264	0.334437	27.013	1.2178
ESM2 mini CTD/Niskin bottle deployments	44	CEND 13/05	55.8487	1.13317	77	7.64	34.8878	0.345282	27.578	1.89392
ESM2 mini CTD/Niskin bottle deployments	46	CEND 13/05	55.736	2.71733	78	7.89	34.9441	0.289977	27.585	1.78262
ESM2 mini CTD/Niskin bottle deployments	57	CEND 13/05	55.6355	7.16267	3	15.6	32.85	-0.275083	24.198	-0.509483
ESM2 mini CTD/Niskin bottle deployments	54	CEND 13/05	55.694	6.7155	3	15.62	33.584	-0.0563421	24.762	-0.295222
ESM2 mini CTD/Niskin bottle deployments	52	CEND 13/05	55.7445	5.24233	3	15.4	34.476	0.124739	25.498	-0.0648615
ESM2 mini CTD/Niskin bottle deployments	50	CEND 13/05	55.5362	4.54617	3	15.07	35.0058	0.236706	25.979	0.121026
ESM2 mini CTD/Niskin bottle deployments	57	CEND 13/05	55.6355	7.16267	30	14.63	33.43	-0.0915001	24.967	-0.10862
ESM2 mini CTD/Niskin bottle deployments	50	CEND 13/05	55.5362	4.54617	32	13.96	35.0106	0.306263	26.345	0.439223
ESM2 mini CTD/Niskin bottle deployments	54	CEND 13/05	55.694	6.7155	37	14.93	33.8797	0.00335835	25.271	-0.0809616
ESM2 mini CTD/Niskin bottle deployments	52	CEND 13/05	55.7445	5.24233	53	8.26	34.957	0.32752	27.421	1.73728
ESM2 mini CTD/Niskin bottle deployments	58	CEND 13/05	56.5867	6.9325	3	15.16	32.905	-0.309948	24.334	-0.445788
ESM2 mini CTD/Niskin bottle deployments	62	CEND 13/05	56.7497	4.5465	3	15.9	34.0742	-0.000588816	25.054	-0.302189
ESM2 mini CTD/Niskin bottle deployments	58	CEND 13/05	56.5867	6.9325	41	9.88	34.346	0.0944153	26.63	1.1413
ESM2 mini CTD/Niskin bottle deployments	62	CEND 13/05	56.7497	4.5465	58	7.2	35.1699	0.336904	27.769	1.9841
ESM2 mini CTD/Niskin bottle deployments	67	CEND 13/05	58.0883	4.86717	3	14.23	32.7965	-0.312914	24.444	-0.240434
ESM2 mini CTD/Niskin bottle deployments	63	CEND 13/05	57.7728	5.258	3	14.47	32.8638	-0.293666	24.459	-0.274946
ESM2 mini CTD/Niskin bottle deployments	66	CEND 13/05	57.6408	4.72217	3	14.65	33.02	-0.248771	24.549	-0.270371
ESM2 mini CTD/Niskin bottle deployments	66	CEND 13/05	57.6408	4.72217	85	7.43	35.44	0.389698	28.073	1.98538
ESM2 mini CTD/Niskin bottle deployments	63	CEND 13/05	57.7728	5.258	110	7.78	35.3147	0.428666	28.052	1.94595
ESM2 mini CTD/Niskin bottle deployments	67	CEND 13/05	58.0883	4.86717	165	7.51	35.3162	0.42019	28.241	1.99795
ESM2 mini CTD/Niskin bottle deployments	74	CEND 13/05	57.3077	2.48333	3	15.06	32.928	-0.218177	24.376	-0.331617
ESM2 mini CTD/Niskin bottle deployments	71	CEND 13/05	57.106	3.28217	3	15.32	33.038	-0.310941	24.399	-0.482621
ESM2 mini CTD/Niskin bottle deployments	69	CEND 13/05	56.7343	3.62833	3	15.47	33.67	-0.100255	24.889	-0.305535
ESM2 mini CTD/Niskin bottle deployments	69	CEND 13/05	56.7343	3.62833	59	7.01	35.0881	0.324559	27.738	2.01432
ESM2 mini CTD/Niskin bottle deployments	71	CEND 13/05	57.106	3.28217	67	7.28	35.181	0.388701	27.812	2.01798
ESM2 mini CTD/Niskin bottle deployments	74	CEND 13/05	57.3077	2.48333	81	7.25	35.1455	0.366498	27.847	2.0025
ESM2 mini CTD/Niskin bottle deployments	75	CEND 13/05	56.7845	2.51317	3	15.41	33.5285	-0.131474	24.764	-0.323314
ESM2 mini CTD/Niskin bottle deployments	80	CEND 13/05	57.2535	1.55633	3	15.79	33.946	-0.0431369	25.025	-0.320097
ESM2 mini CTD/Niskin bottle deployments	77	CEND 13/05	56.738	1.55383	3	14.74	35.0543	0.230757	26.09	0.188997
ESM2 mini CTD/Niskin bottle deployments	75	CEND 13/05	56.7845	2.51317	71	7.14	35.1123	0.368938	27.78	2.02958
ESM2 mini CTD/Niskin bottle deployments	80	CEND 13/05	57.2535	1.55633	96	7.28	35.1368	0.359561	27.846	1.98884
ESM2 mini CTD/Niskin bottle deployments	77	CEND 13/05	56.738	1.55383	98	7.73	35.0983	0.358574	27.83	1.88705
ESM2 mini CTD/Niskin bottle deployments	81	CEND 13/05	56.7845	0.411833	3	14.32	35.075	0.353639	26.198	0.405959
ESM2 mini CTD/Niskin bottle deployments	86	CEND 13/05	56.5417	-0.361167	3	14.17	35.0814	0.324029	26.22	0.409949
ESM2 mini CTD/Niskin bottle deployments	84	CEND 13/05	57.1022	-0.3295	3	13.86	35.2227	0.35663	26.401	0.51199
ESM2 mini CTD/Niskin bottle deployments	86	CEND 13/05	56.5417	-0.361167	75	10.08	35.0008	0.355535	27.242	1.35761
ESM2 mini CTD/Niskin bottle deployments	84	CEND 13/05	57.1022	-0.3295	80	9.68	35.08	0.390685	27.396	1.48237
ESM2 mini CTD/Niskin bottle deployments	81	CEND 13/05	56.7845	0.411833	82	8.64	35.0682	0.371899	27.587	1.69654
ESM2 mini CTD/Niskin bottle deployments	87	CEND 13/05	56.5093	-1.35617	3	13.47	34.8862	0.273545	26.219	0.516265
ESM2 mini CTD/Niskin bottle deployments	87	CEND 13/05	56.5093	-1.35617	66	12.02	34.896	0.349118	26.796	0.916638
ESM2 mini CTD/Niskin bottle deployments	90	CEND 13/05	58.3577	-2.57167	3	12.48	35.0118	0.308087	26.518	0.772567
ESM2 mini CTD/Niskin bottle deployments	89	CEND 13/05	57.2402	-1.59583	3	12.58	35.015	0.285388	26.5	0.727468
ESM2 mini CTD/Niskin bottle deployments	90	CEND 13/05	58.3577	-2.57167	49	12.5	35.0096	0.257435	26.686	0.717435
ESM2 mini CTD/Niskin bottle deployments	89	CEND 13/05	57.2402	-1.59583	83	12.18	35.0448	0.310555	26.928	0.842235
SAIV micro-CTD attached to bottom trawl net	94	CEND 13/05	58.2472	0.570167	3	12.19	35.37	0.37964	26.854	0.90908
SAIV micro-CTD attached to bottom trawl net	95	CEND 13/05	57.9015	0.298333	3	12.47	35.2	0.29279	26.666	0.75951
SAIV micro-CTD attached to bottom trawl net	96	CEND 13/05	57.5257	0.499	3	13.06	35.24	0.421671	26.58	0.756231
SAIV micro-CTD attached to bottom trawl net	97	CEND 13/05	57.8085	1.51017	3	13.38	35.34	0.356522	26.596	0.619402
SAIV micro-CTD attached to bottom trawl net	98	CEND 13/05	58.4272	0.702833	3	13.41	35.37	0.374403	26.611	0.630563
SAIV micro-CTD attached to bottom trawl net	99	CEND 13/05	58.23	1.45433	3	13.29	35.4	0.299205	26.658	0.582245
SAIV micro-CTD attached to bottom trawl net	100	CEND 13/05	58.2685	2.72917	3	13.22	34.88	0.251018	26.269	0.549738
SAIV micro-CTD attached to bottom trawl net	101	CEND 13/05	57.745	3.49283	3	13.6	34.54	0.0983631	25.932	0.311963
SAIV micro-CTD attached to bottom trawl net	102	CEND 13/05	58.4668	3.93183	3	13.56	32.66	-0.407443	24.485	-0.184883
SAIV micro-CTD attached to bottom trawl net	103	CEND 13/05	59.2245	3.34117	3	12.61	35.04	0.184441	26.515	0.619801
SAIV micro-CTD attached to bottom trawl net	110	CEND 13/05	60.0055	-0.510167	3	11.95	35.43	0.390577	26.946	0.973777
SAIV micro-CTD attached to bottom trawl net	111	CEND 13/05	60.2767	0.5815	3	11.84	35.48	0.3965	27.008	1.00434
SAIV micro-CTD attached to bottom trawl net	112	CEND 13/05	60.3833	1.22417	3	12.11	35.43	0.361081	26.921	0.908441
SAIV micro-CTD attached to bottom trawl net	113	CEND 13/05	59.2838	2.1365	3	12.84	34.94	0.155606	26.394	0.539446
SAIV micro-CTD attached to bottom trawl net	114	CEND 13/05	59.2955	1.65583	3	12.51	35.26	0.325546	26.708	0.783306
SAIV micro-CTD attached to bottom trawl net	115	CEND 13/05	59.2218	0.8715	3	12.86	35.35	0.18324	26.707	0.5626
SAIV micro-CTD attached to bottom trawl net	116	CEND 13/05	59.2053	-0.487833	3	11.78	35.44	0.399461	26.991	1.02074
SAIV micro-CTD attached to bottom trawl net	117	CEND 13/05	59.2992	-1.19533	3	11.88	35.4	0.401435	26.938	1.00032
SAIV micro-CTD attached to bottom trawl net	118	CEND 13/05	59.0393	-2.08017	3	12.47	35.24	0.382287	26.699	0.849007
SAIV micro-CTD attached to bottom trawl net	119	CEND 13/05	58.4008	-2.564	3	12.76	35.07	0.362522	26.509	0.764282
* after Marchitto et al. (2014)
						Salinity-d18Osw statistics
						Slope	0.254422	-8.63939	Intercept
						Std error slope	0.00742816	0.257854	Std error intercept
						R2	0.865058	0.0727691
						Density-d18Oc statistics
						-0.20747	1.43144	25.6241
						0.0186885	0.0339845	0.0256614
						0.950988	0.271054	#N/A
						1765.68	182	#N/A
						259.45	13.3716	#N/A
