# Supplementary material for: Living on the edge: environmental variability of a shallow late Holocene cold-water coral mound
Source: Coral Reefs. 2022 Apr 12;41(4):1255–71. doi: 10.1007/s00338-022-02249-4 (PMC9325858; doi:10.1007/s00338-022-02249-4)
Supplement: Supplementary file 7 — Supplementary file7 (XLSX 28 kb) [file 338_2022_2249_MOESM7_ESM.xlsx]

## Sheet: Tabelle1
					Regional relationship			Lynch-Stieglitz et al. 1999
Depth	d18OLob	Mg/Ca	TempMg/Ca	d18Osw	Sald18Osw	SalT-D-P	Density (sQ)	SalLS1999	DensLS1999
[cm]	[‰ VPDB]	mmol/mol	[°C] 1	[‰ VSMOW] 2	[g/kg] 3	[g/kg] 4	[kg/m3] 5	[g/kg] 6	[kg/m3] 7
0	1.06	2.6757	11.1464	0.296788	35.1234	35.2	26.9083	35.0231	26.7915
3	0.445	2.48073	10.0499	-0.563826	31.7408	34.01	26.22	32.0958	26.3153
6	-0.169	2.49699	10.1446	-1.15662	29.4108	32.87	25.3763	30.0795	25.7267
9	0.293						26.0257		26.1801
12	-0.181	2.85274	12.0749	-0.736224	31.0632	33.28	25.3582	31.5094	25.7141
15	0.151	2.94419	12.5322	-0.301785	32.7707	34.06	25.8355	32.9871	26.0476
18	0.364	2.73994	11.4902	-0.322197	32.6905	34.2	26.1176	32.9177	26.2441
21	0.024	2.85895	12.1064	-0.524164	31.8967	33.71	25.6583	32.2307	25.9239
24	0.883	2.31668	9.05829	-0.347944	32.5893	34.49	26.7263	32.8301	26.666
27	0.956	2.55927	10.5016	0.0483595	34.147	34.9	26.8029	34.1781	26.7189
30	0.81	2.35352	9.28698	-0.369716	32.5037	34.37	26.6474	32.7561	26.6116
33	0.259	2.64454	10.9766	-0.542245	31.8256	33.88	25.9809	32.1692	26.1489
36	0.19	2.8748	12.1866	-0.340209	32.6197	34.04	25.8886	32.8564	26.0846
39	0.932	2.46155	9.93737	-0.10203	33.5559	34.74	26.778	33.6666	26.7017
42	0.443	2.37199	9.40027	-0.711339	31.161	33.86	26.2175	31.5941	26.3136
45	0.892	2.28522	8.86015	-0.383326	32.4502	34.44	26.7359	32.7098	26.6727
48	0.264	2.42162	9.70037	-0.823117	30.7216	33.61	25.9875	31.2139	26.1535
51	0.094	2.67463	11.1405	-0.670517	31.3214	33.61	25.7568	31.7329	25.9927
54	0.287	2.55566	10.4811	-0.625227	31.4994	33.82	26.0178	31.887	26.1746
60	0.975	2.57129	10.5695	0.0825717	34.2814	34.95	26.8225	34.2945	26.7324
63	0.367	2.36546	9.36032	-0.796288	30.8271	33.72	26.1215	31.3051	26.2468
66	0.015	2.2482	8.62349	-1.31334	28.7948	32.92	25.6455	29.5465	25.915
69	1.072	2.35856	9.31797	-0.100776	33.5608	34.8	26.9202	33.6708	26.7996
72	0.086	2.43029	9.75214	-0.98952	30.0676	33.3	25.7457	30.6479	25.9849
75	0.181	2.21677	8.41944	-1.19304	29.2677	33.2	25.8764	29.9556	26.0761
78	0.006	2.44194	9.82147	-1.05399	29.8142	33.15	25.6327	30.4286	25.906
81	0.417	2.59768	10.7175	-0.442275	32.2185	34.1	26.1849	32.5093	26.2909
84	1.031	2.45399	9.89278	-0.0130171	33.9057	34.87	26.8794	33.9693	26.7716
87	0.638	2.43616	9.7871	-0.429689	32.268	34.27	26.4529	32.5521	26.4769
90	0.611	2.6779	11.1583	-0.14955	33.3691	34.53	26.4212	33.5049	26.455
93	0.174	2.37631	9.42663	-0.974434	30.1269	33.4	25.8669	30.6992	26.0695
96	-0.06	2.6295	10.8939	-0.879761	30.499	33.26	25.5375	31.0212	25.8395
99	-0.094	2.55135	10.4567	-1.0117	29.9804	33.09	25.4877	30.5724	25.8047
102	0.36	2.02716	7.12357	-1.30432	28.8303	33.28	26.1125	29.5771	26.2406
105	1.185	2.31448	9.04454	-0.0490222	33.7642	34.9	27.029	33.8469	26.8744
108	0.17	2.23228	8.52046	-1.18142	29.3134	33.2	25.8614	29.9952	26.0657
111	0.317	2.55808	10.4949	-0.59215	31.6295	33.89	26.057	31.9995	26.2019
114	0.928	2.34659	9.24424	-0.26129	32.9299	34.59	26.7738	33.1249	26.6988
117	-0.041	2.18802	8.23025	-1.45742	28.2285	32.75	25.5651	29.0564	25.8587
120	1.593	2.51864	10.2697	0.633413	36.4465	35.63	27.3779	36.1681	27.1124
123	-0.289	2.29512	8.9228	-1.55029	27.8635	32.37	25.1931	28.7405	25.5985
126	0.727	2.26348	8.72164	-0.579354	31.6797	34.18	26.5551	32.043	26.5477
129	0.242	2.23041	8.50833	-1.11213	29.5857	33.34	25.9583	30.2308	26.1332
132	0.189	2.35987	9.32605	-0.981966	30.0973	33.4	25.8872	30.6736	26.0836
135	-0.09	2.80505	11.8306	-0.699948	31.2058	33.41	25.4936	31.6328	25.8088
138	0.127	2.3471	9.24736	-1.06159	29.7843	33.26	25.8025	30.4027	26.0246
141	-0.331	2.34856	9.25636	-1.51757	27.9921	32.35	25.1276	28.8518	25.5526
144	0.817	2.75883	11.5898	0.153118	34.5587	34.95	26.6551	34.5344	26.6169
147	-0.044	2.14105	7.91573	-1.53088	27.9398	32.67	25.5607	28.8065	25.8557
150	0.053	2.52171	10.2873	-0.902644	30.4091	33.34	25.6994	30.9434	25.9526
153	0.02	2.74342	11.5086	-0.662068	31.3546	33.56	25.6526	31.7617	25.9199
156	0.683	2.50023	10.1634	-0.300409	32.7761	34.42	26.505	32.9918	26.513
159	0.87	2.57539	10.5926	-0.0172619	33.889	34.8	26.7124	33.9549	26.6565
162	0.095	2.46353	9.94903	-0.936416	30.2763	33.35	25.7582	30.8285	25.9936
165	1.382	2.28777	8.87632	0.110295	34.3904	35.1	27.2061	34.3888	26.9955
168	-0.161	2.62866	10.8893	-0.981797	30.098	33.72	25.3883	30.6742	25.7351
171	0.809	2.44966	9.86721	-0.240744	33.0106	34.55	26.6463	33.1947	26.6108
174	0.938	2.25194	8.64753	-0.384953	32.4438	34.48	26.7842	32.7042	26.706
177	0.972	2.50946	10.2167	0.000550153	33.959	34.87	26.8194	34.0155	26.7303
180	-0.004	2.69765	11.2648	-0.740684	31.0456	33.45	25.6184	31.4943	25.896
183	0.167	2.59368	10.6952	-0.697286	31.2162	33.65	25.8574	31.6419	26.0628
186	-0.059	2.49154	10.1129	-1.05371	29.8153	33.09	25.5389	30.4296	25.8405
189	0.765	2.3839	9.47284	-0.373084	32.4905	34.4	26.5977	32.7446	26.5772
192	-0.021	2.32745	9.1255	-1.23689	29.0953	32.96	25.5939	29.8065	25.8789
195	0.497	2.63139	10.9044	-0.32042	32.6975	34.29	26.2843	32.9237	26.3599
198	0.468	2.76063	11.5993	-0.193766	33.1953	34.4	26.2486	33.3545	26.3351
201	0.013	2.54821	10.4388	-0.908706	30.3852	33.3	25.6427	30.9228	25.913
204	0.519	2.52903	10.3294	-0.427223	32.2777	34.19	26.3111	32.5605	26.3786
207	0.341	2.59519	10.7036	-0.521388	31.9076	33.97	26.0881	32.2402	26.2236
210	1.42	2.32504	9.11052	0.200756	34.7459	35.19	27.2384	34.6964	27.0175
213	0.896	2.80997	11.856	0.291735	35.1035	35.13	26.7401	35.0059	26.6756
